# Supplementary material for: DNA Repair Genes: Alternative Transcription and Gene Expression at the Exon Level in Response to the DNA Damaging Agent, Ionizing Radiation
Source: PubMed Central journal article supplement (PMC3532210; doi:10.1371/journal.pone.0053358), 2012-12-28
Supplement: pone.0053358.s001.pdf [file pone.0053358.s001.pdf]

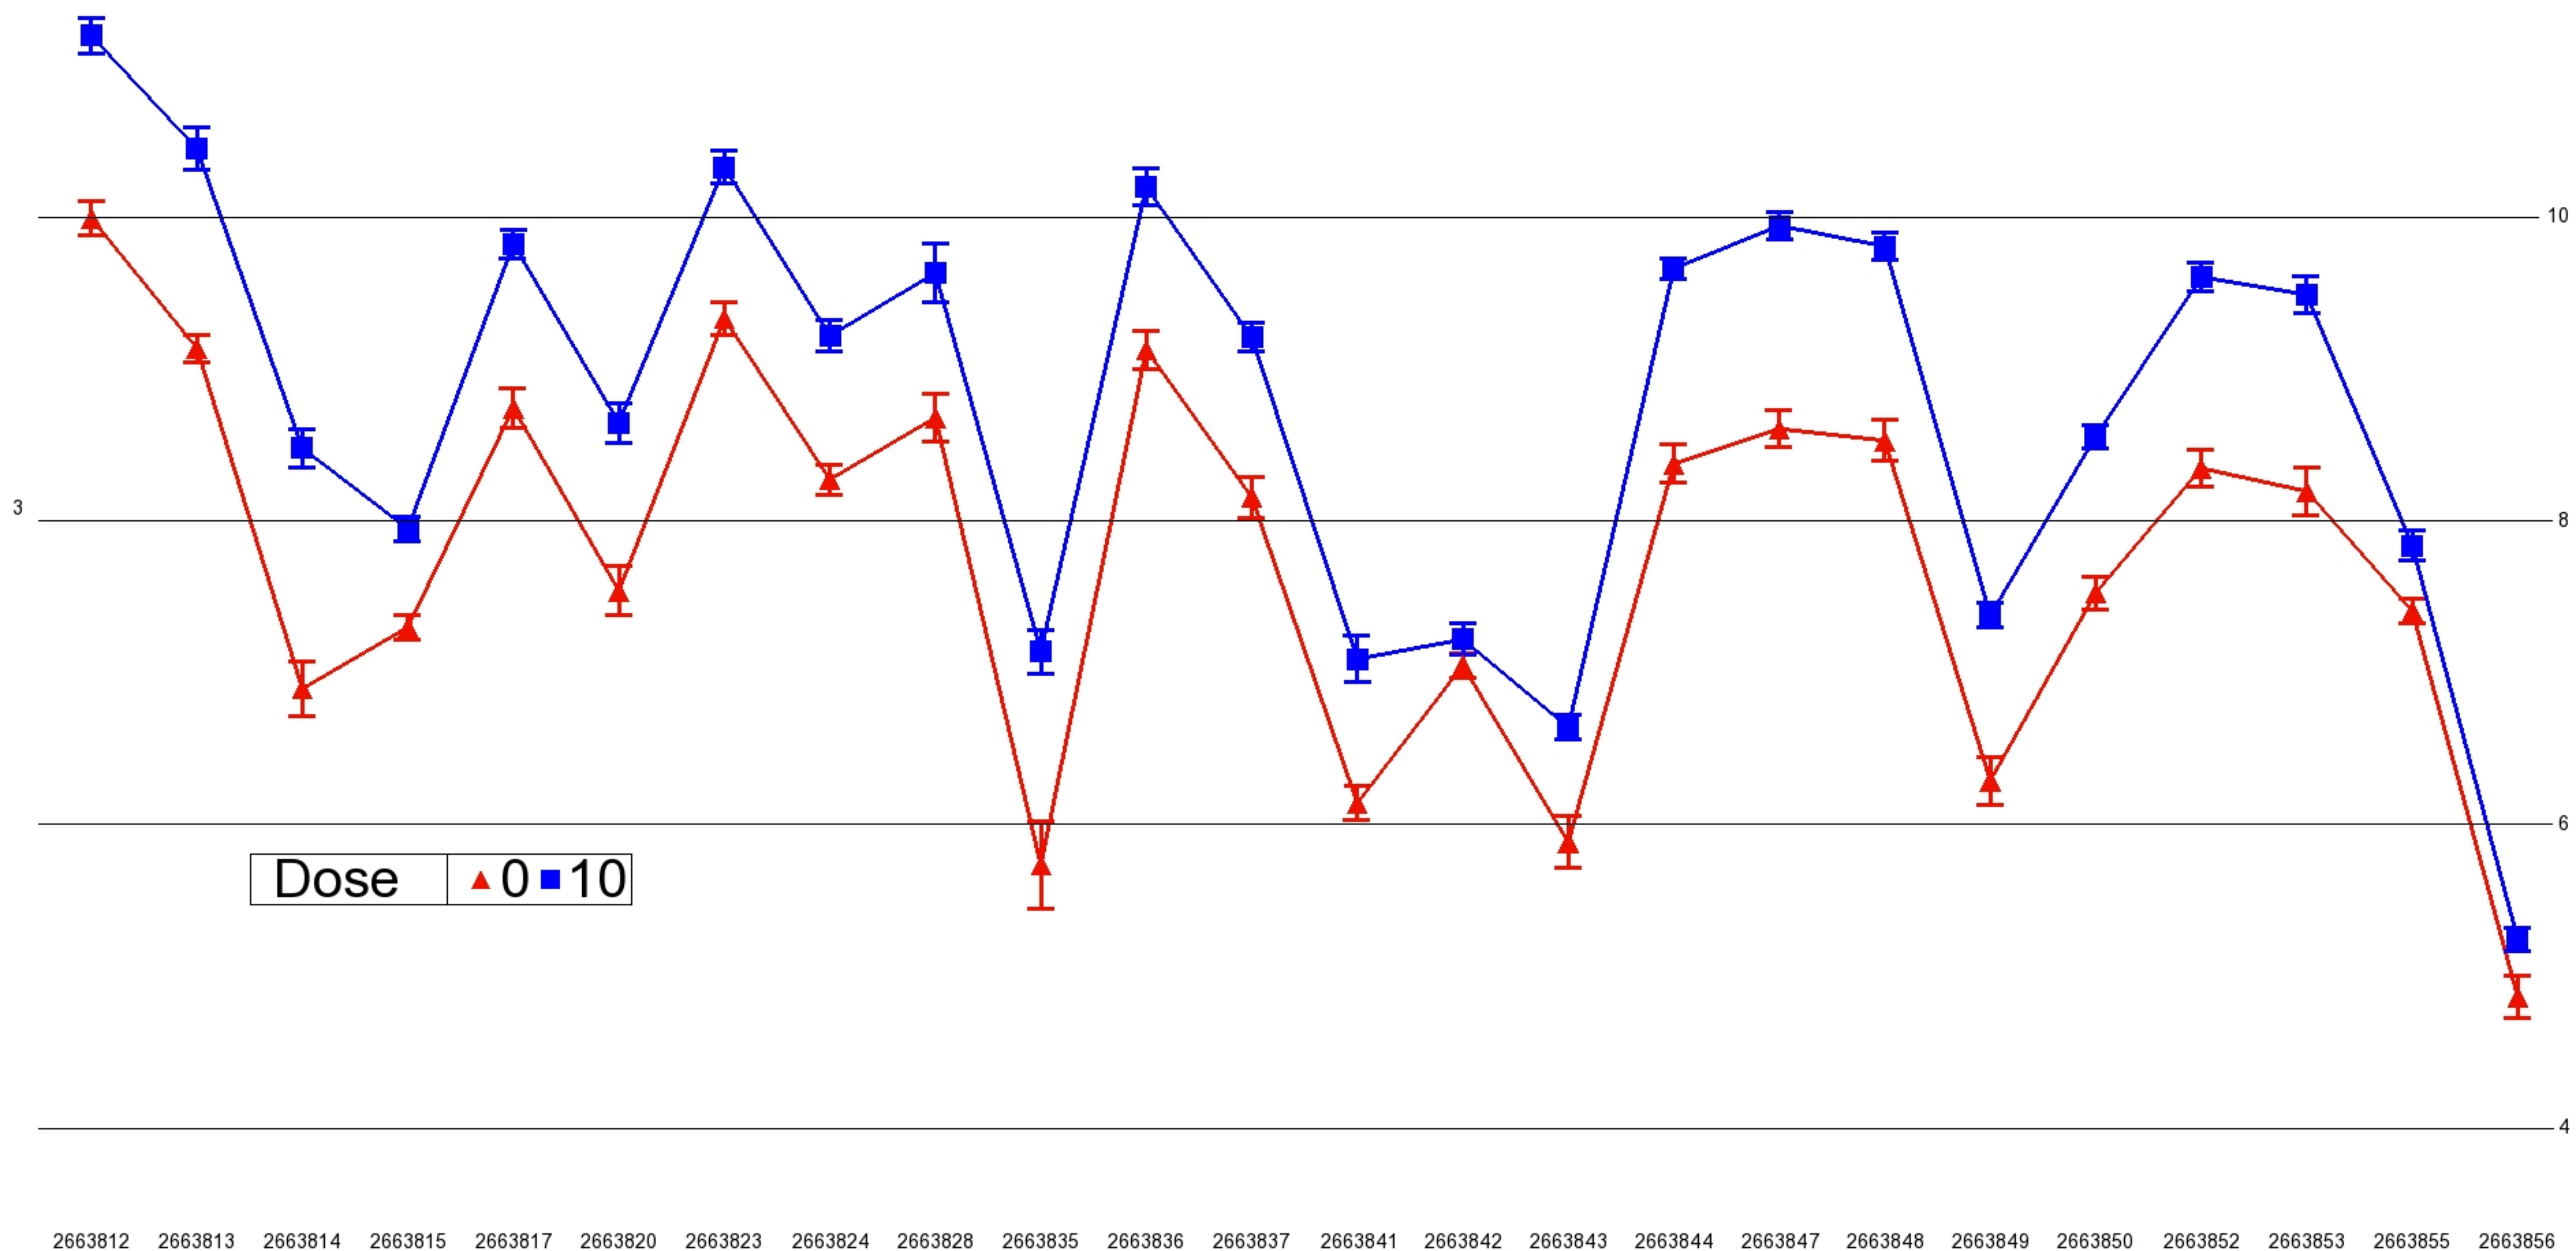

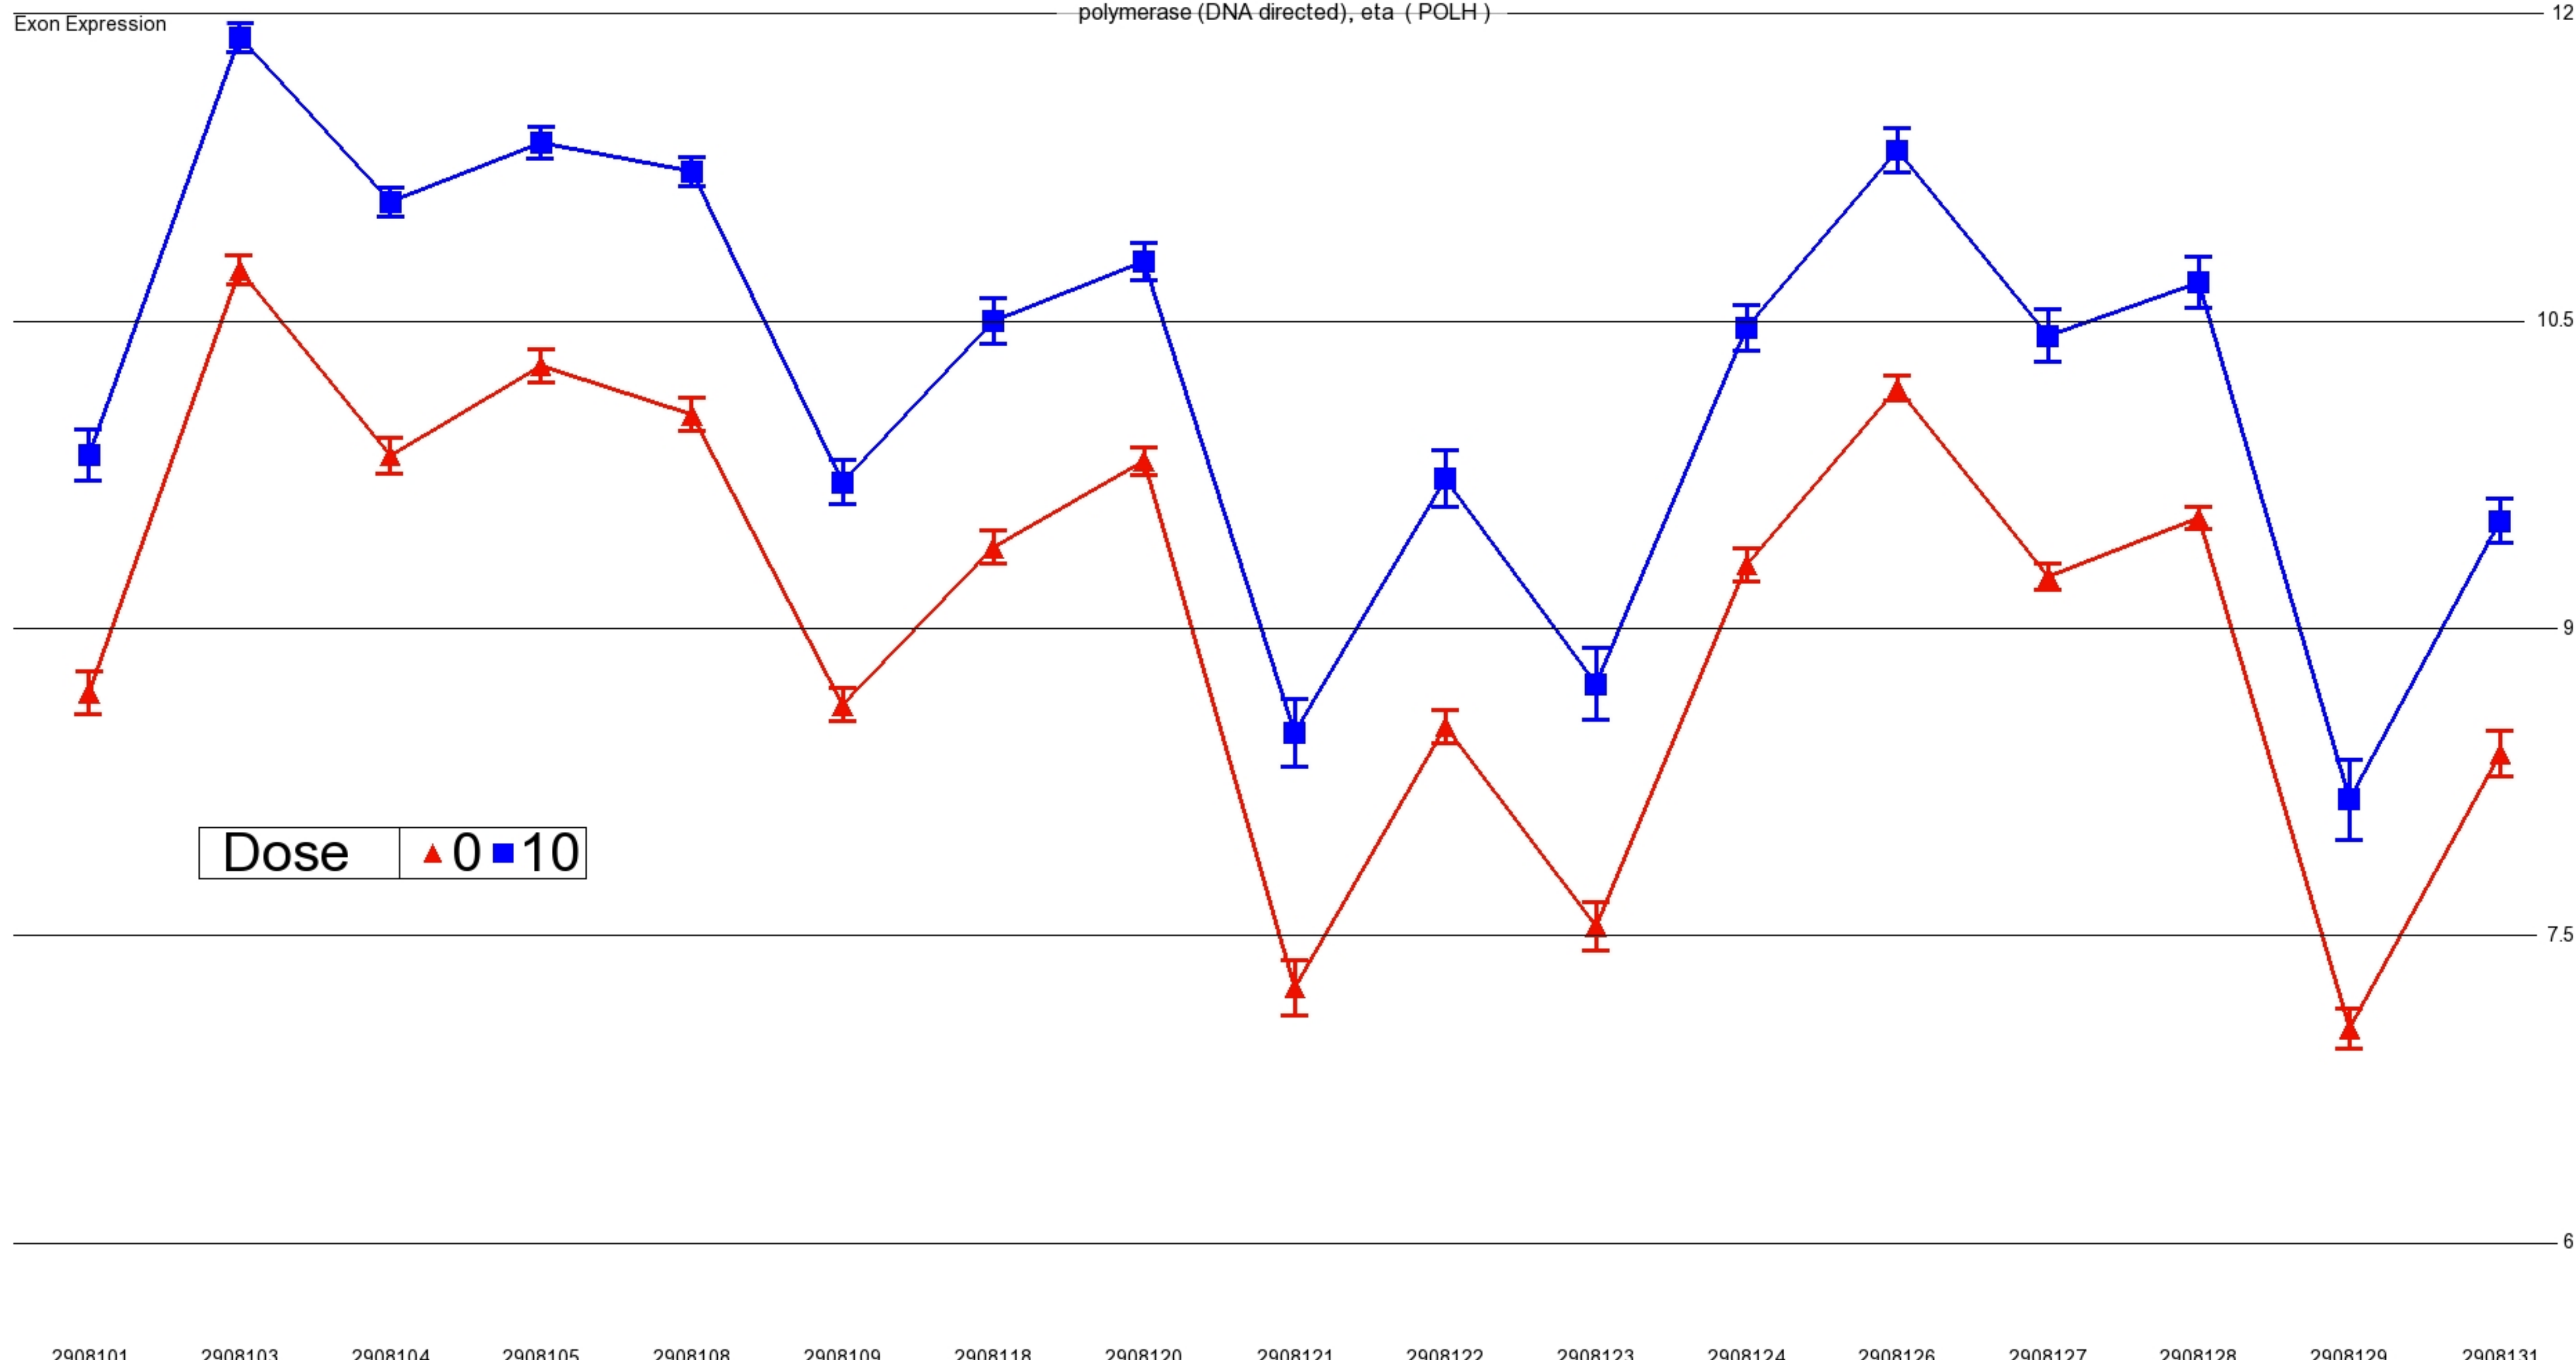

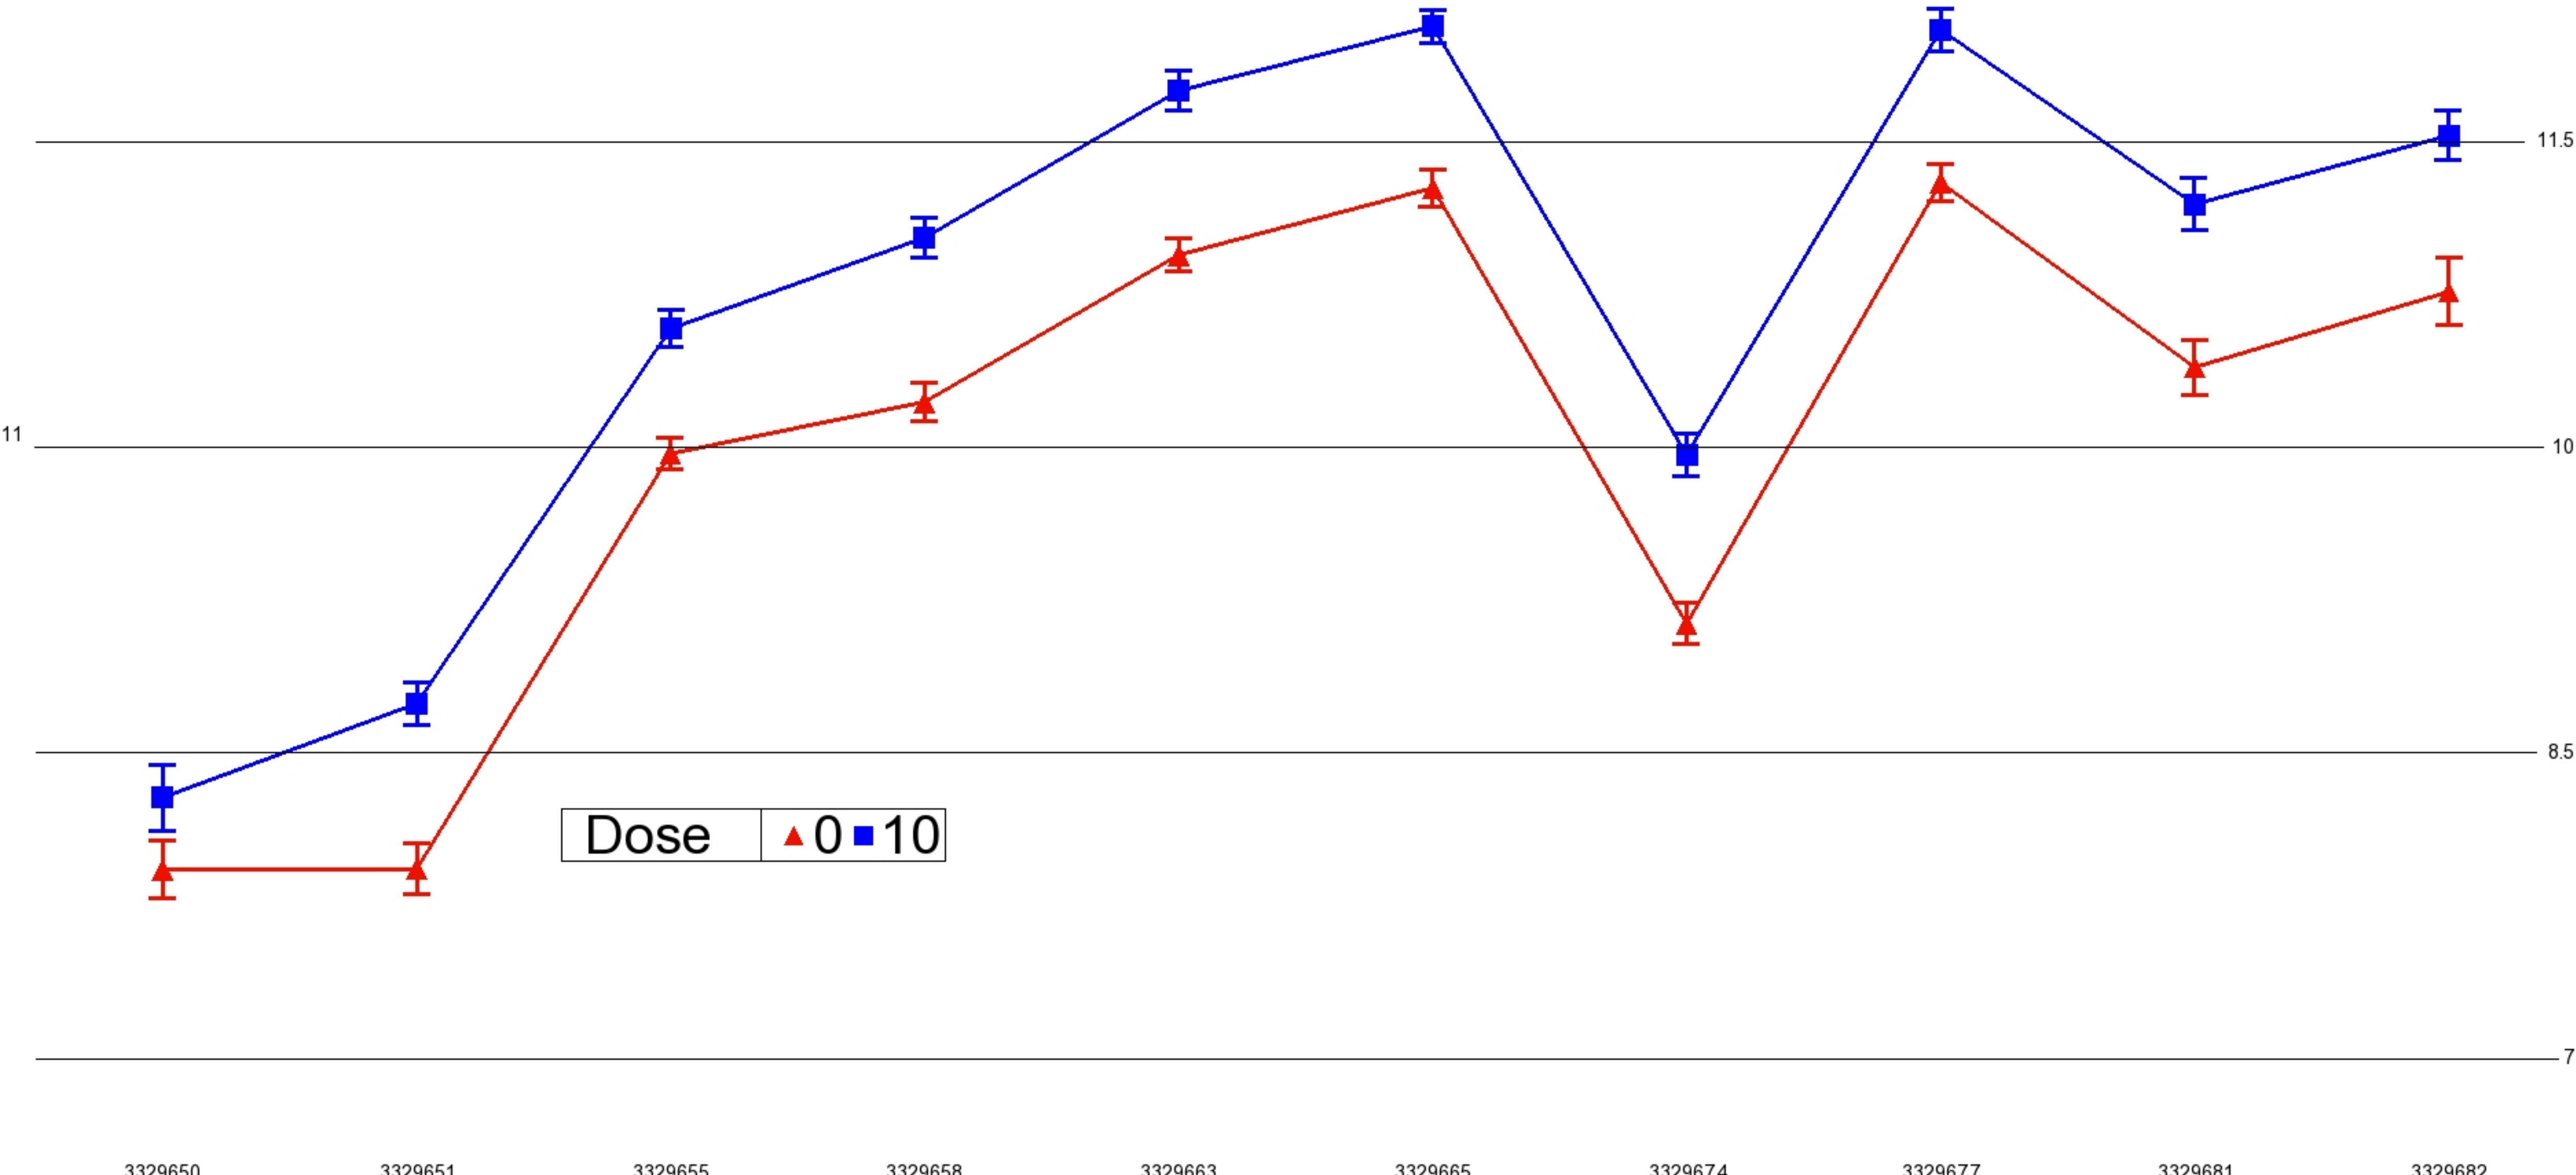

20

9.5

7.25

5

Dose ▲ 0 ■ 10

3896204

3896211

3896213

3896214

3896216

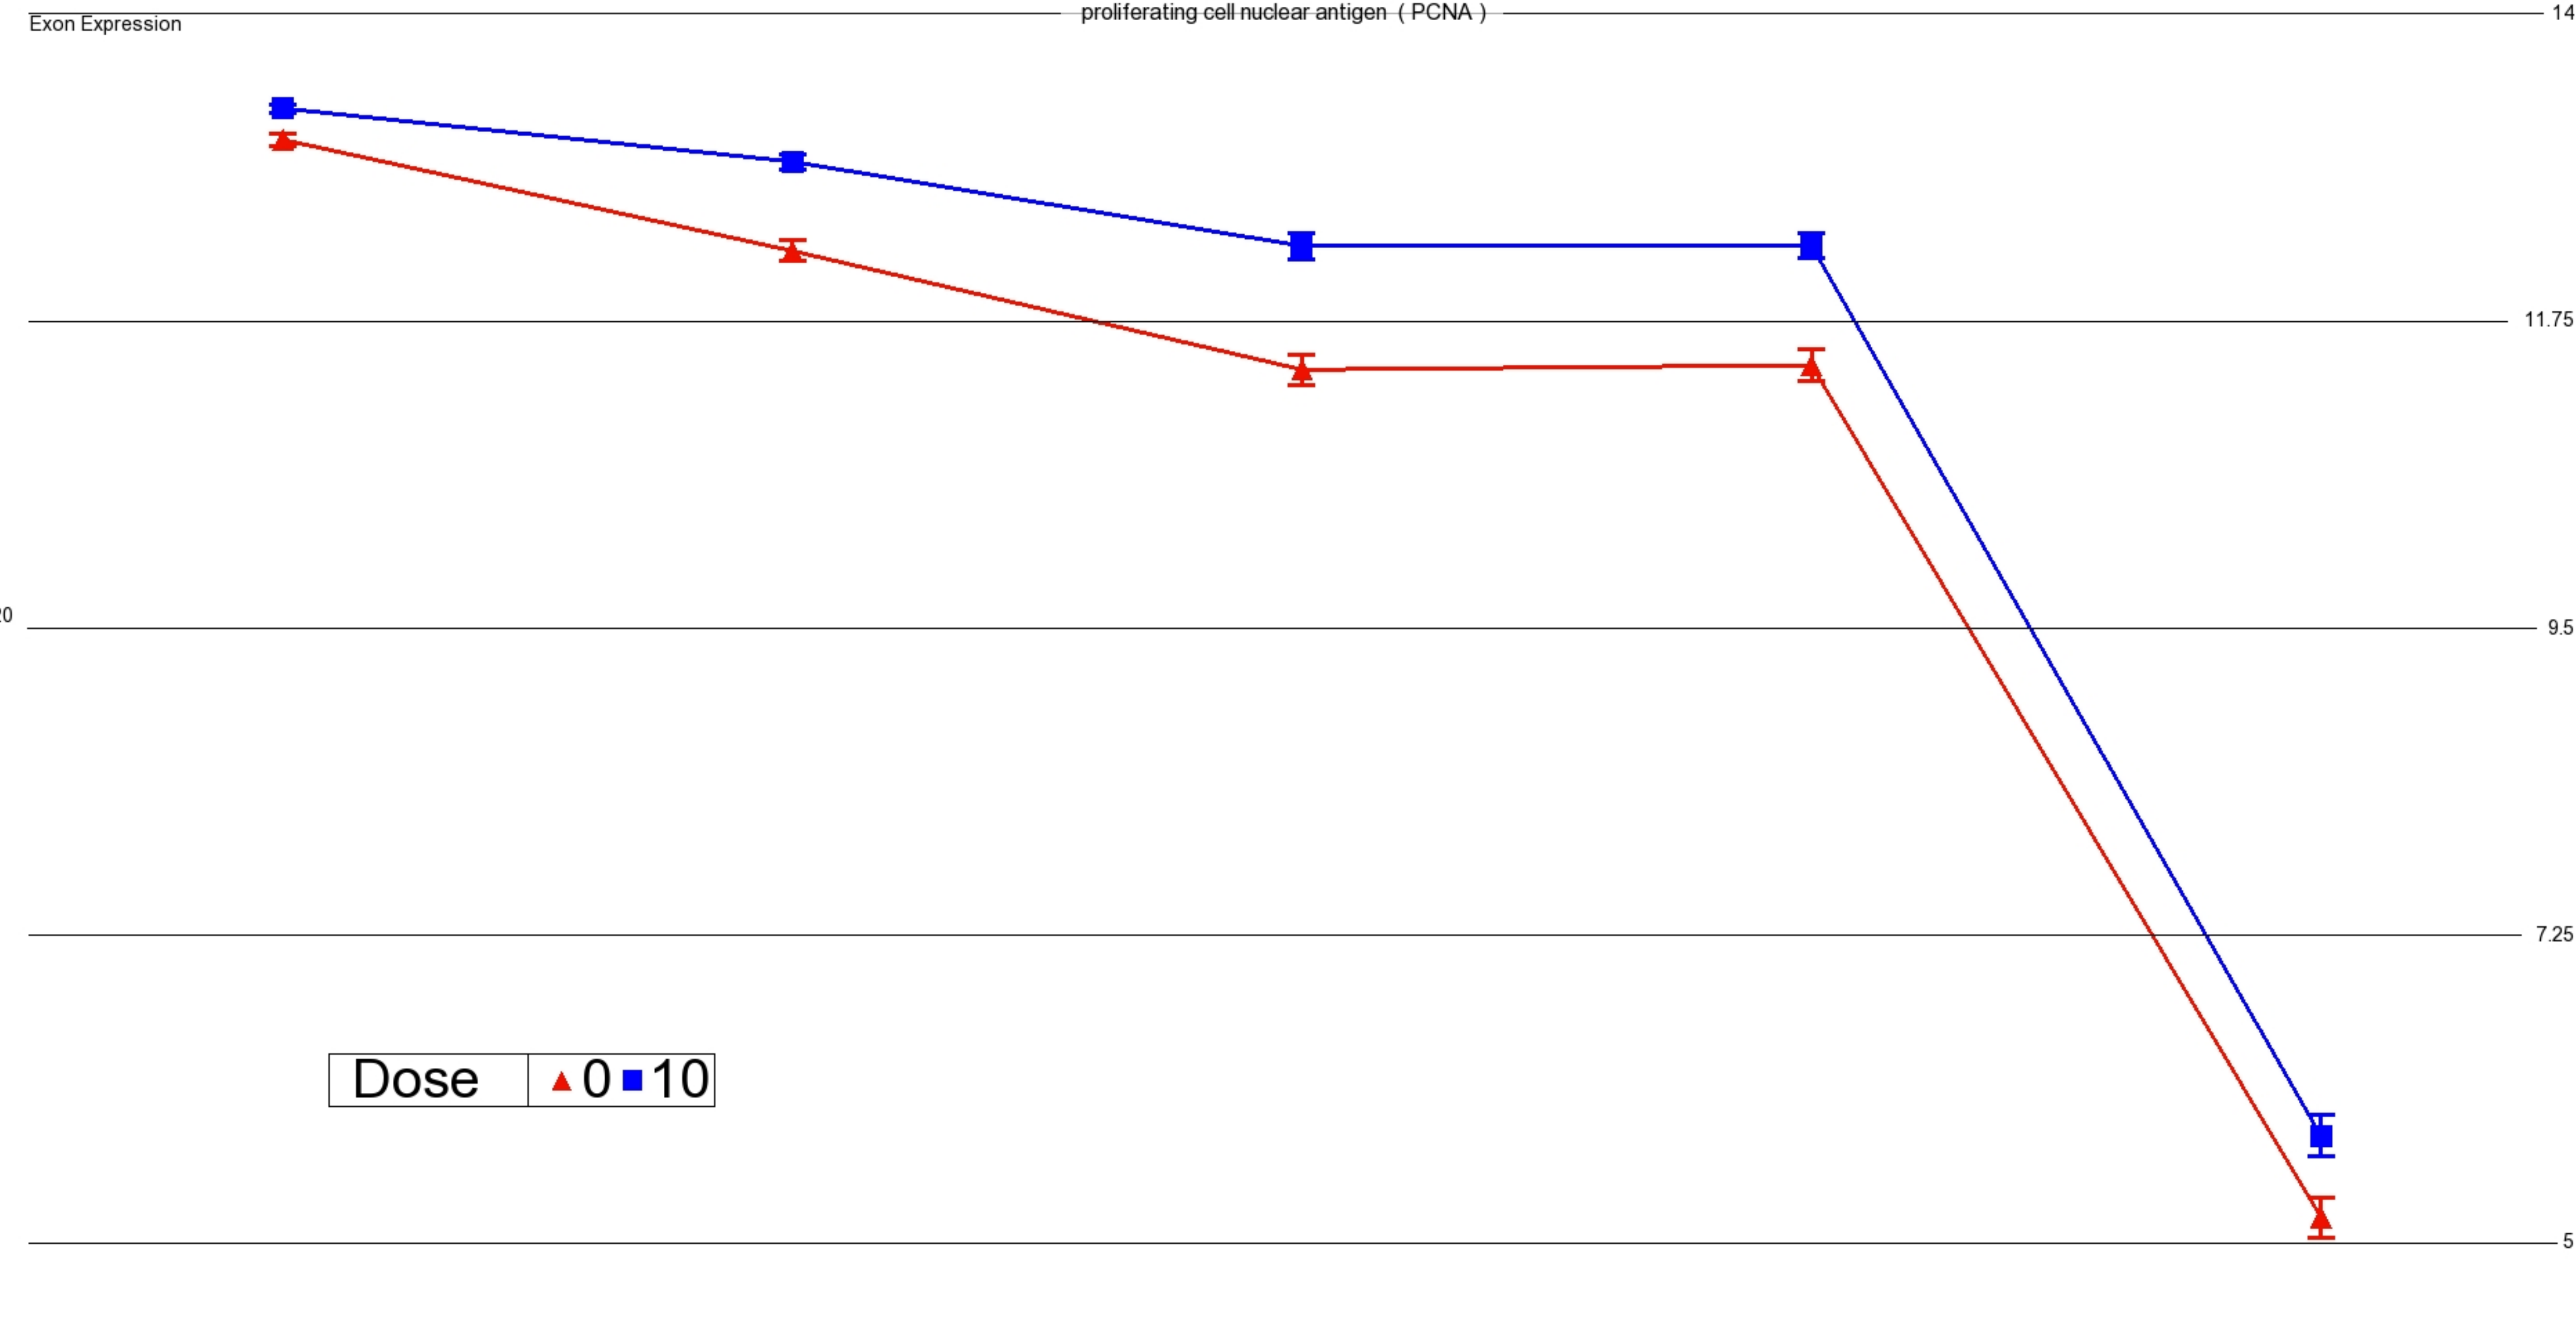

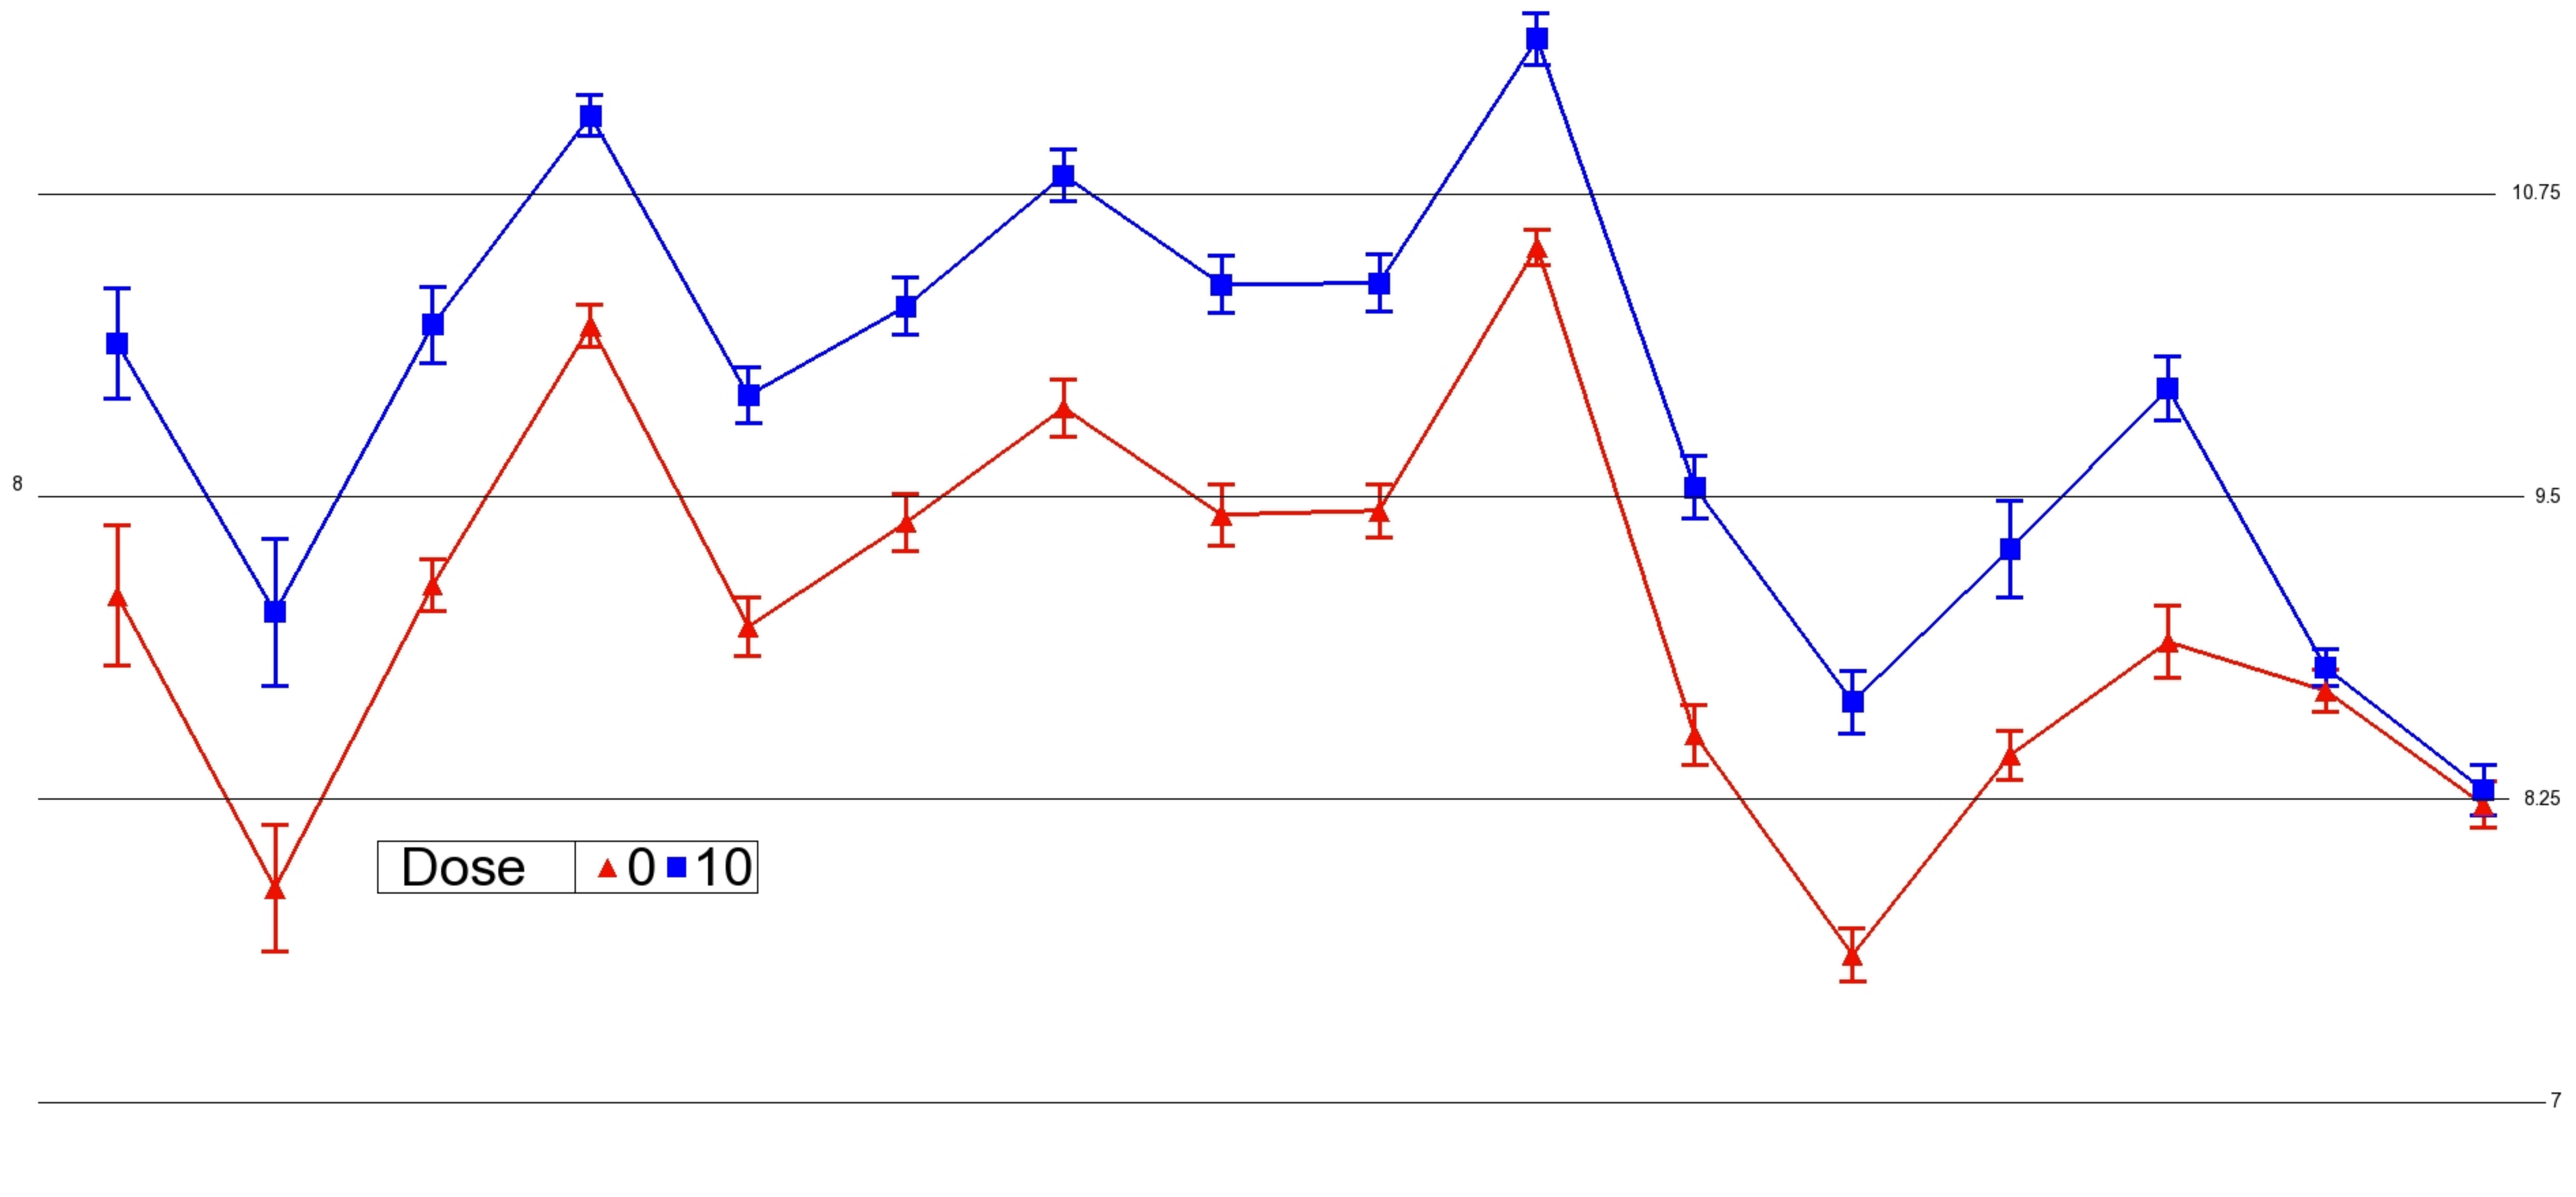

Dose    ▲ 0    ■ 10

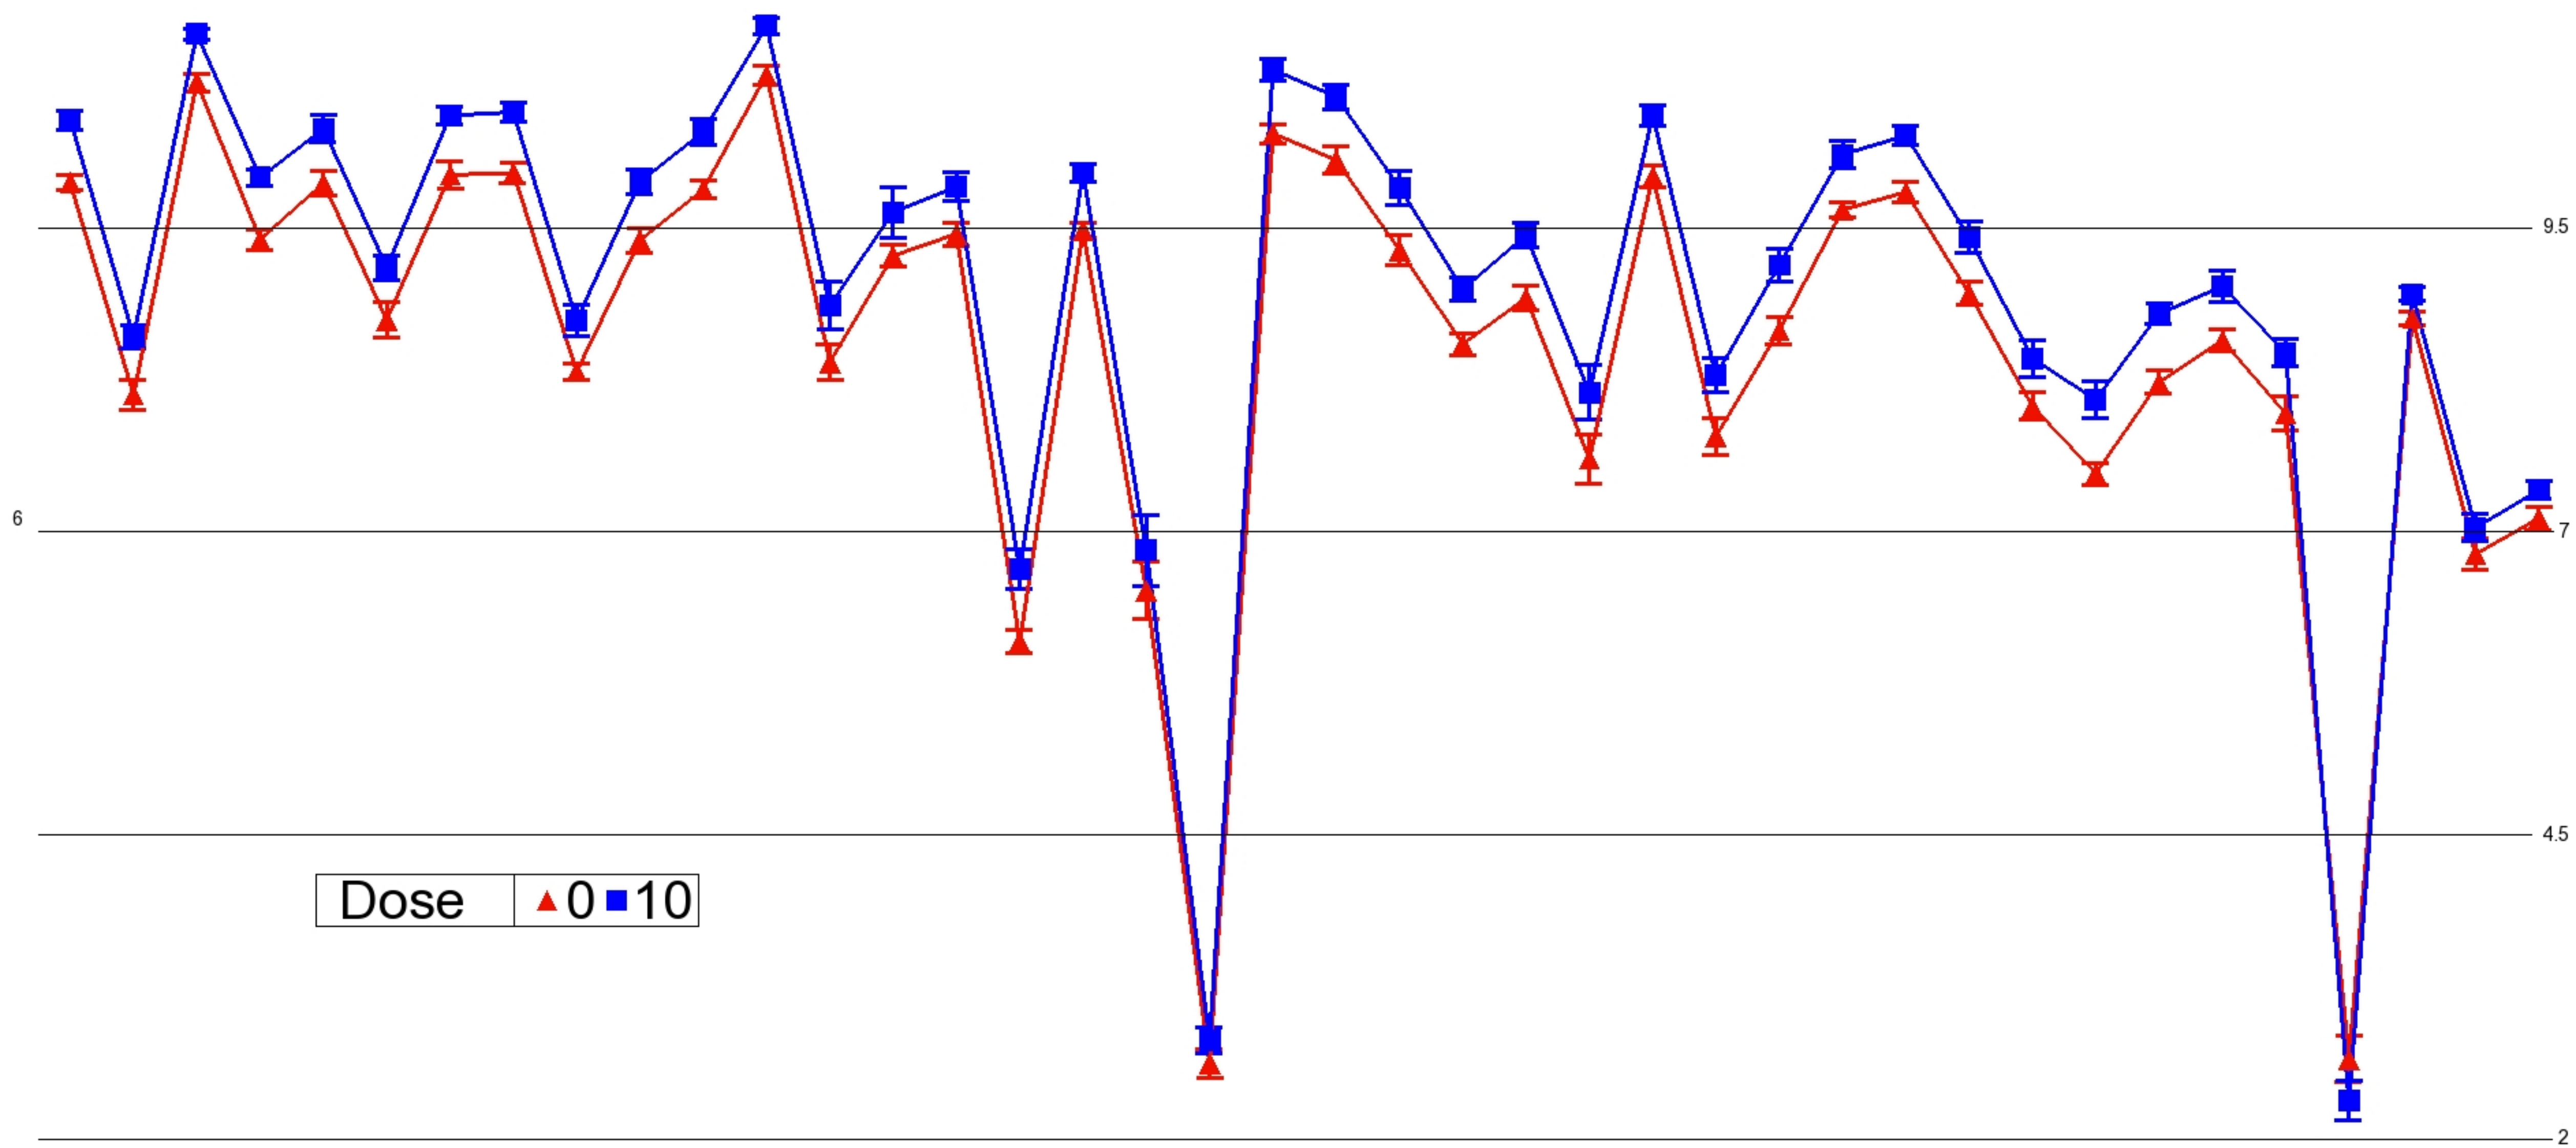

|      |     |      |
|------|-----|------|
| Dose | ▲ 0 | ■ 10 |
|------|-----|------|

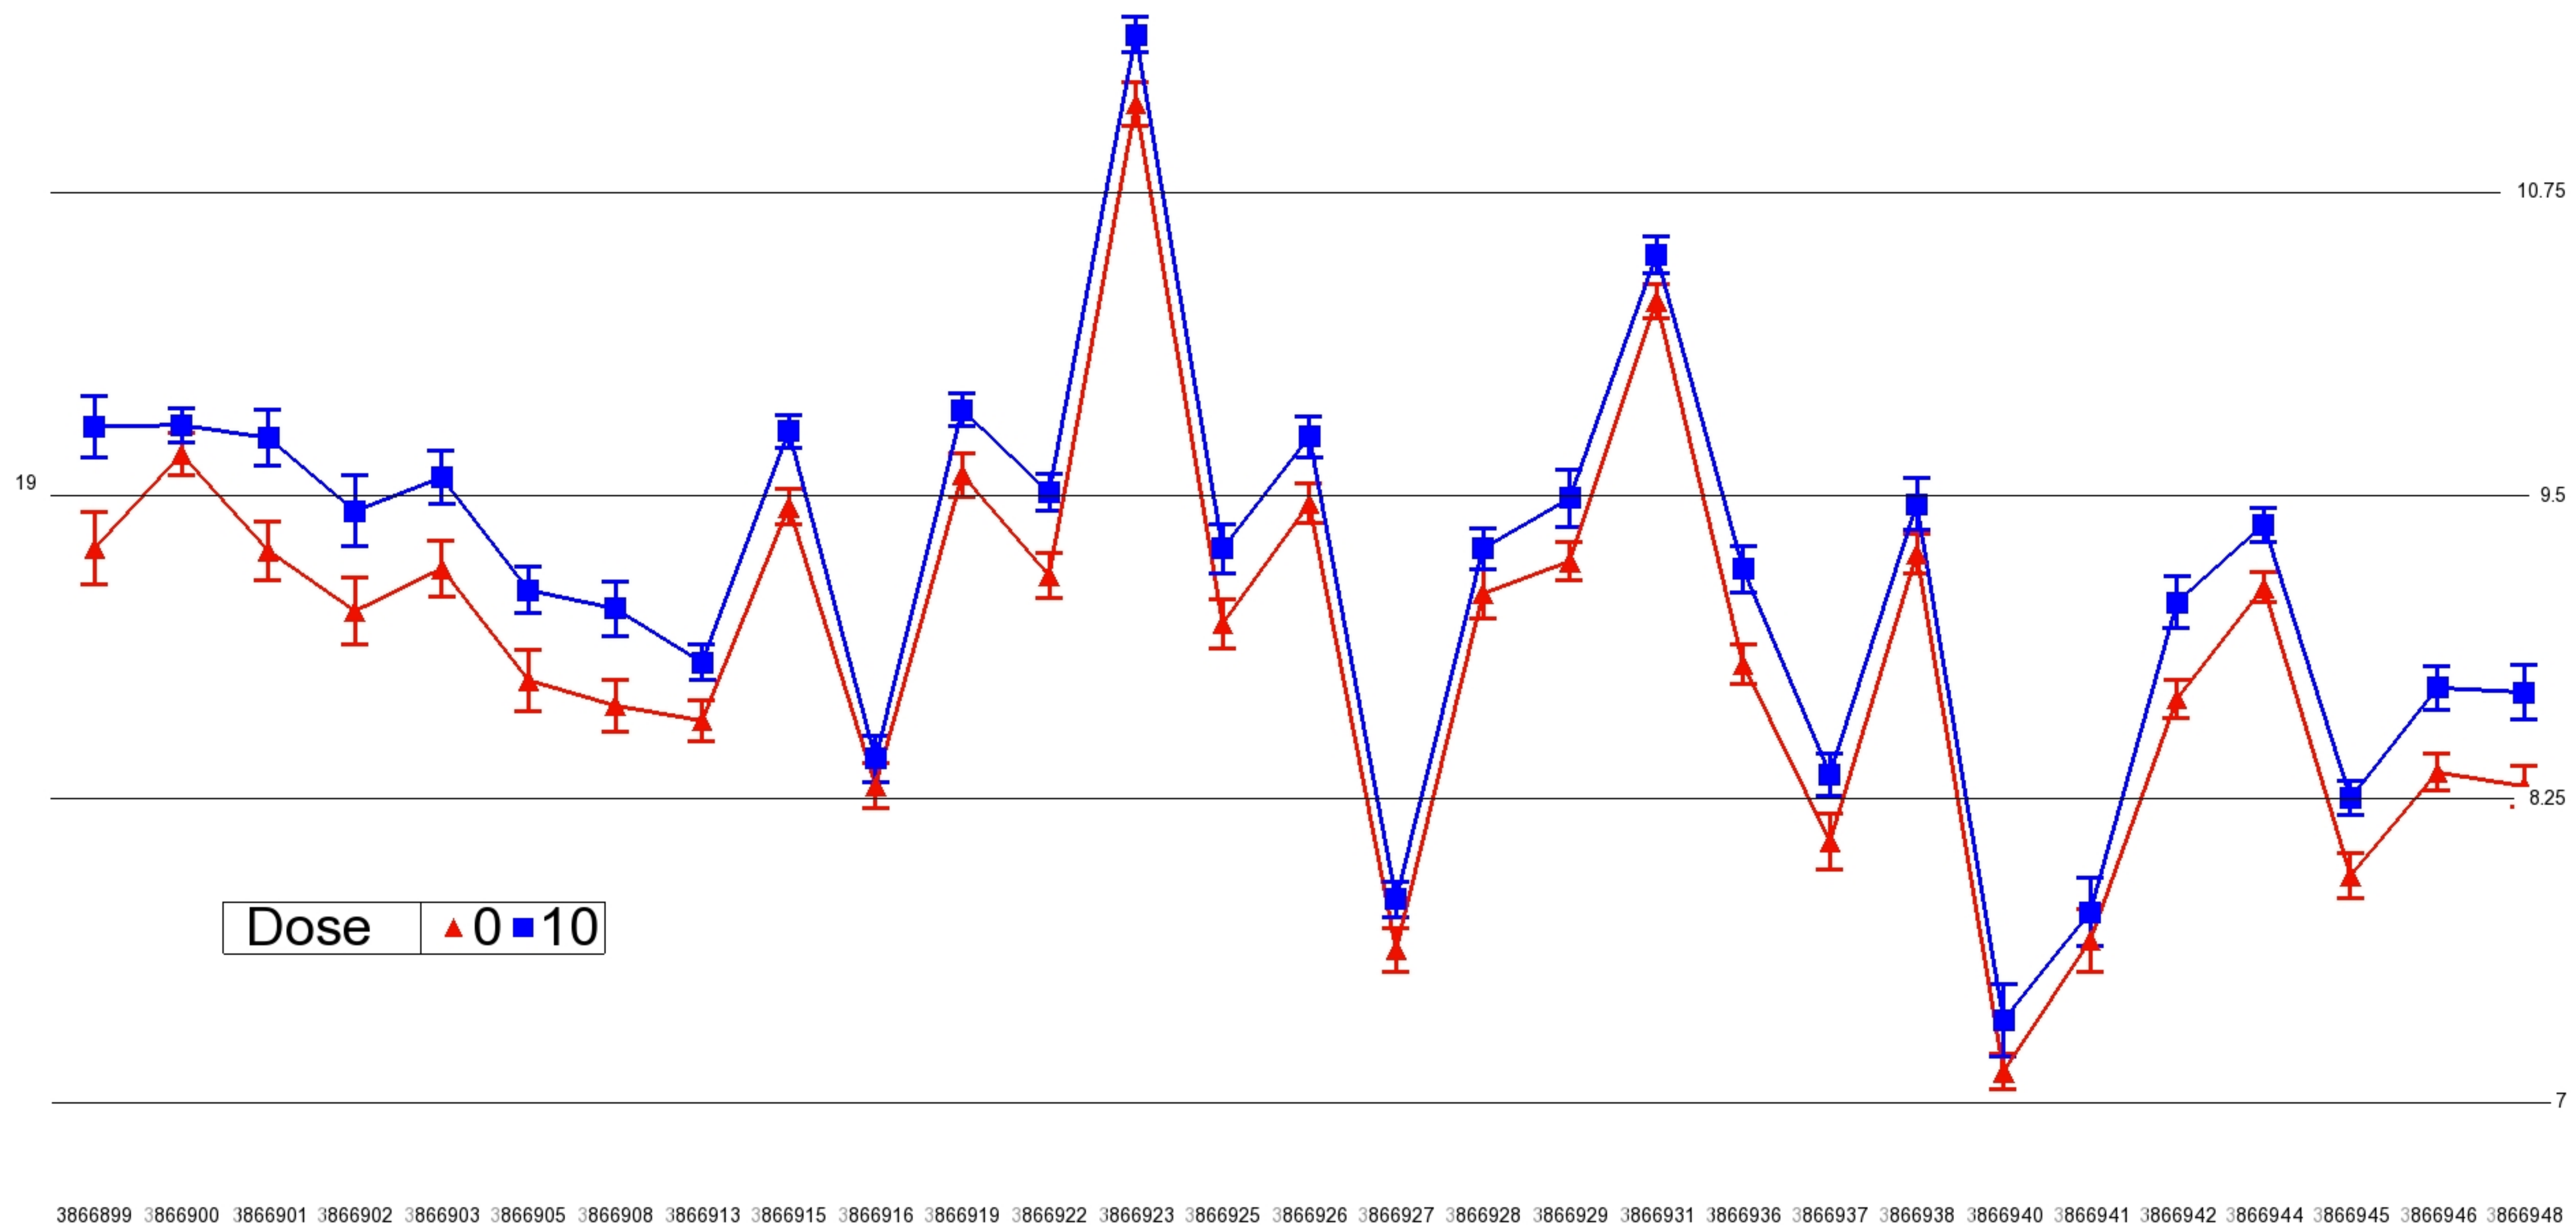

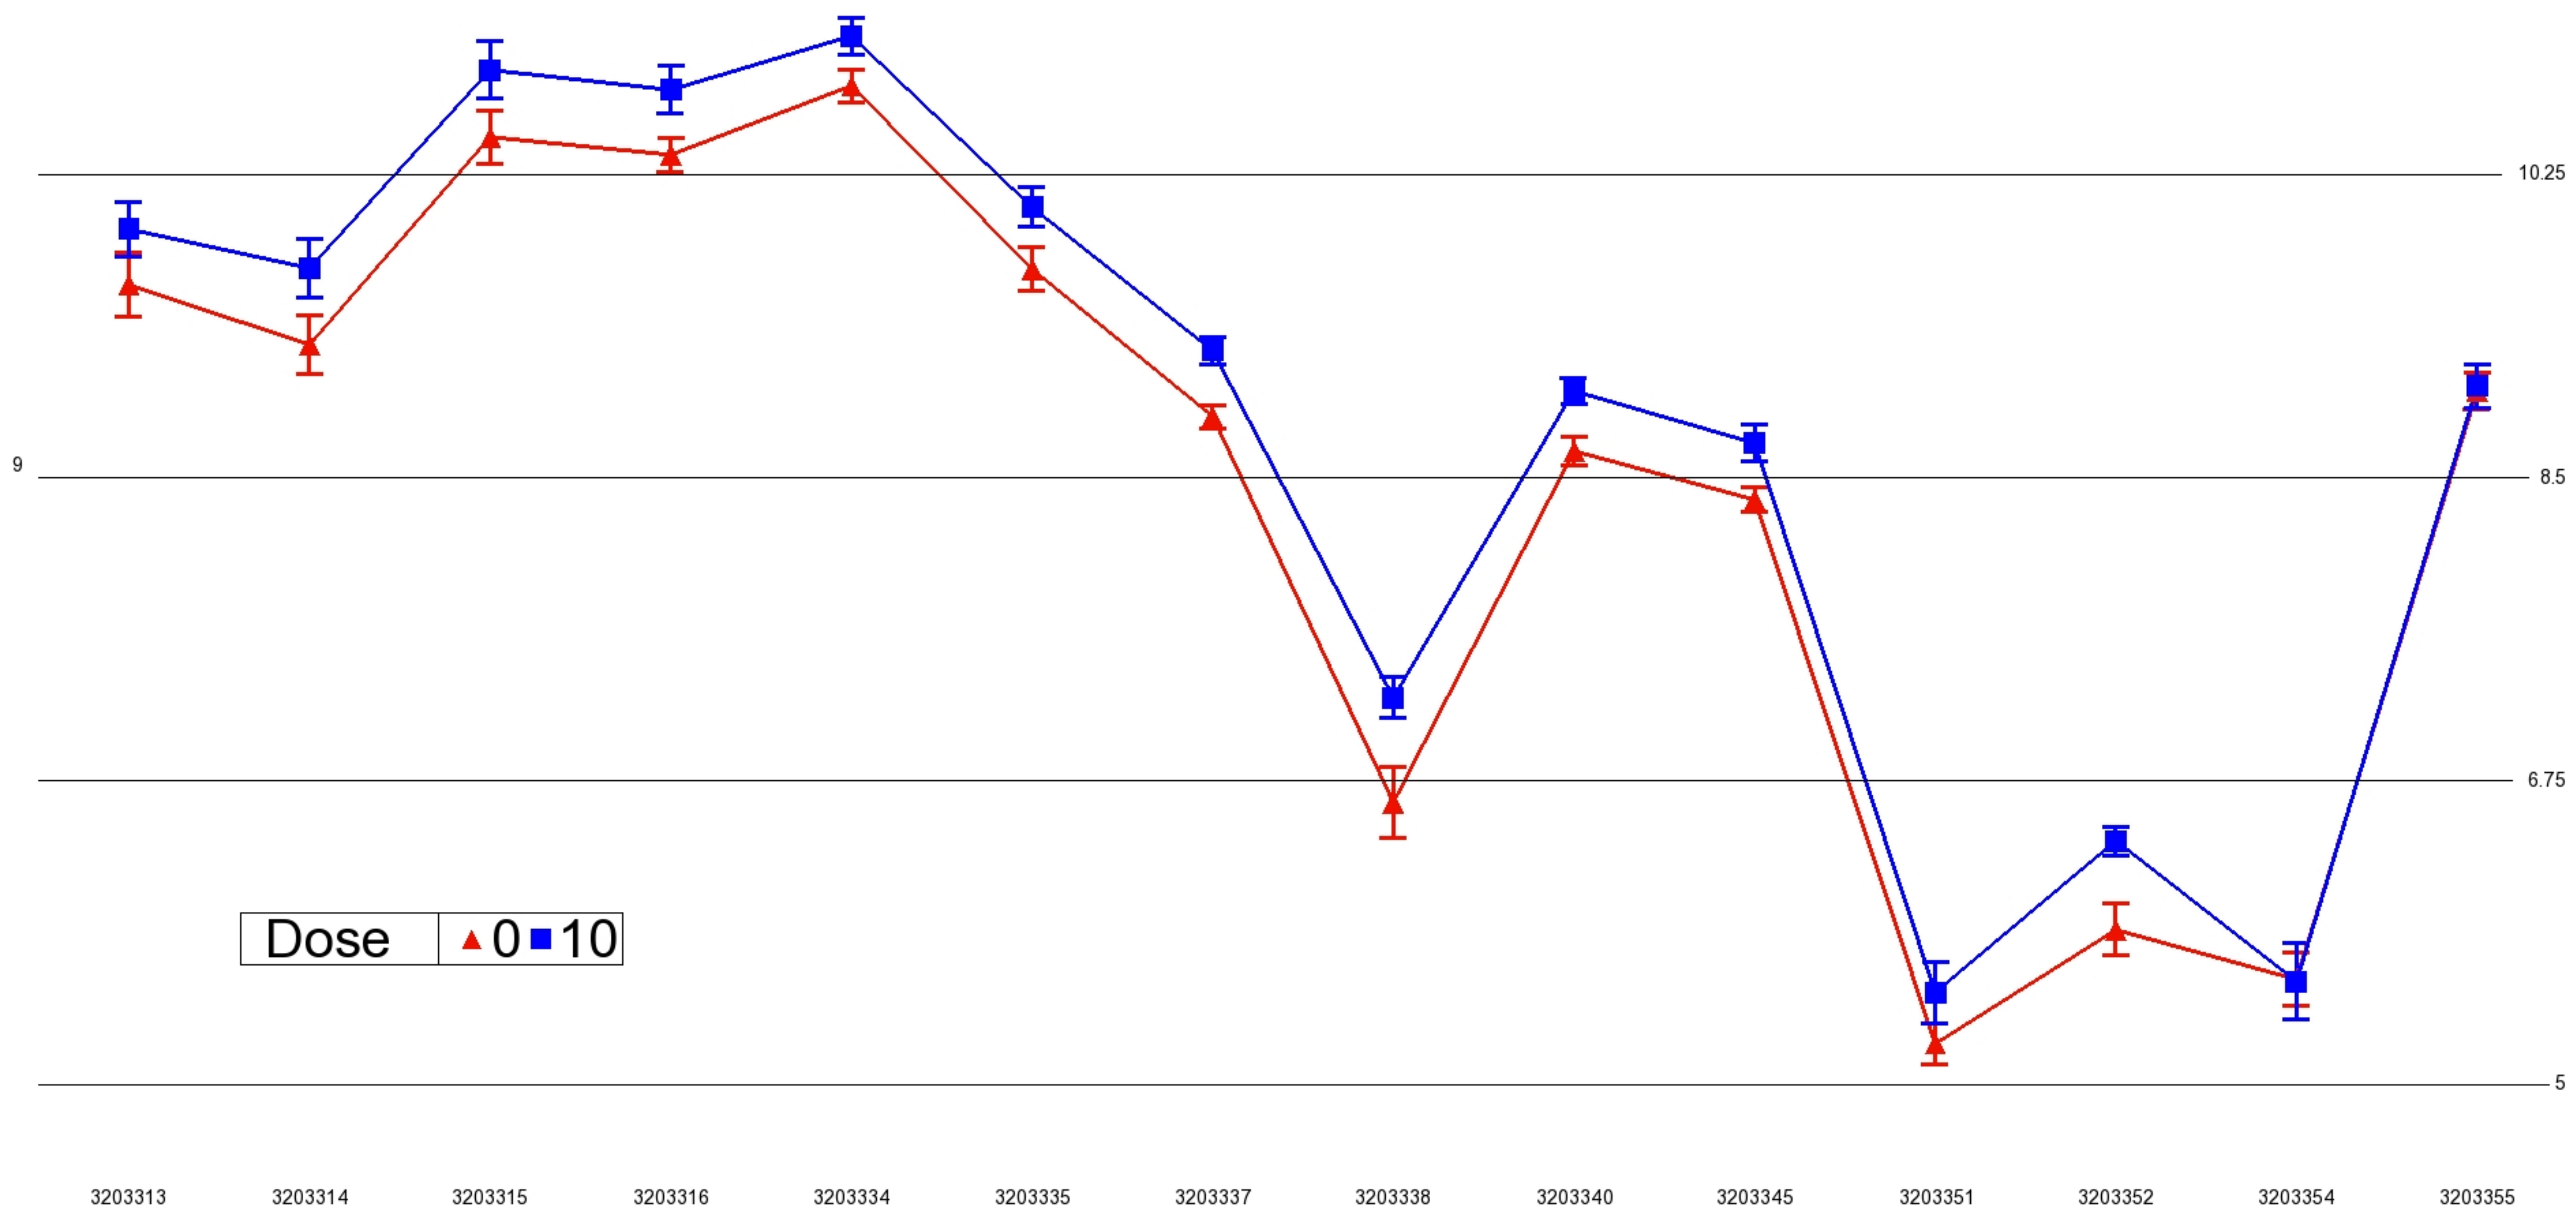



14

7

4.5

2

|      |     |      |
|------|-----|------|
| Dose | ▲ 0 | ■ 10 |
|------|-----|------|

3548165 3548166 3548167 3548168 3548175 3548176 3548178 3548179 3548180 3548184 3548185 3548187 3548188 3548191 3548192 3548195 3548202 3548209 3548218 3548219

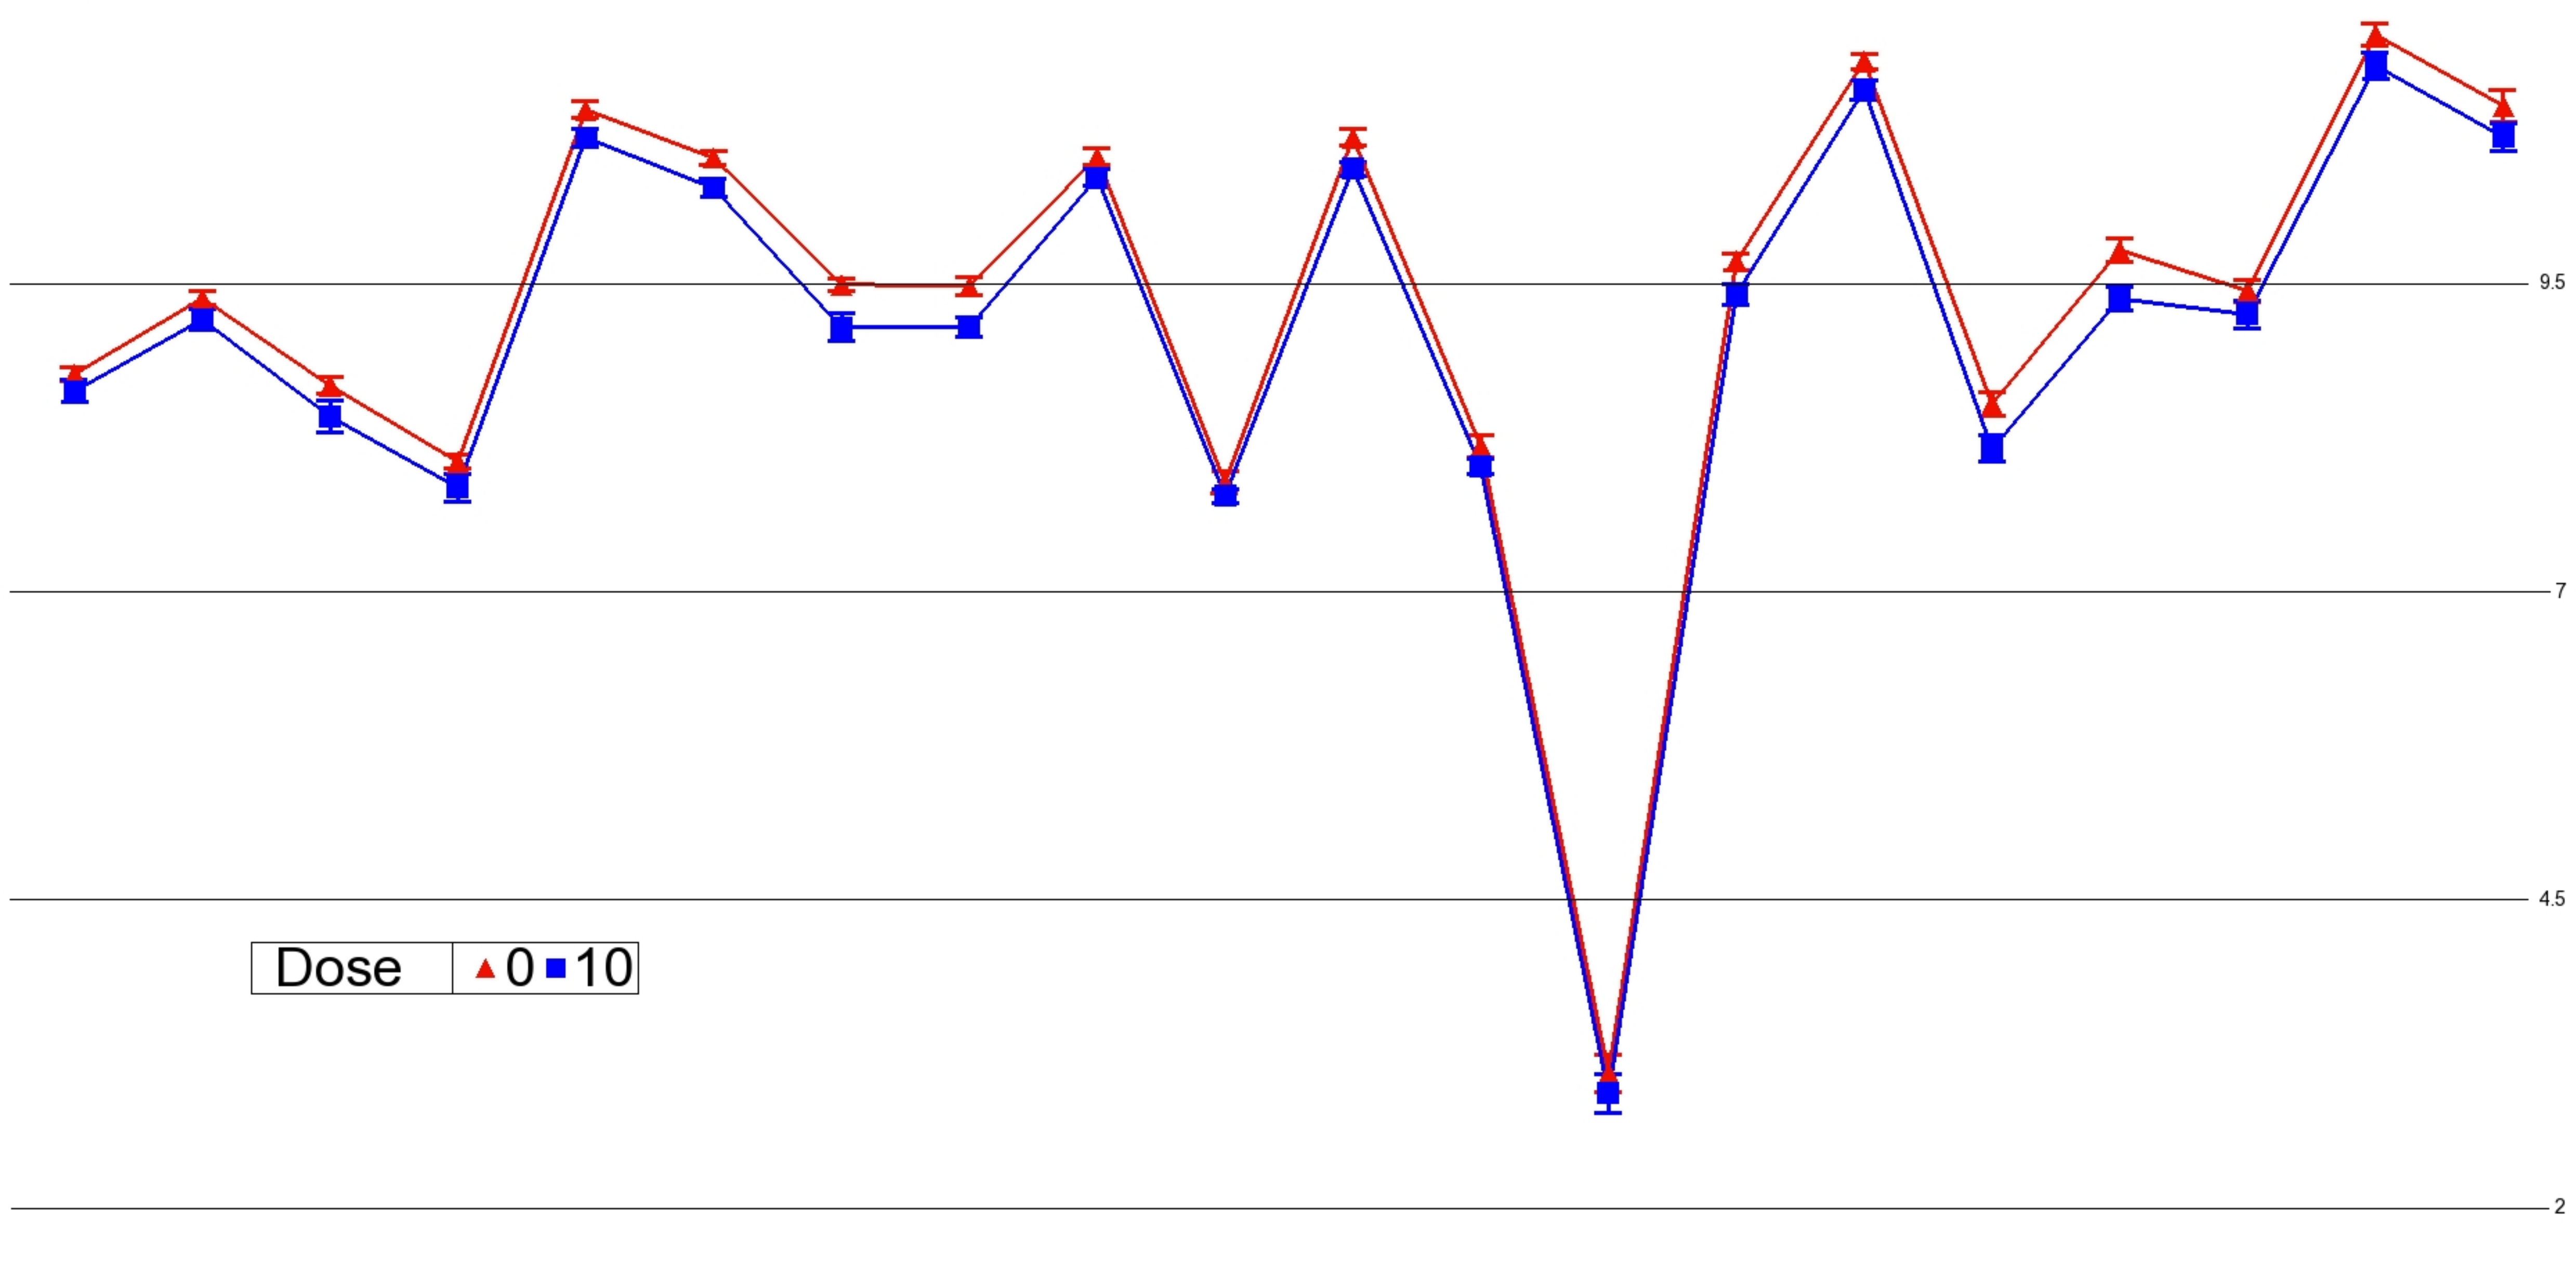

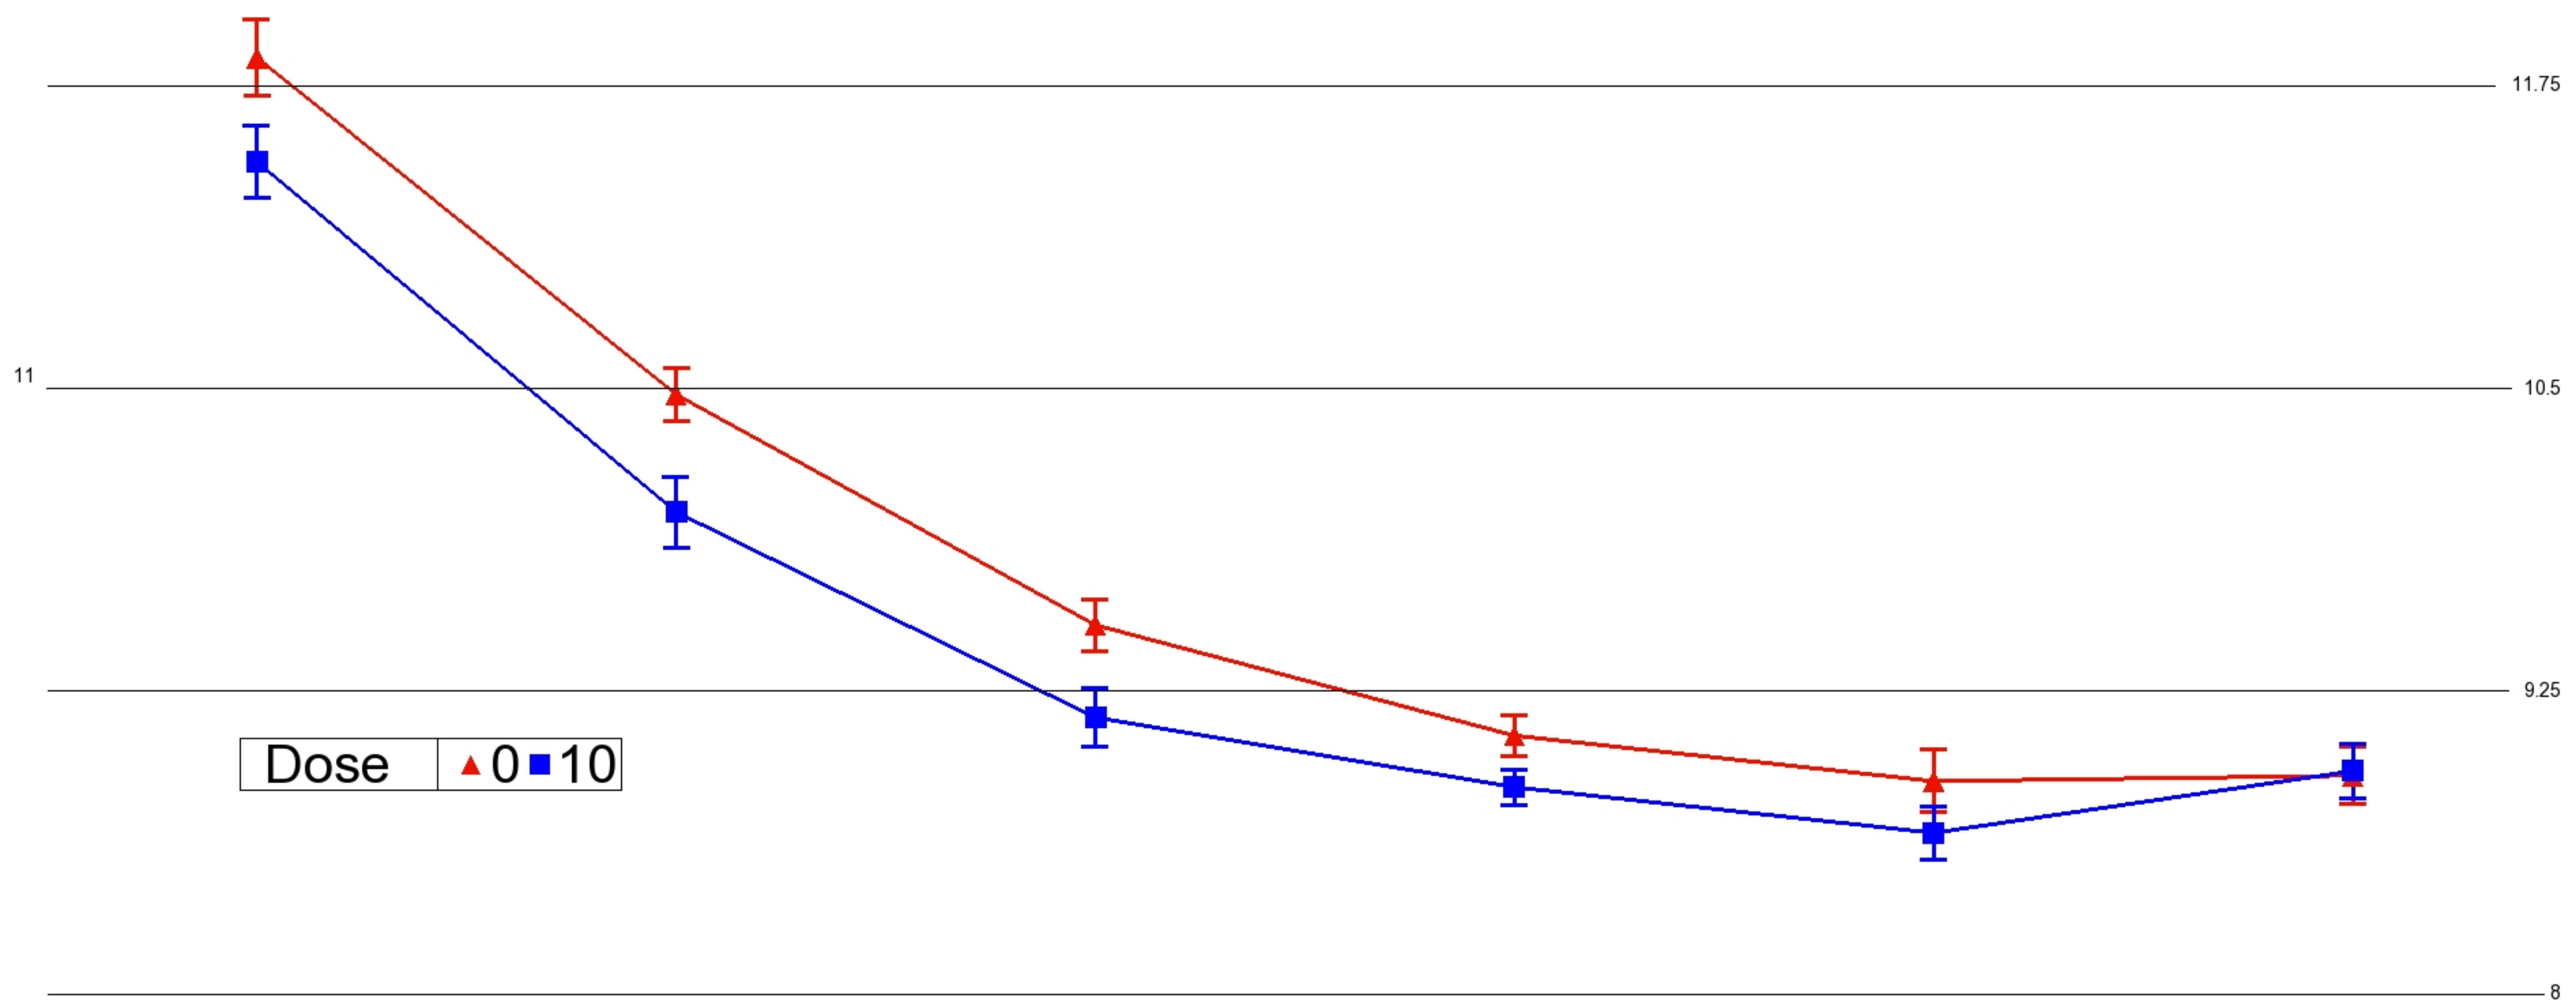

Dose ▲ 0 ■ 10

3394184

3394185

3394186

3394188

3394189

3394190

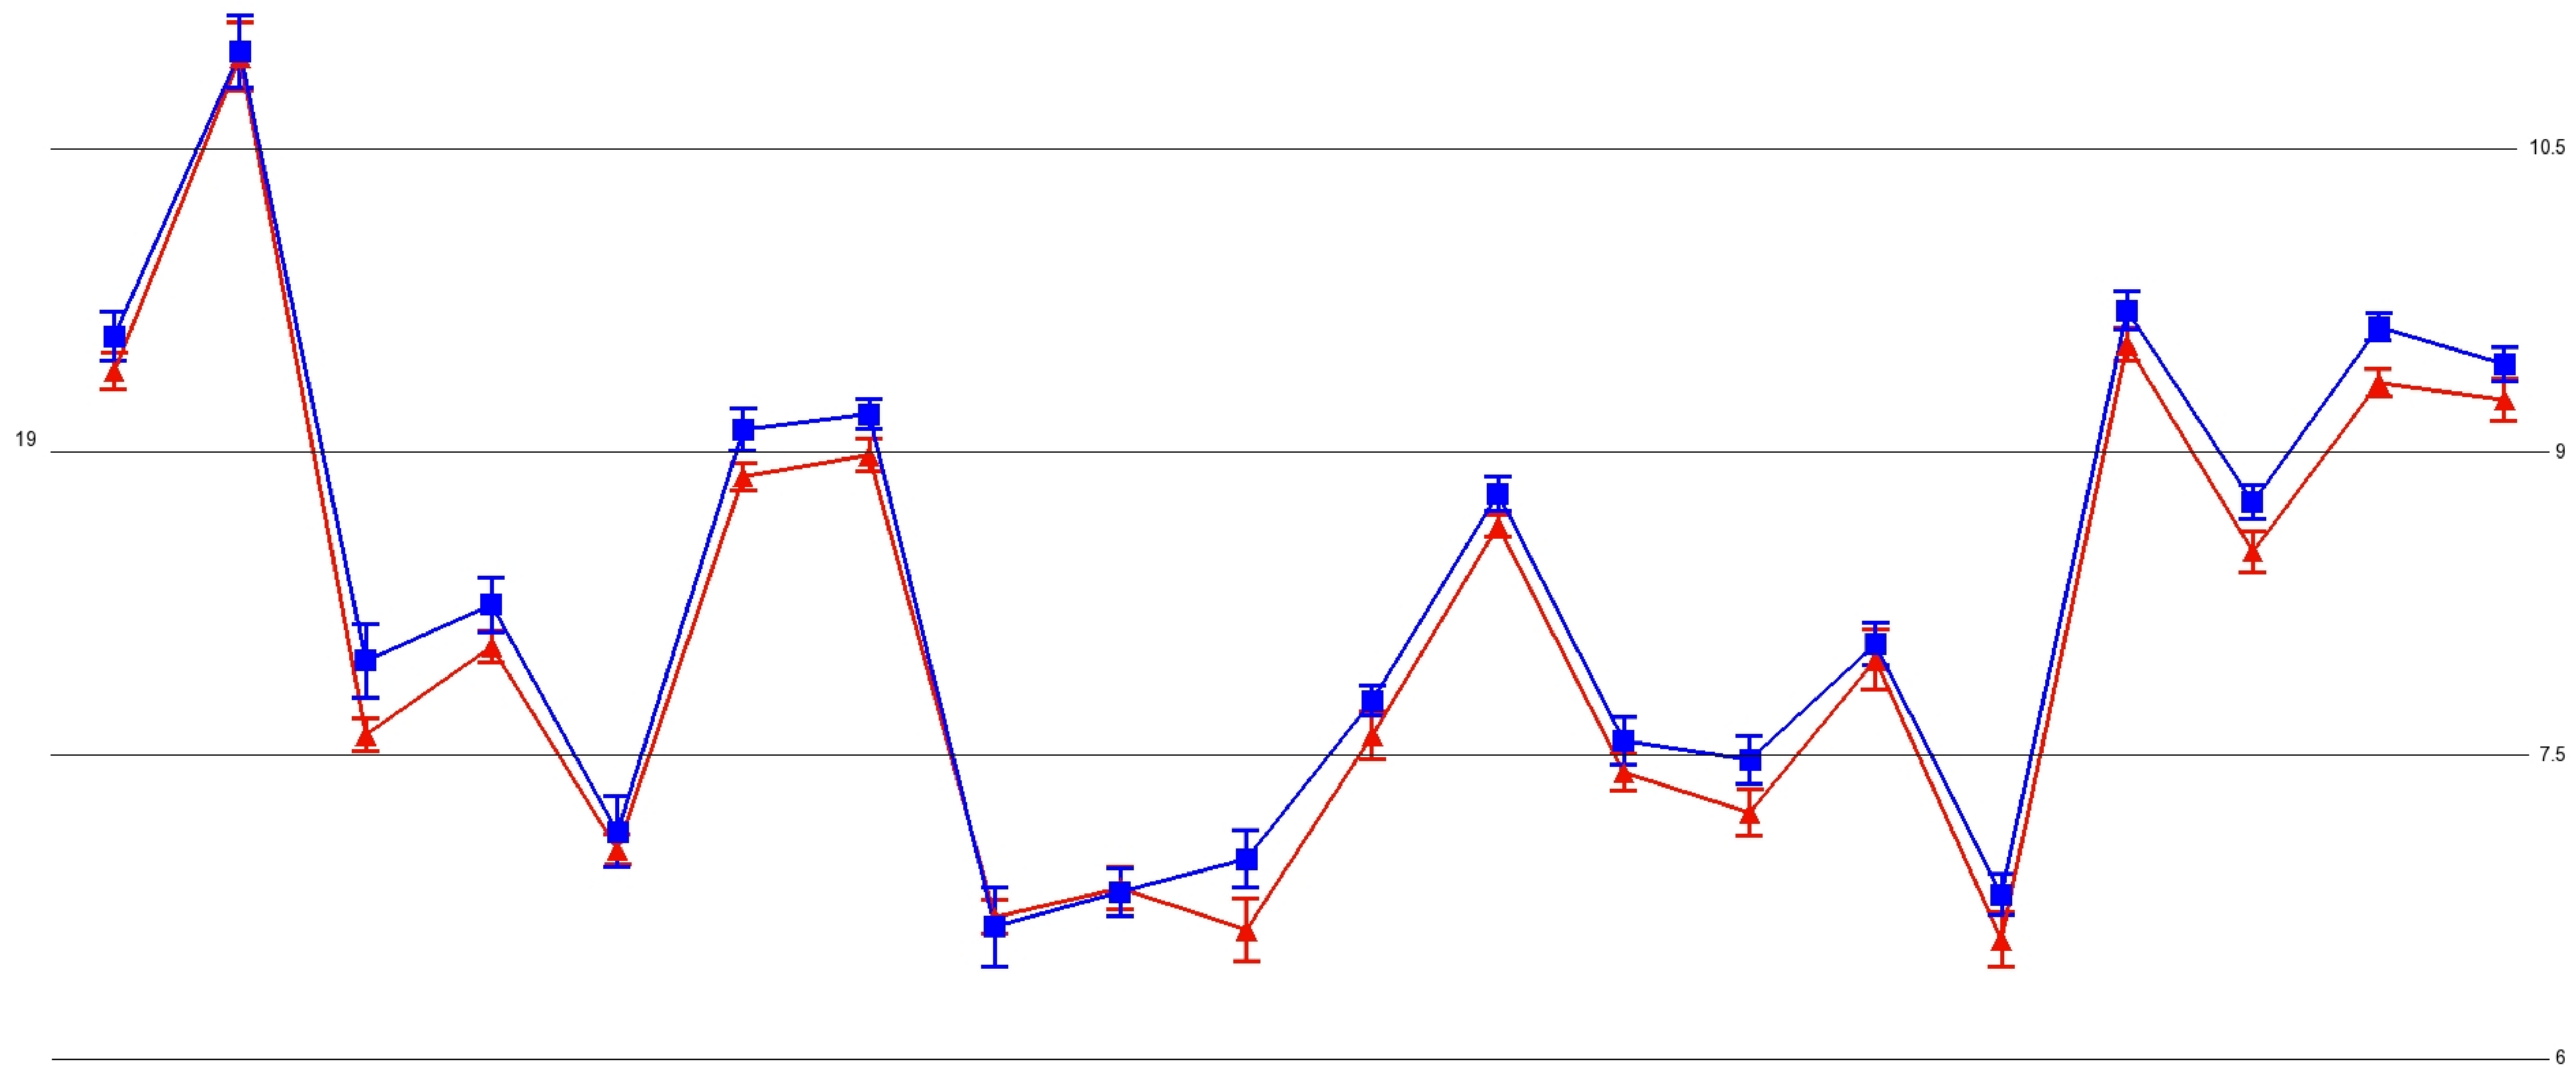

Dose

▲ 0

■ 10

3817502

3817503

3817505

3817507

3817508

3817509

3817510

3817513

3817514

3817519

3817520

3817521

3817523

3817524

3817525

3817526

3817530

3817531

3817532

3817534

6

7.5

9

10.5

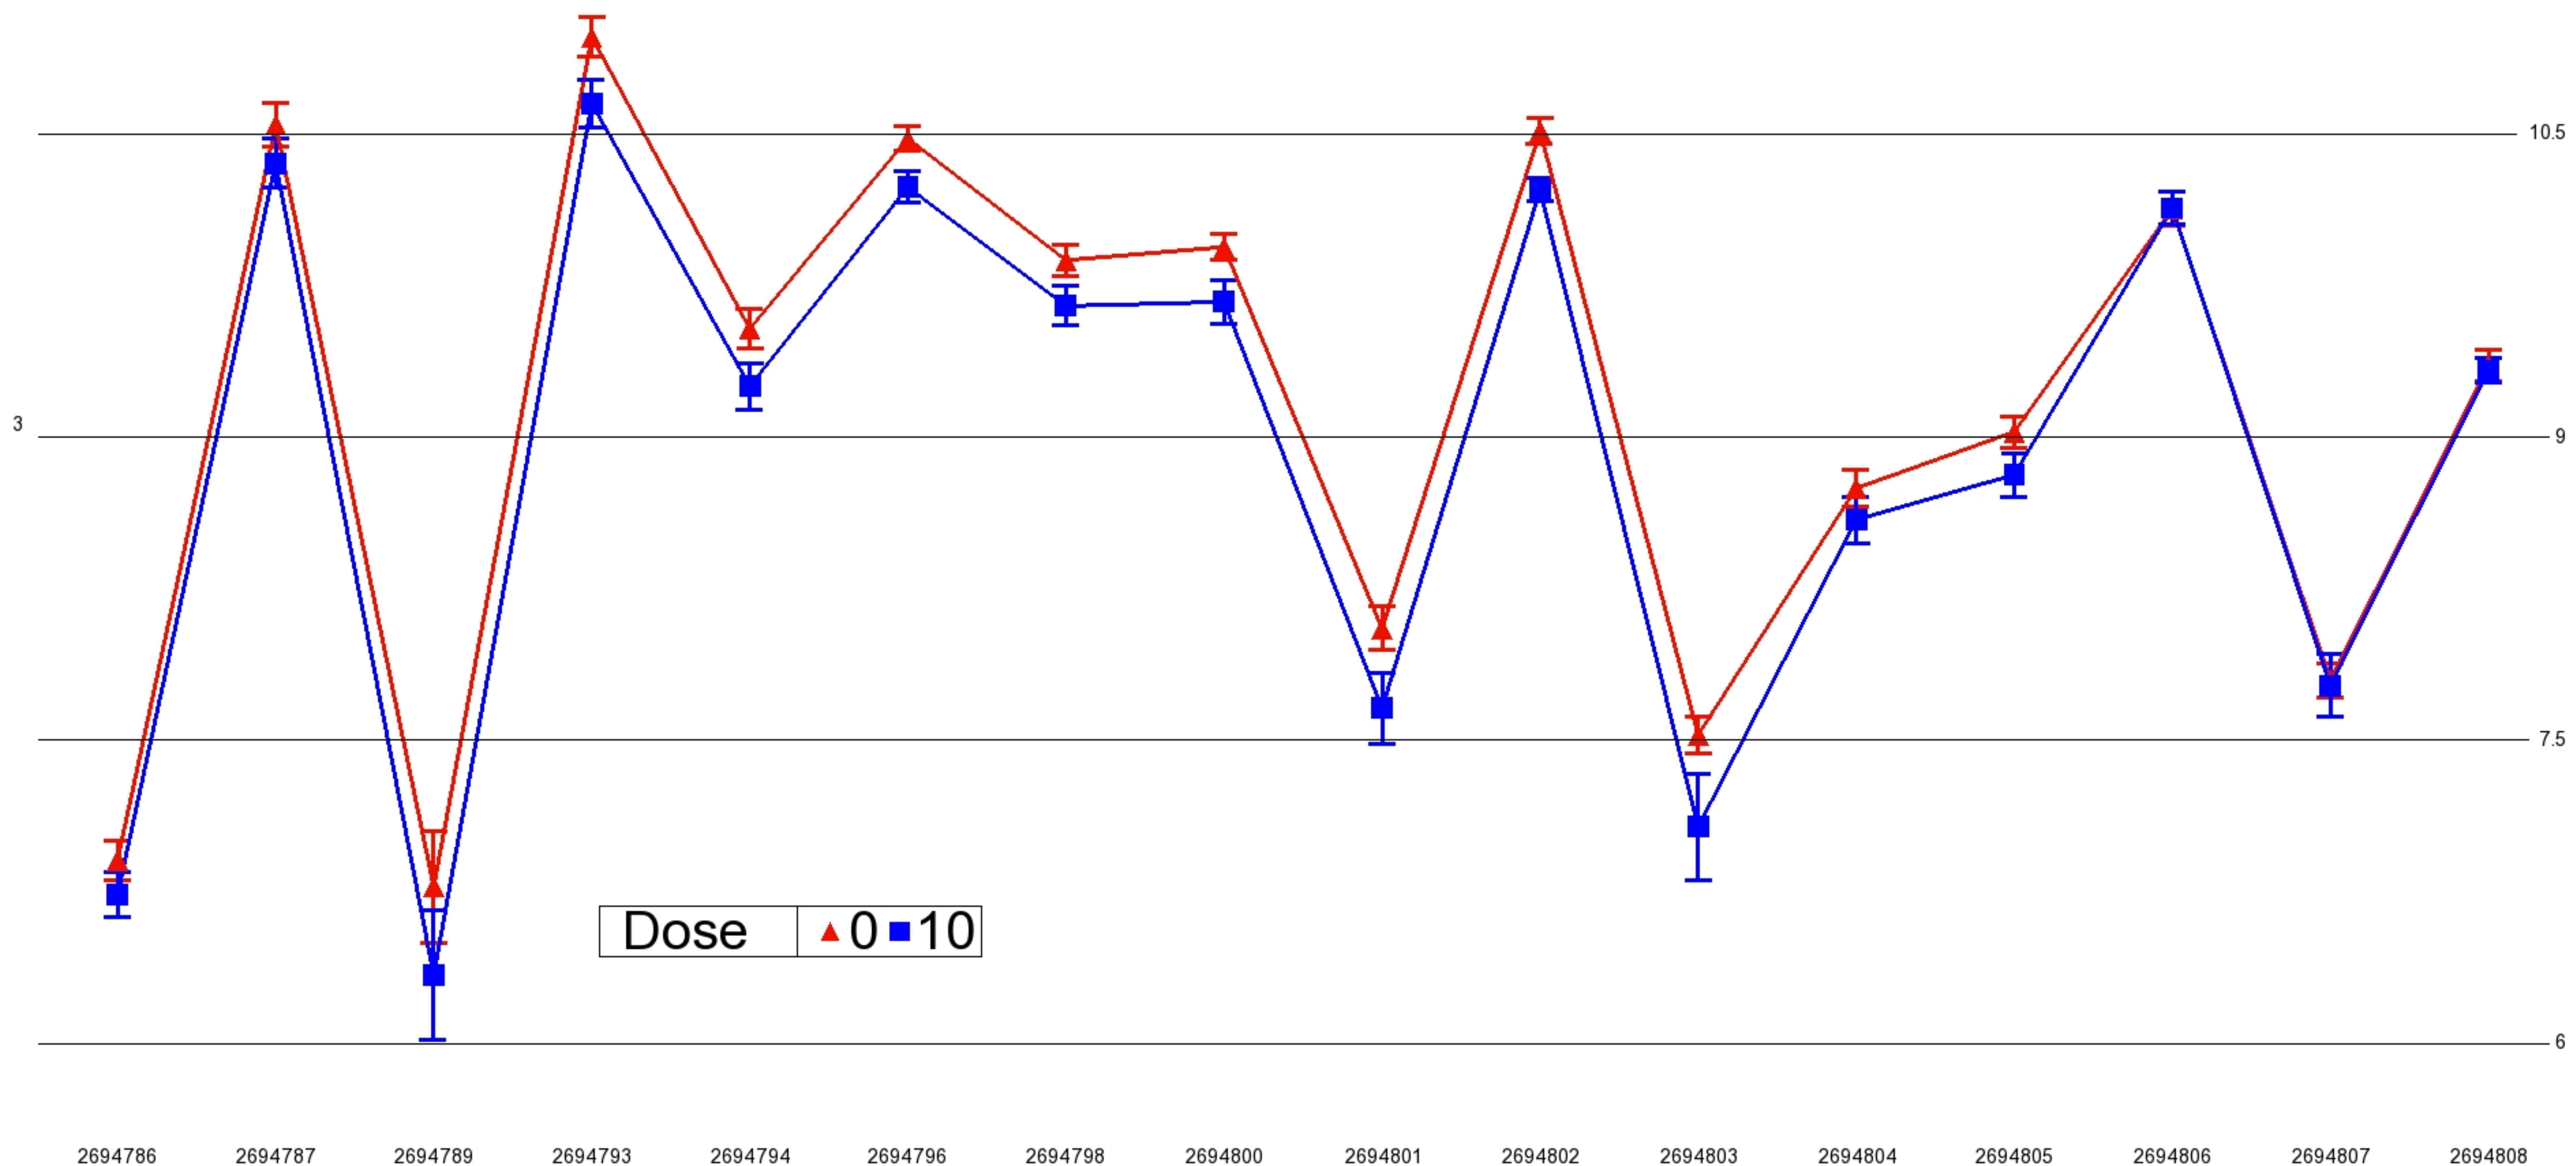



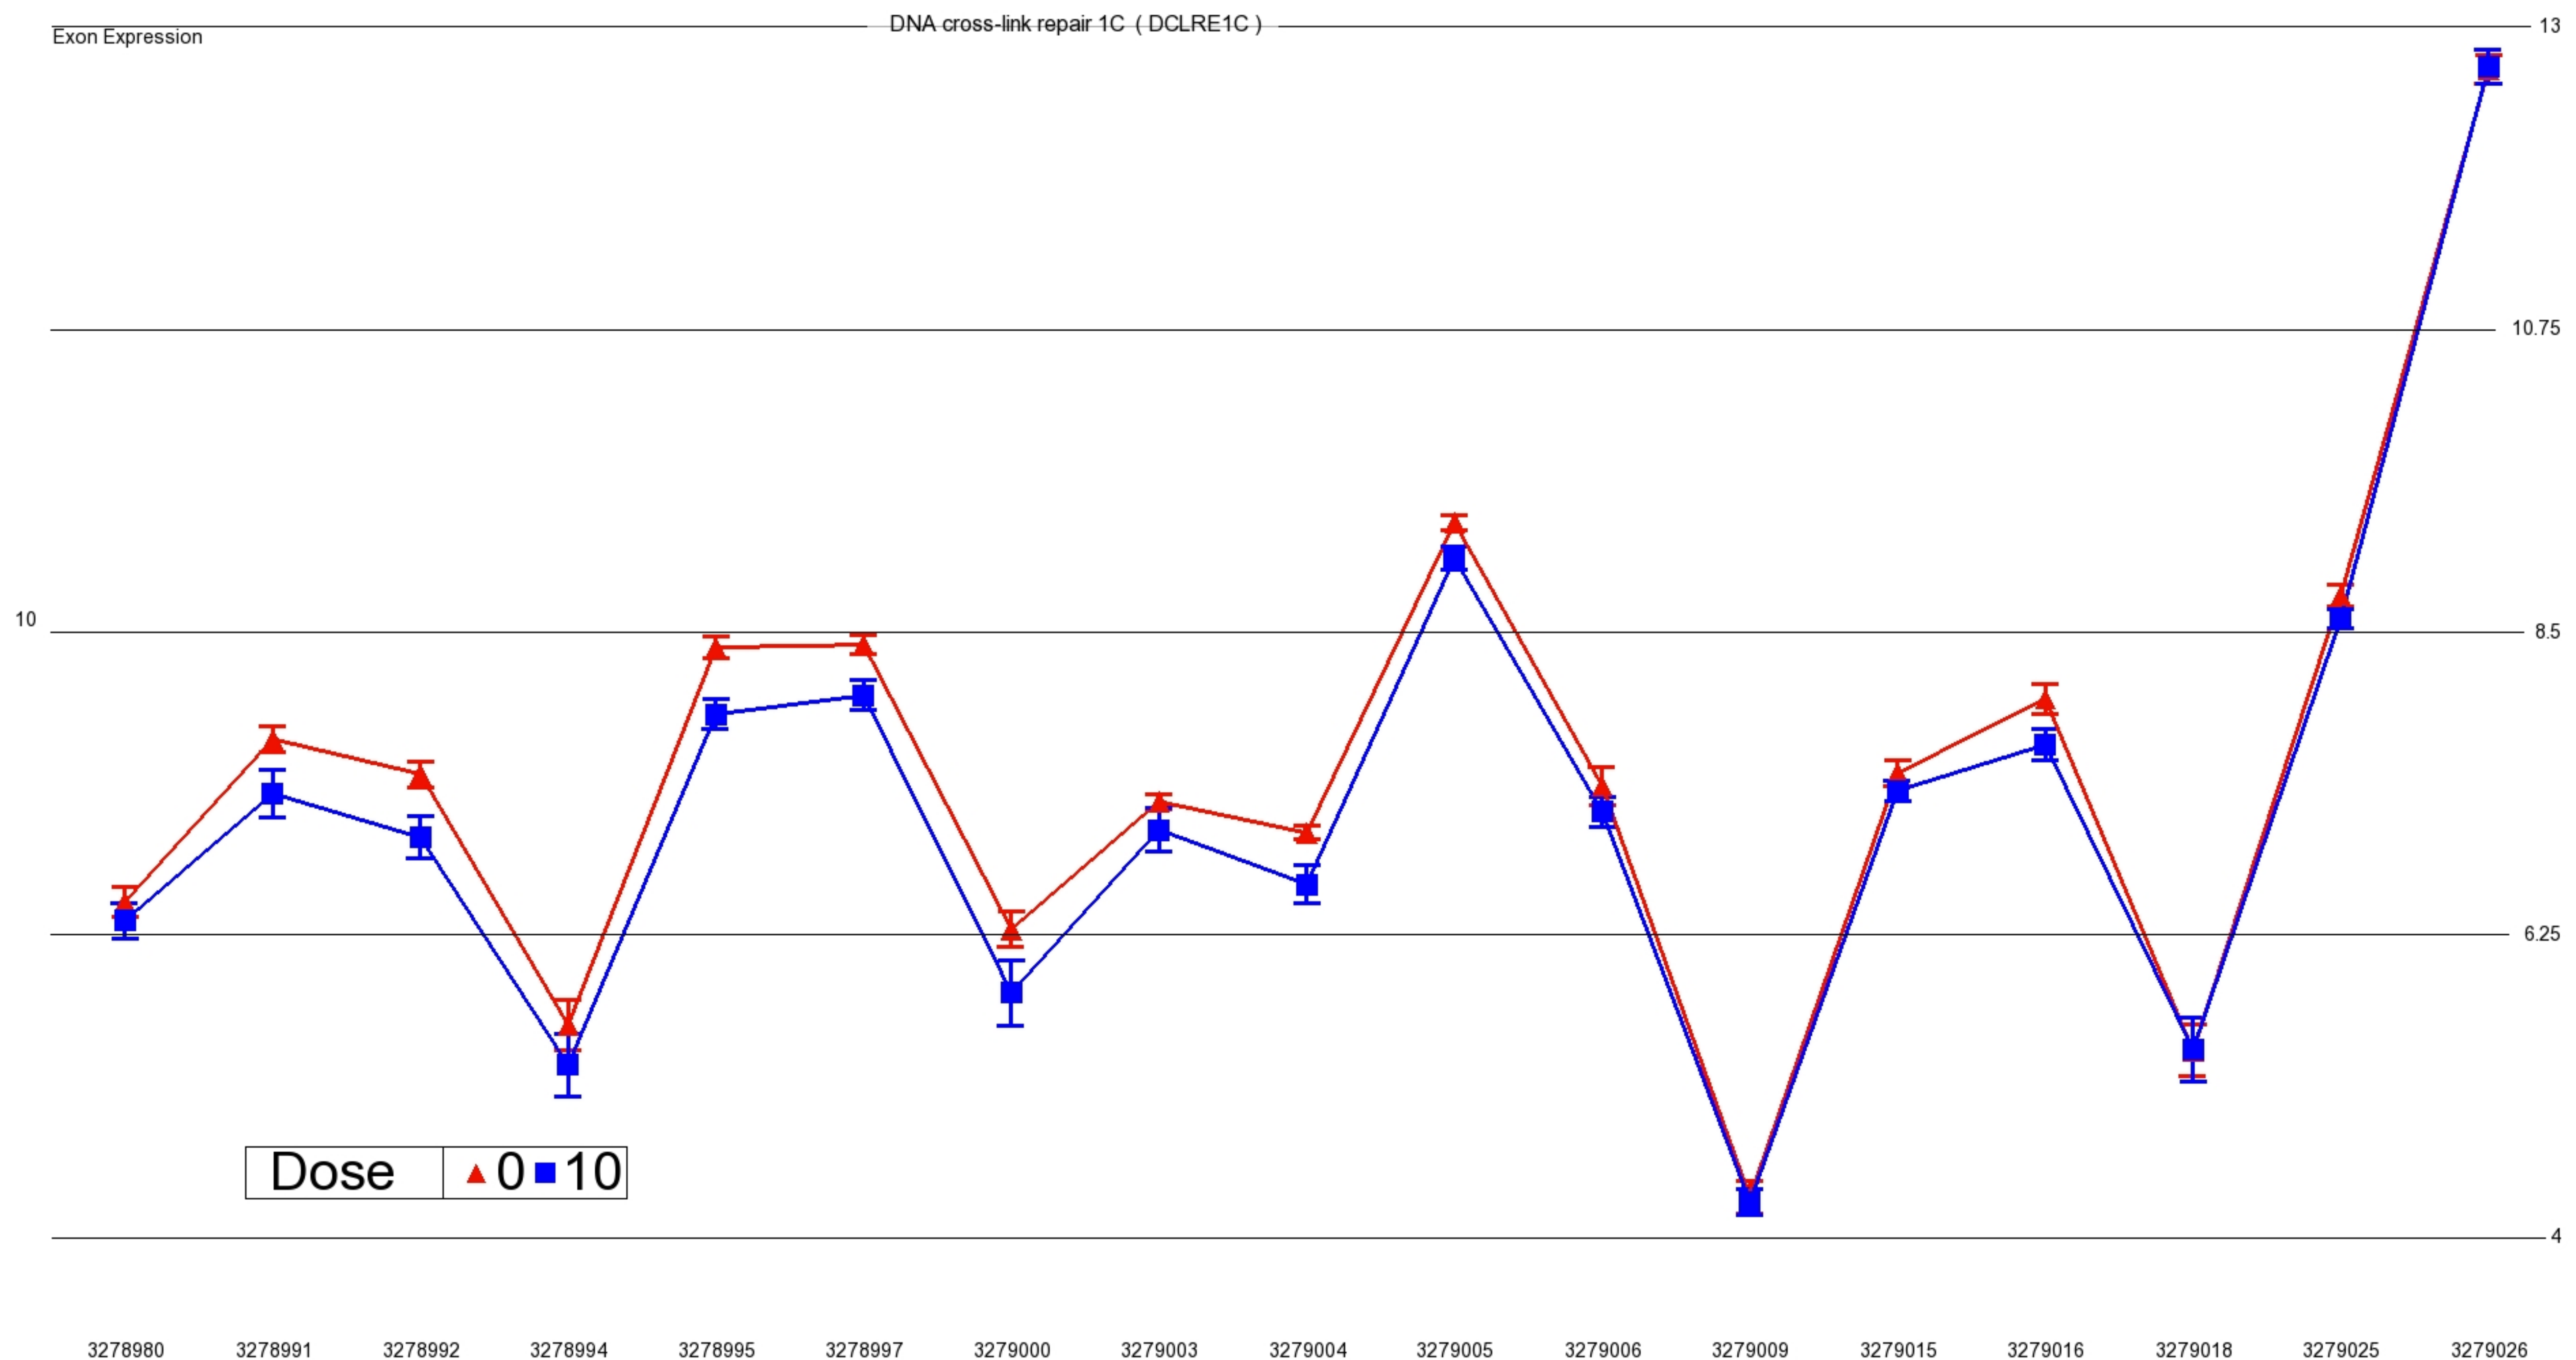

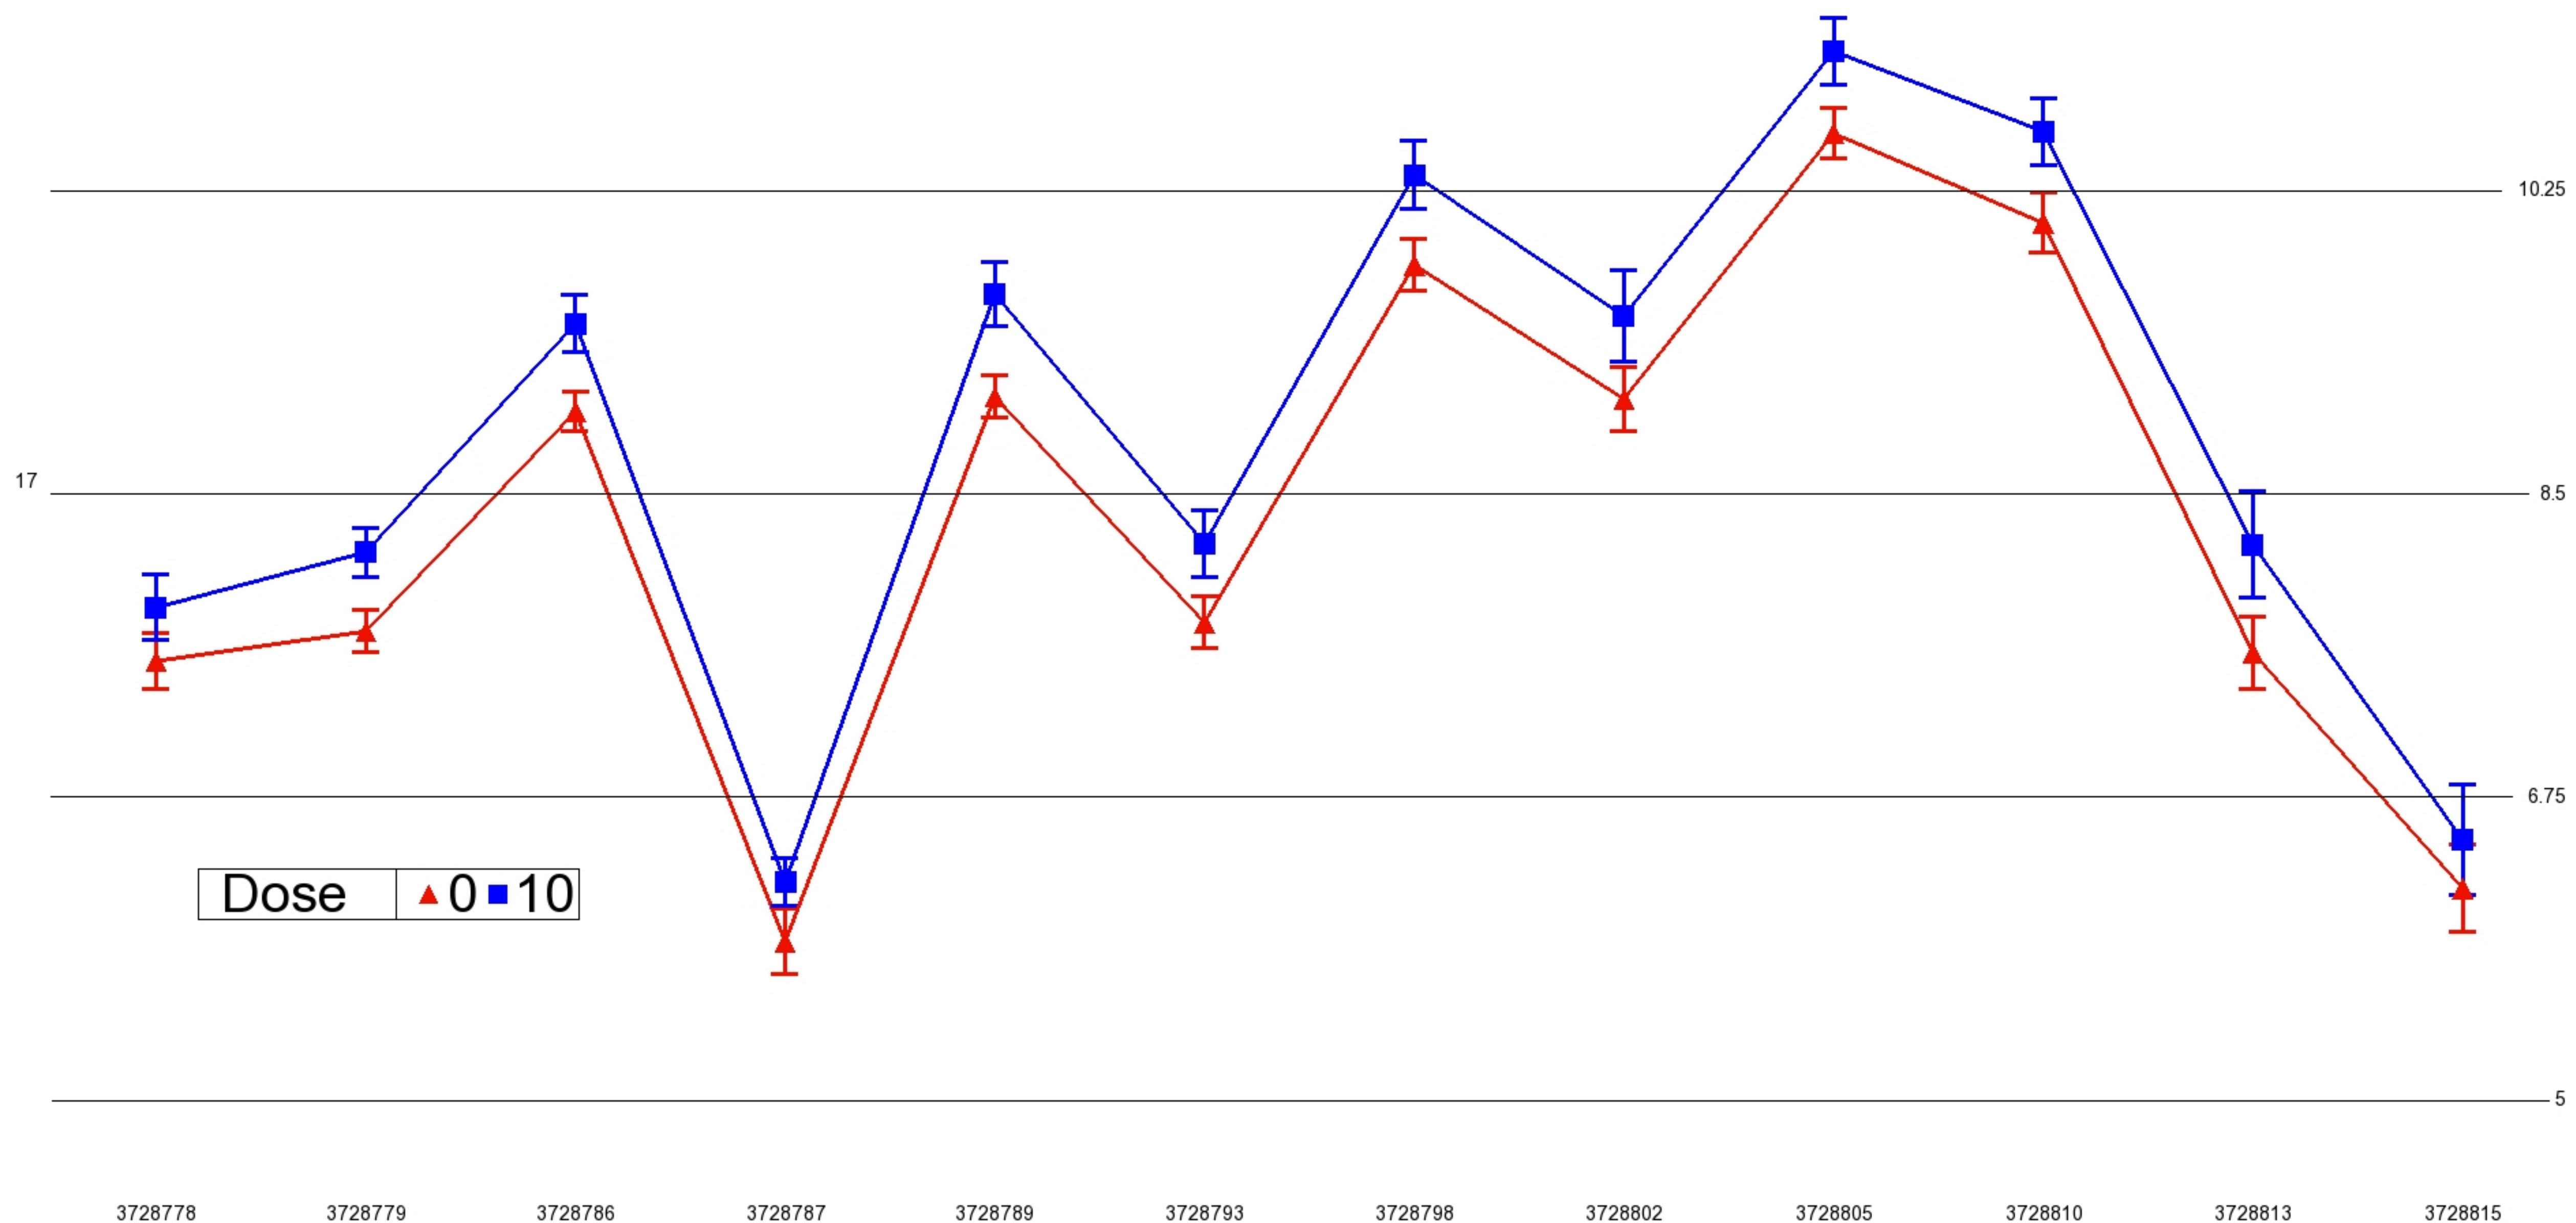

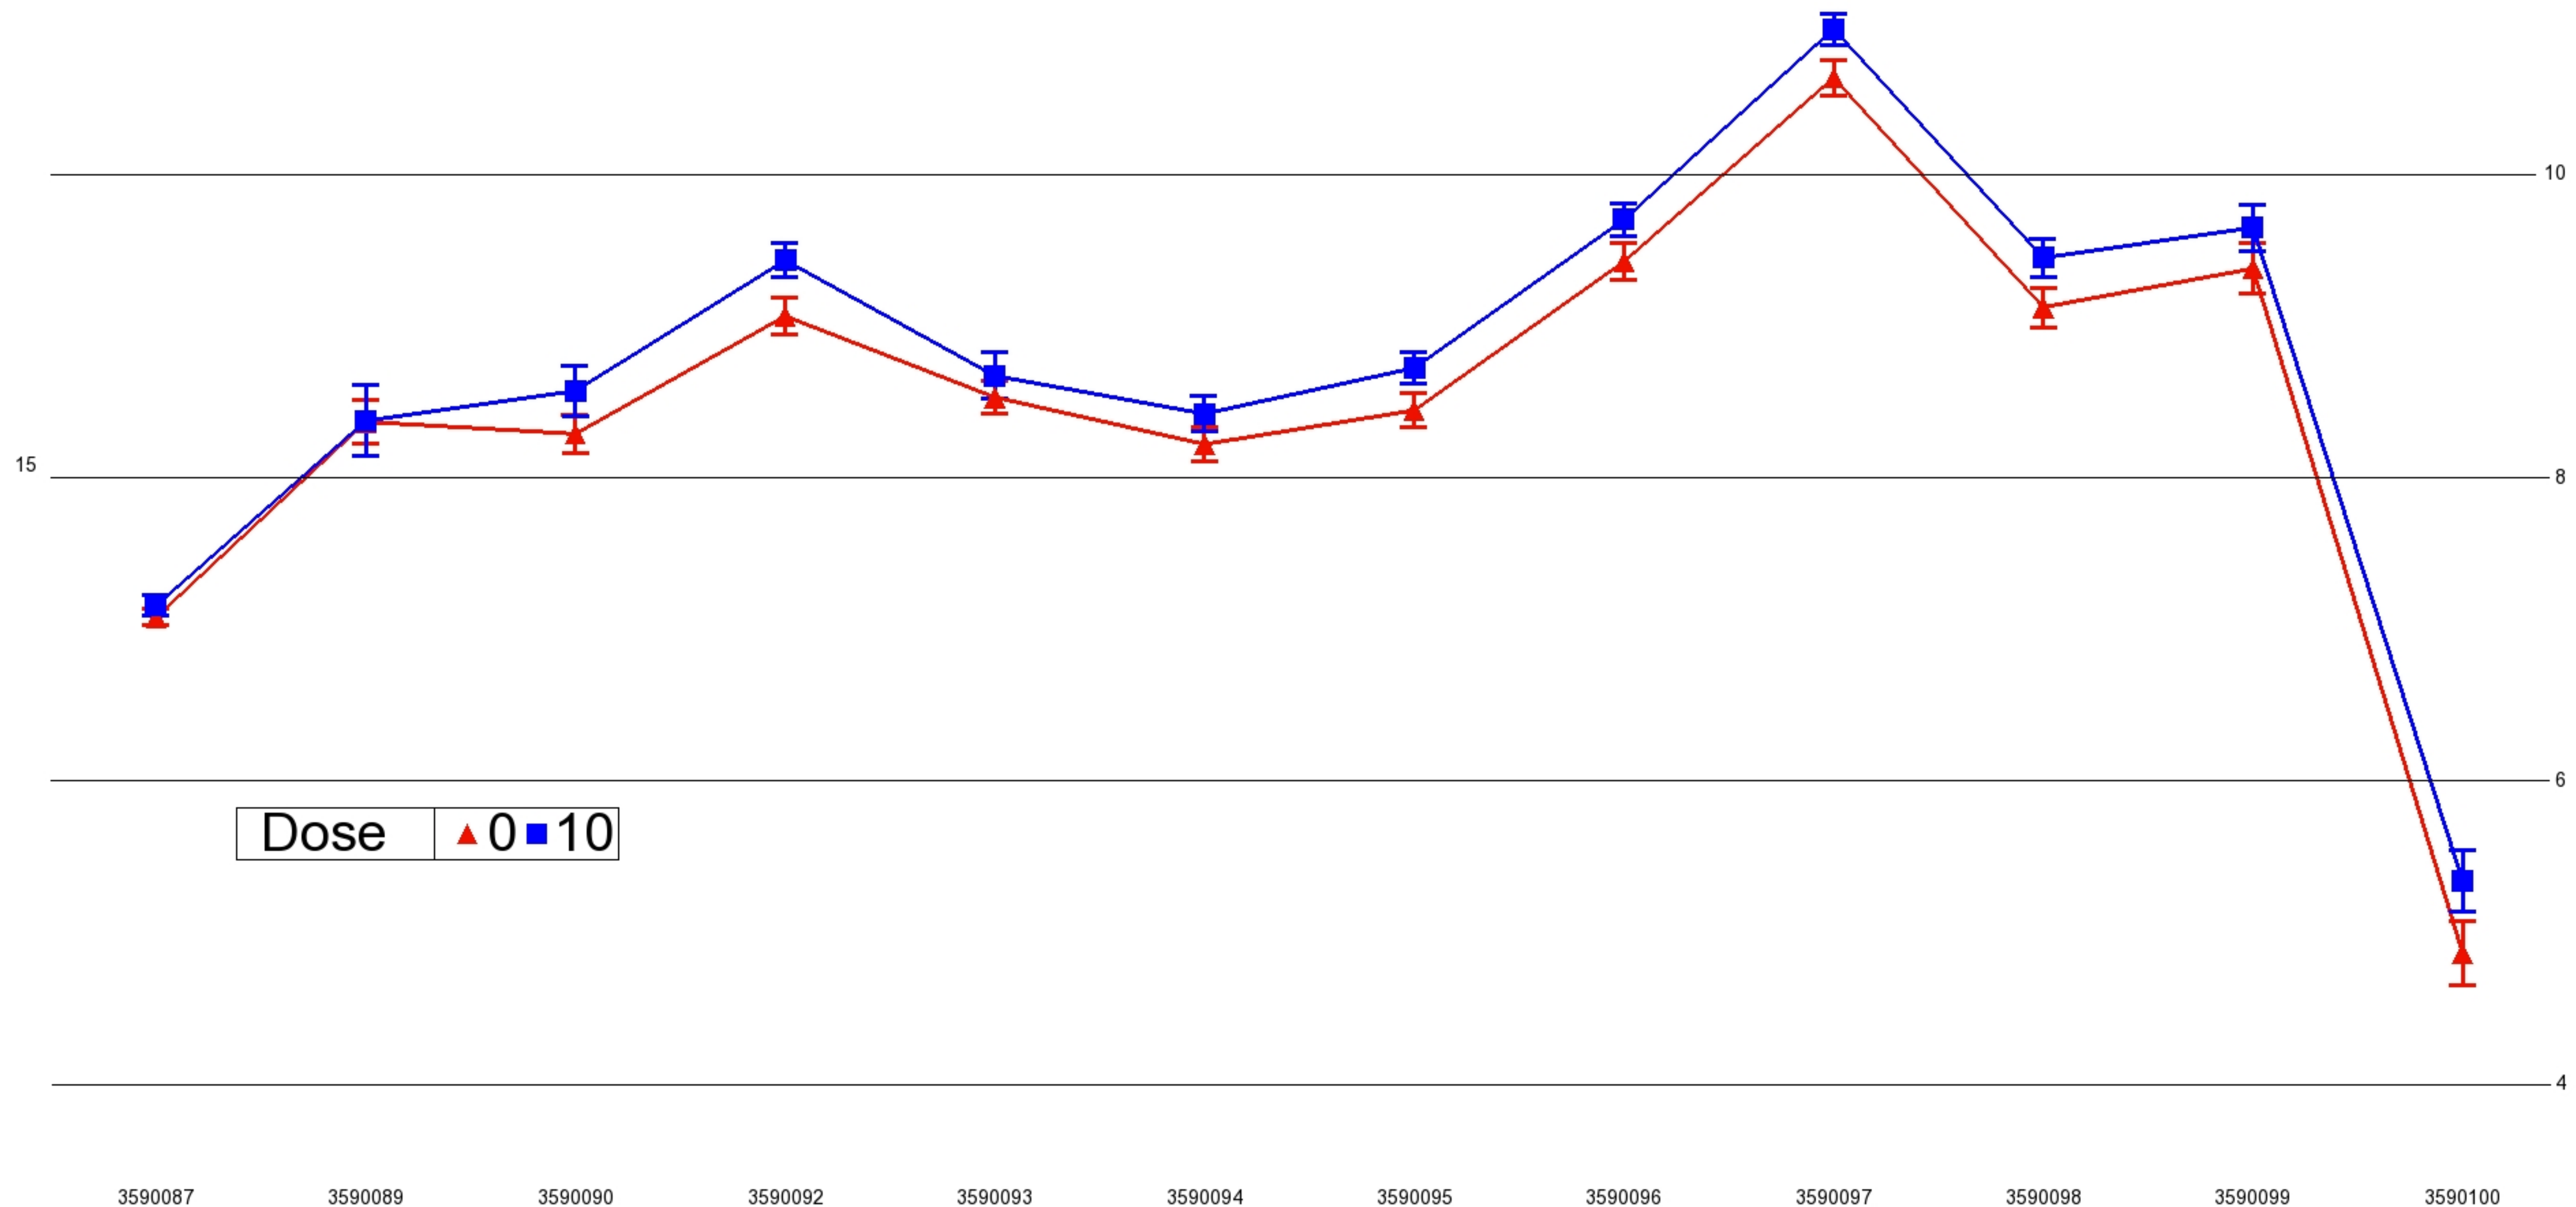

Dose

▲ 0

■ 10



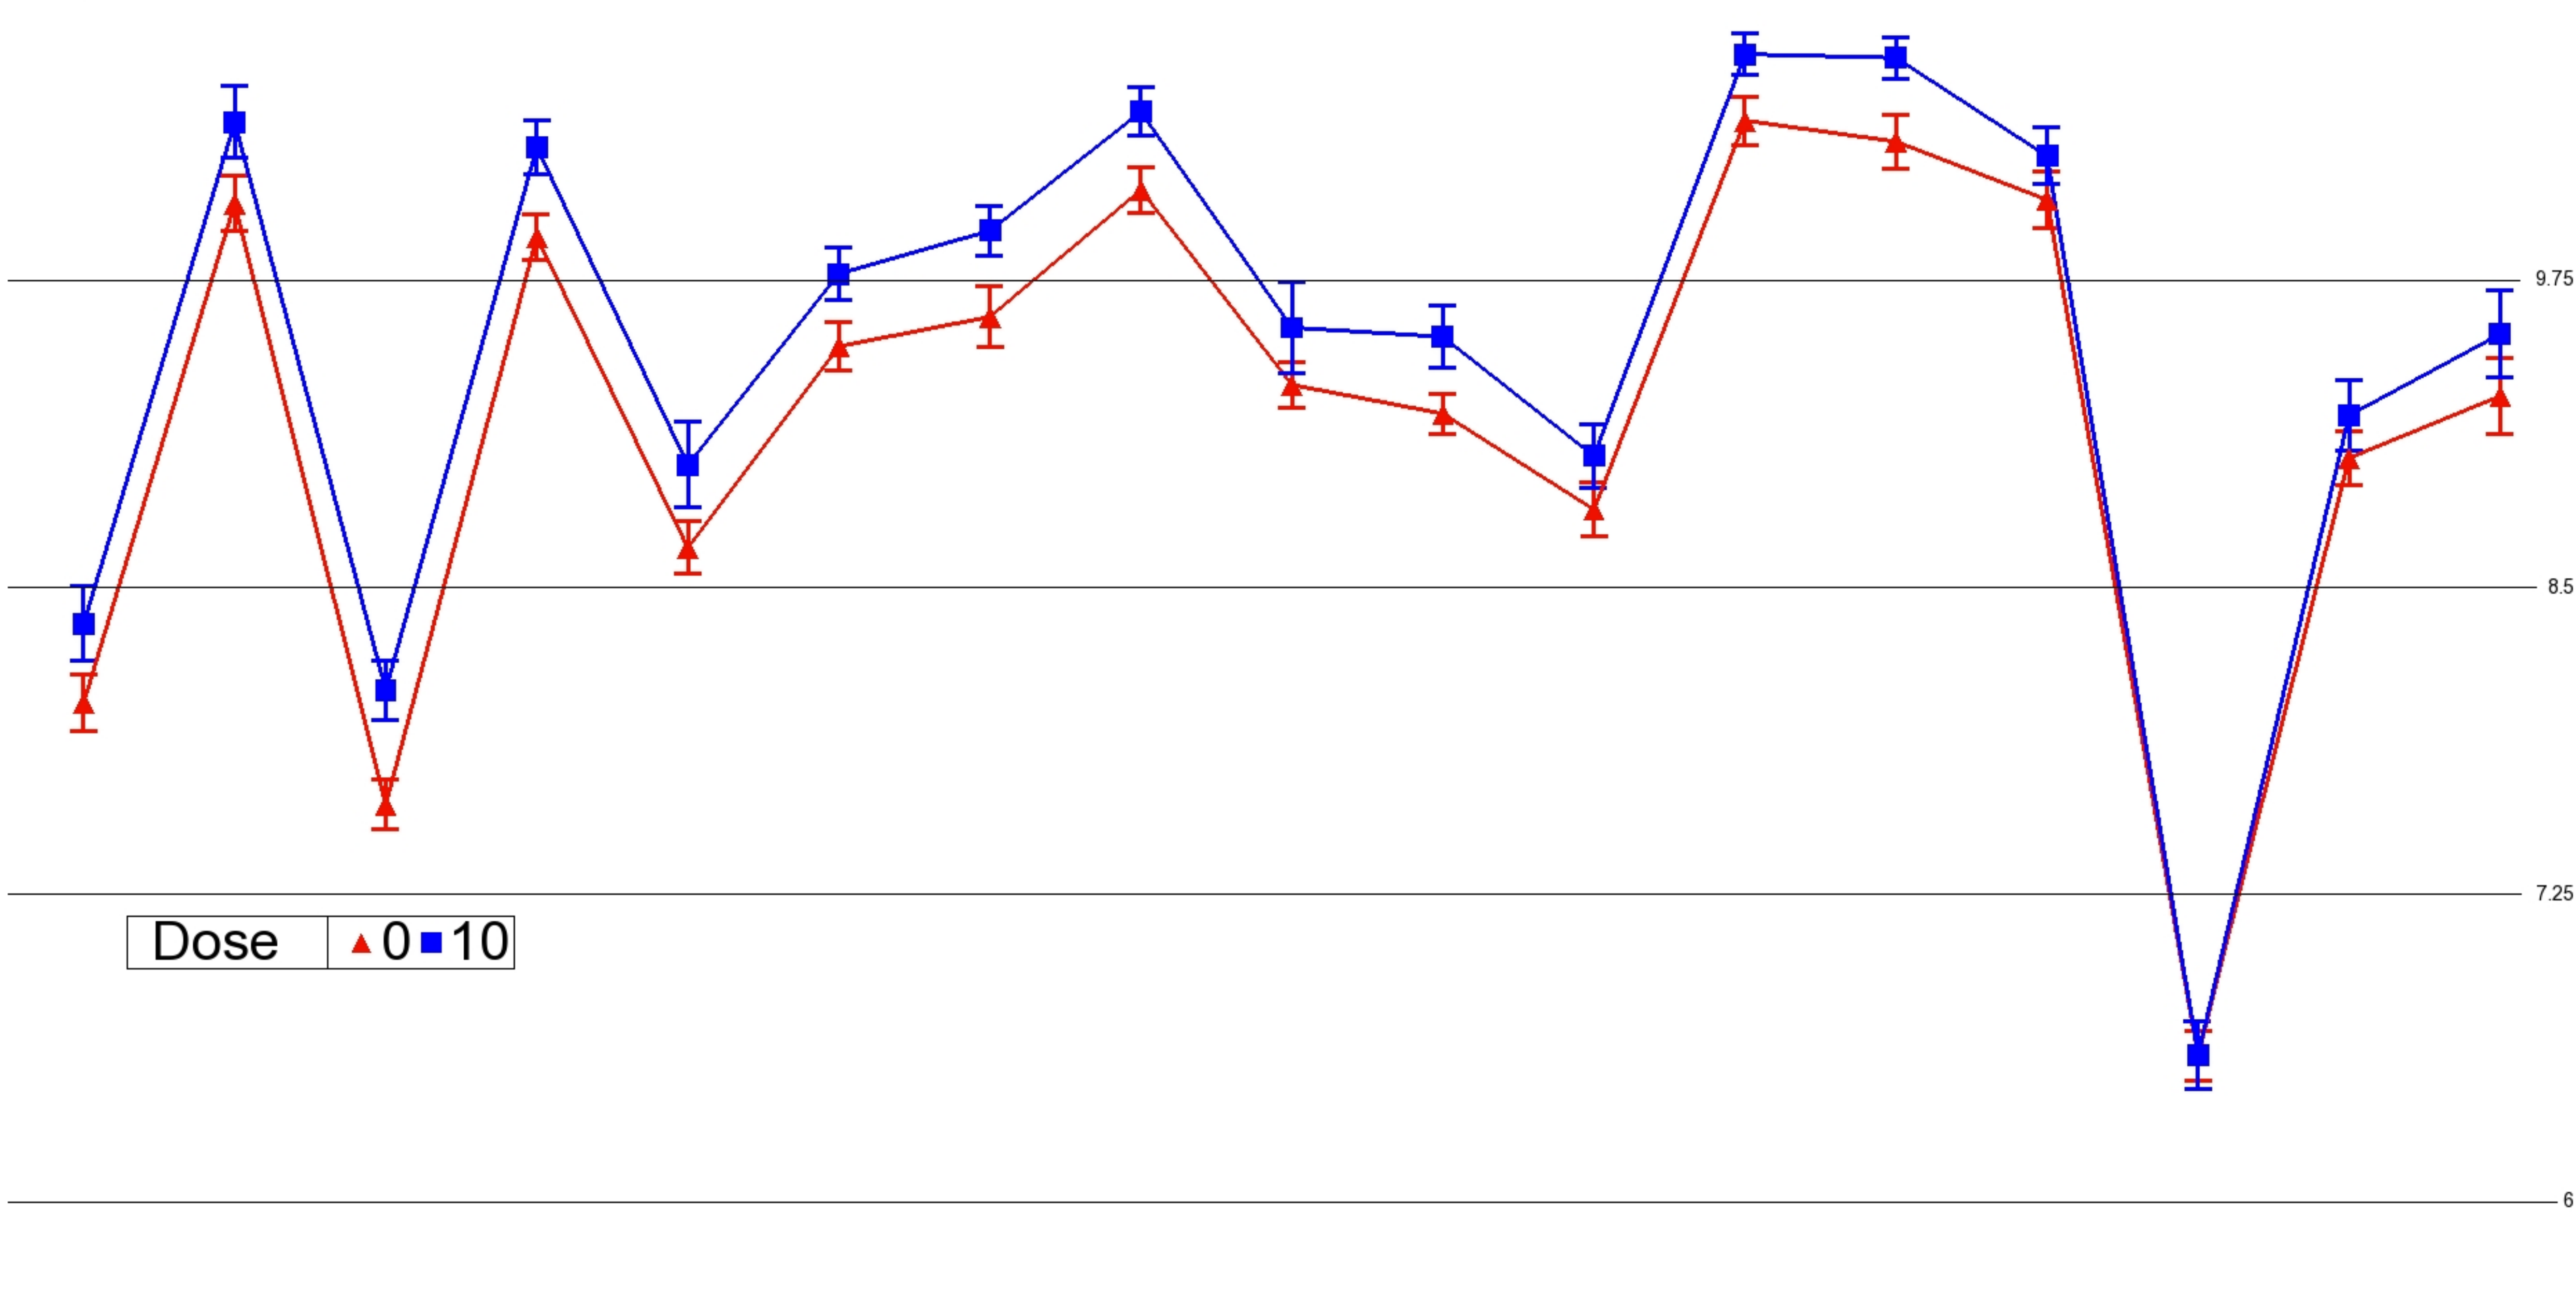

Dose ▲ 0 ■ 10

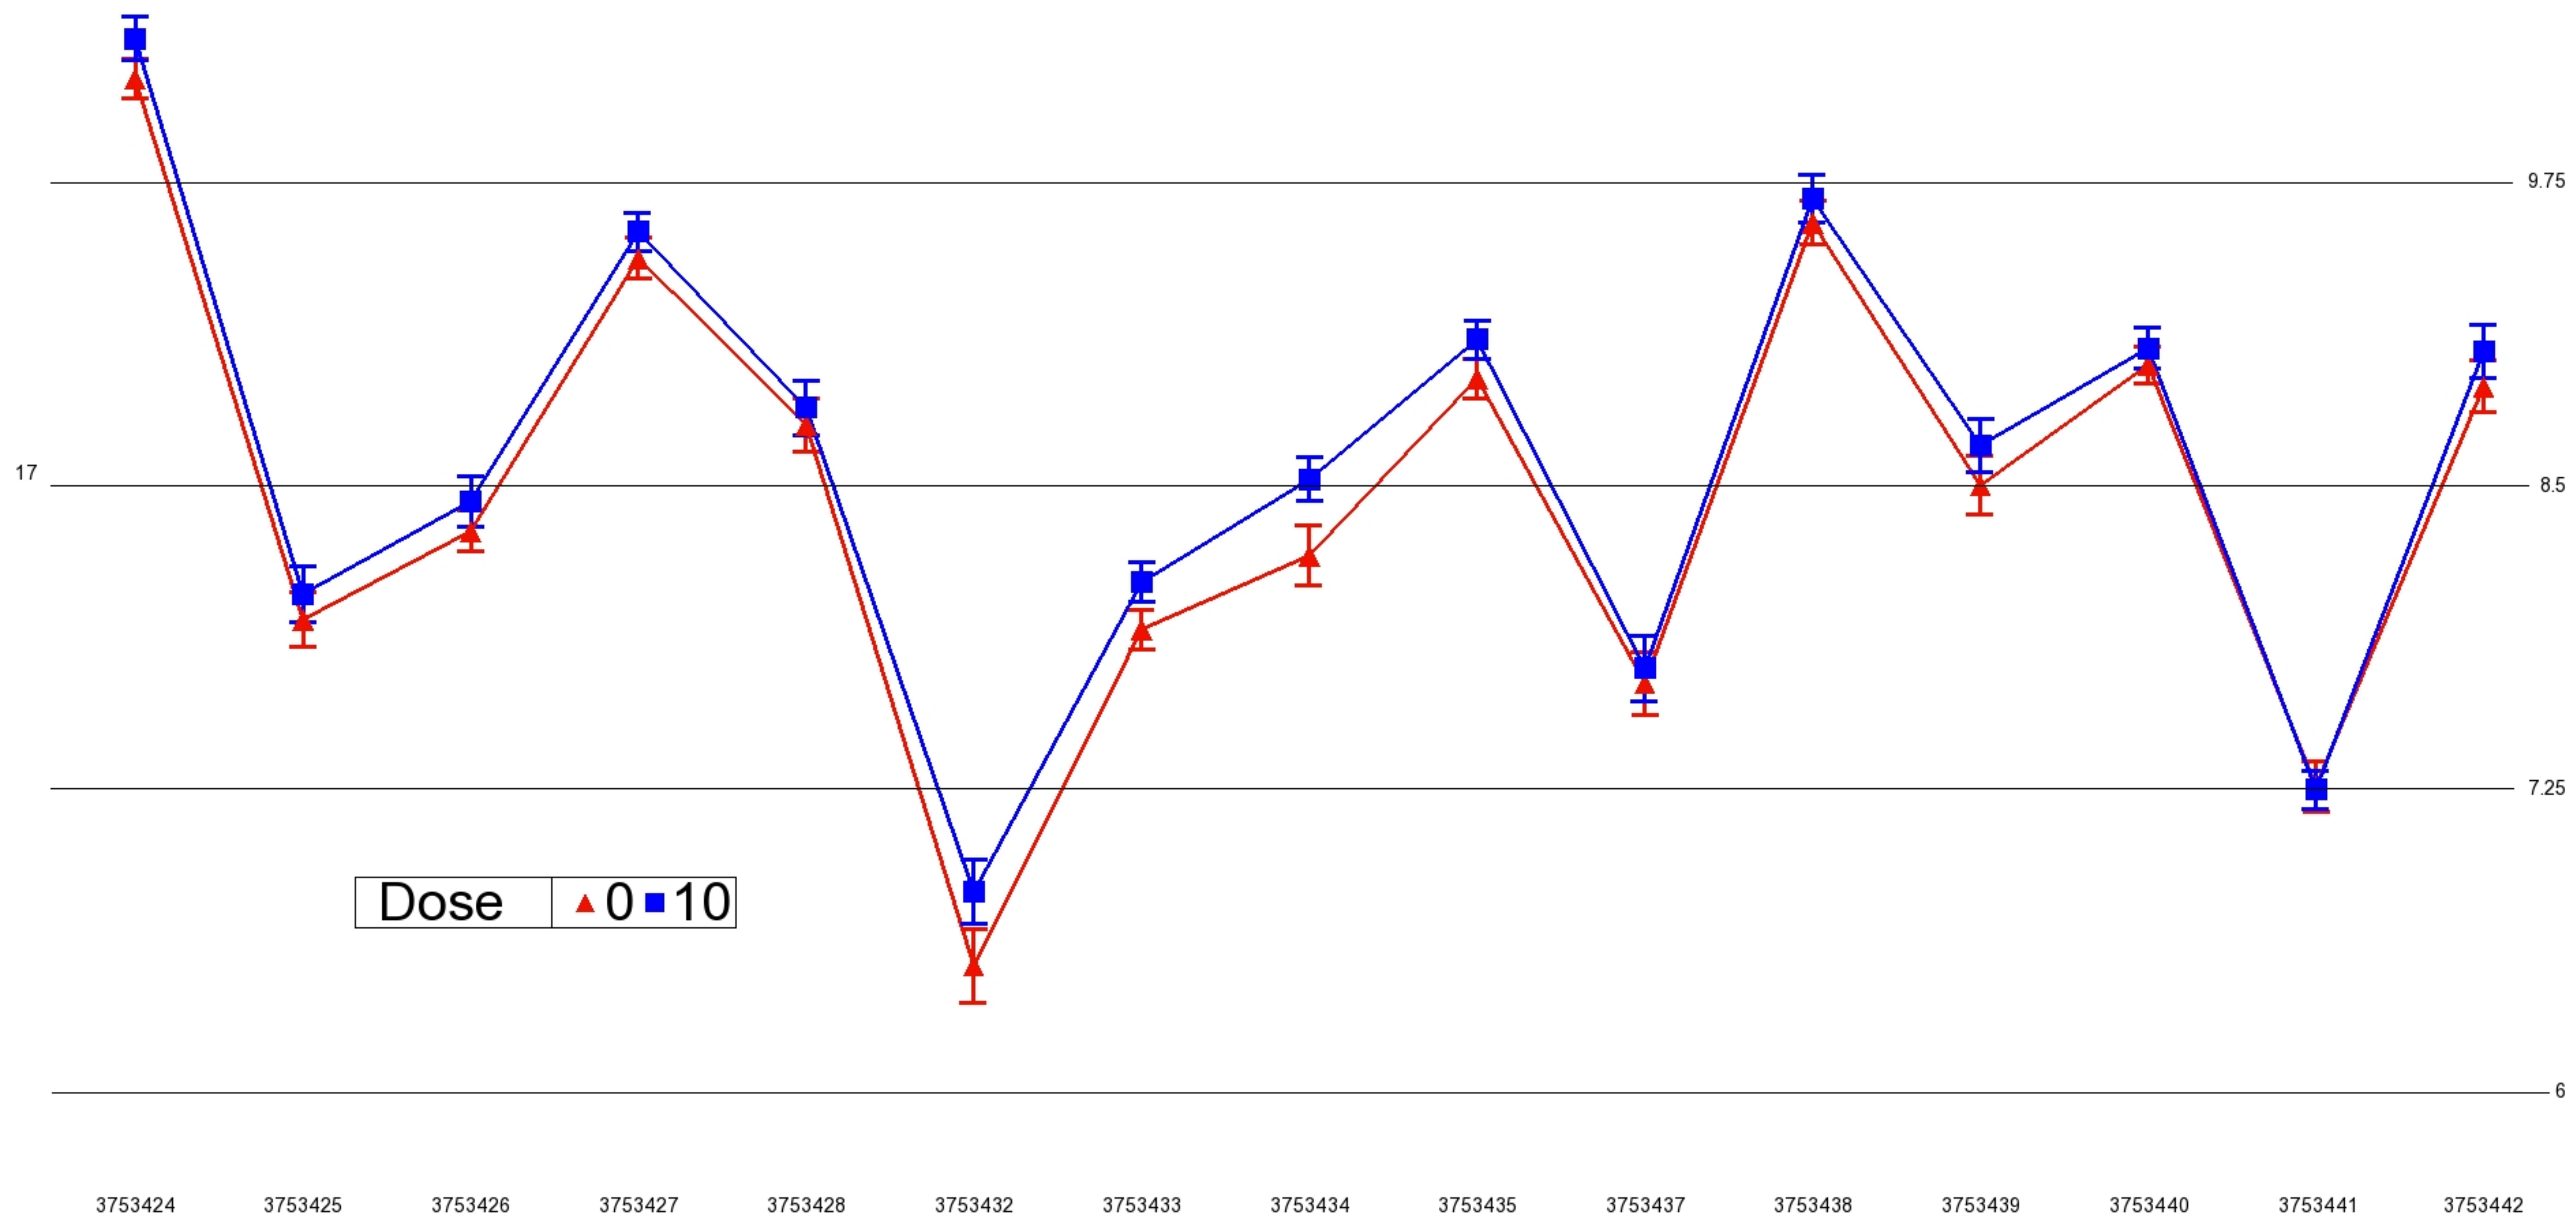

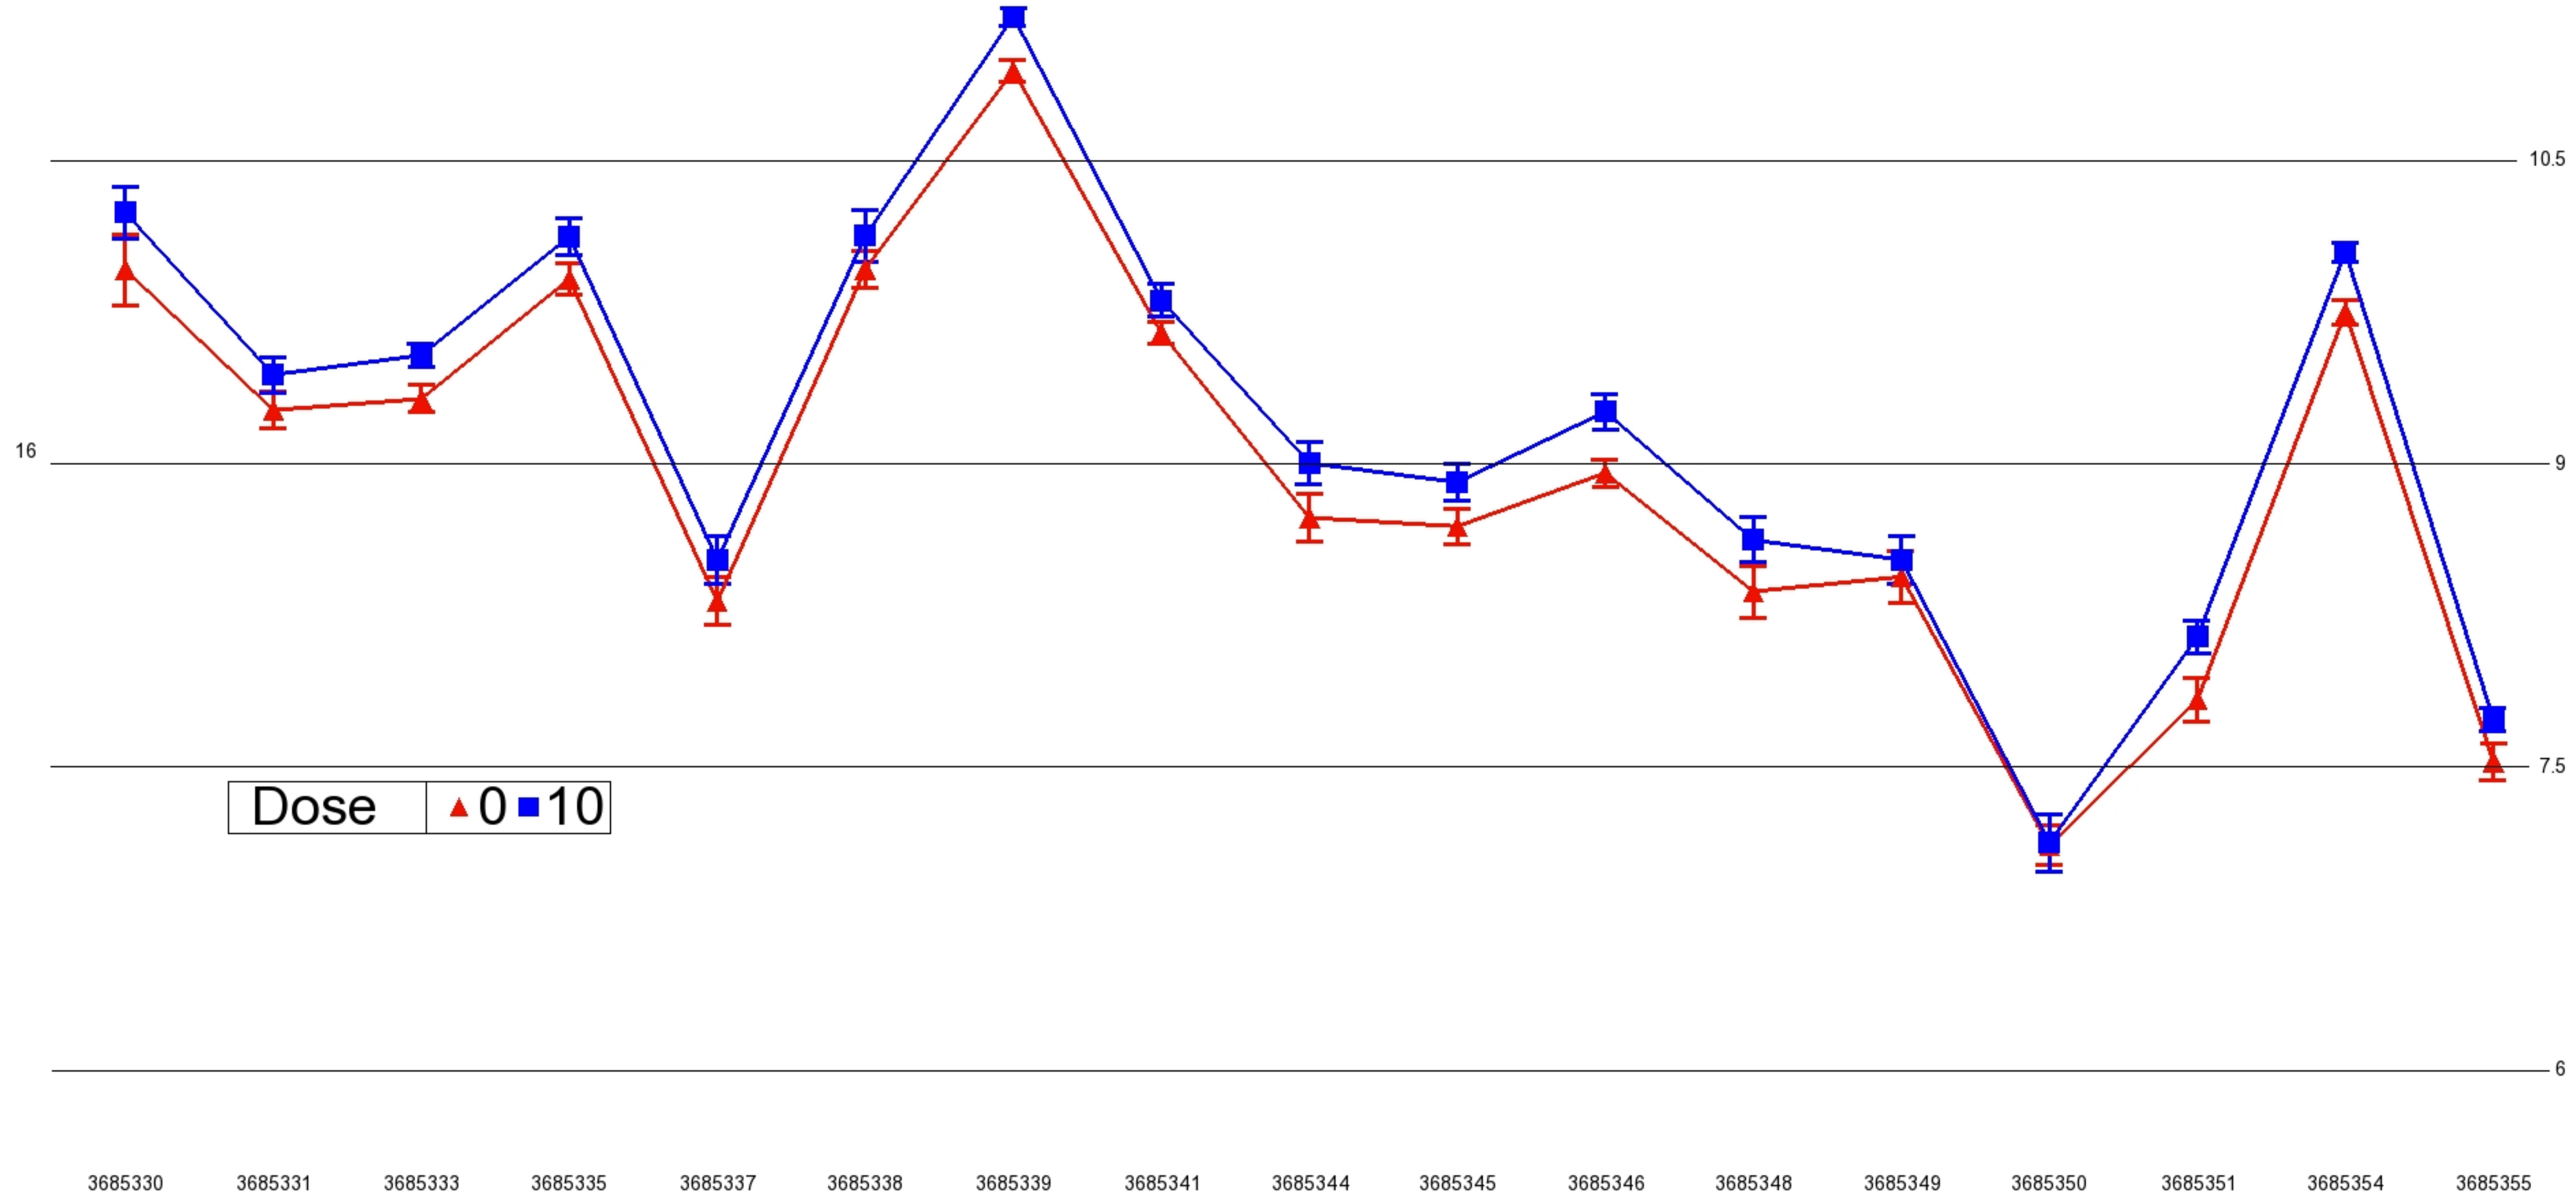

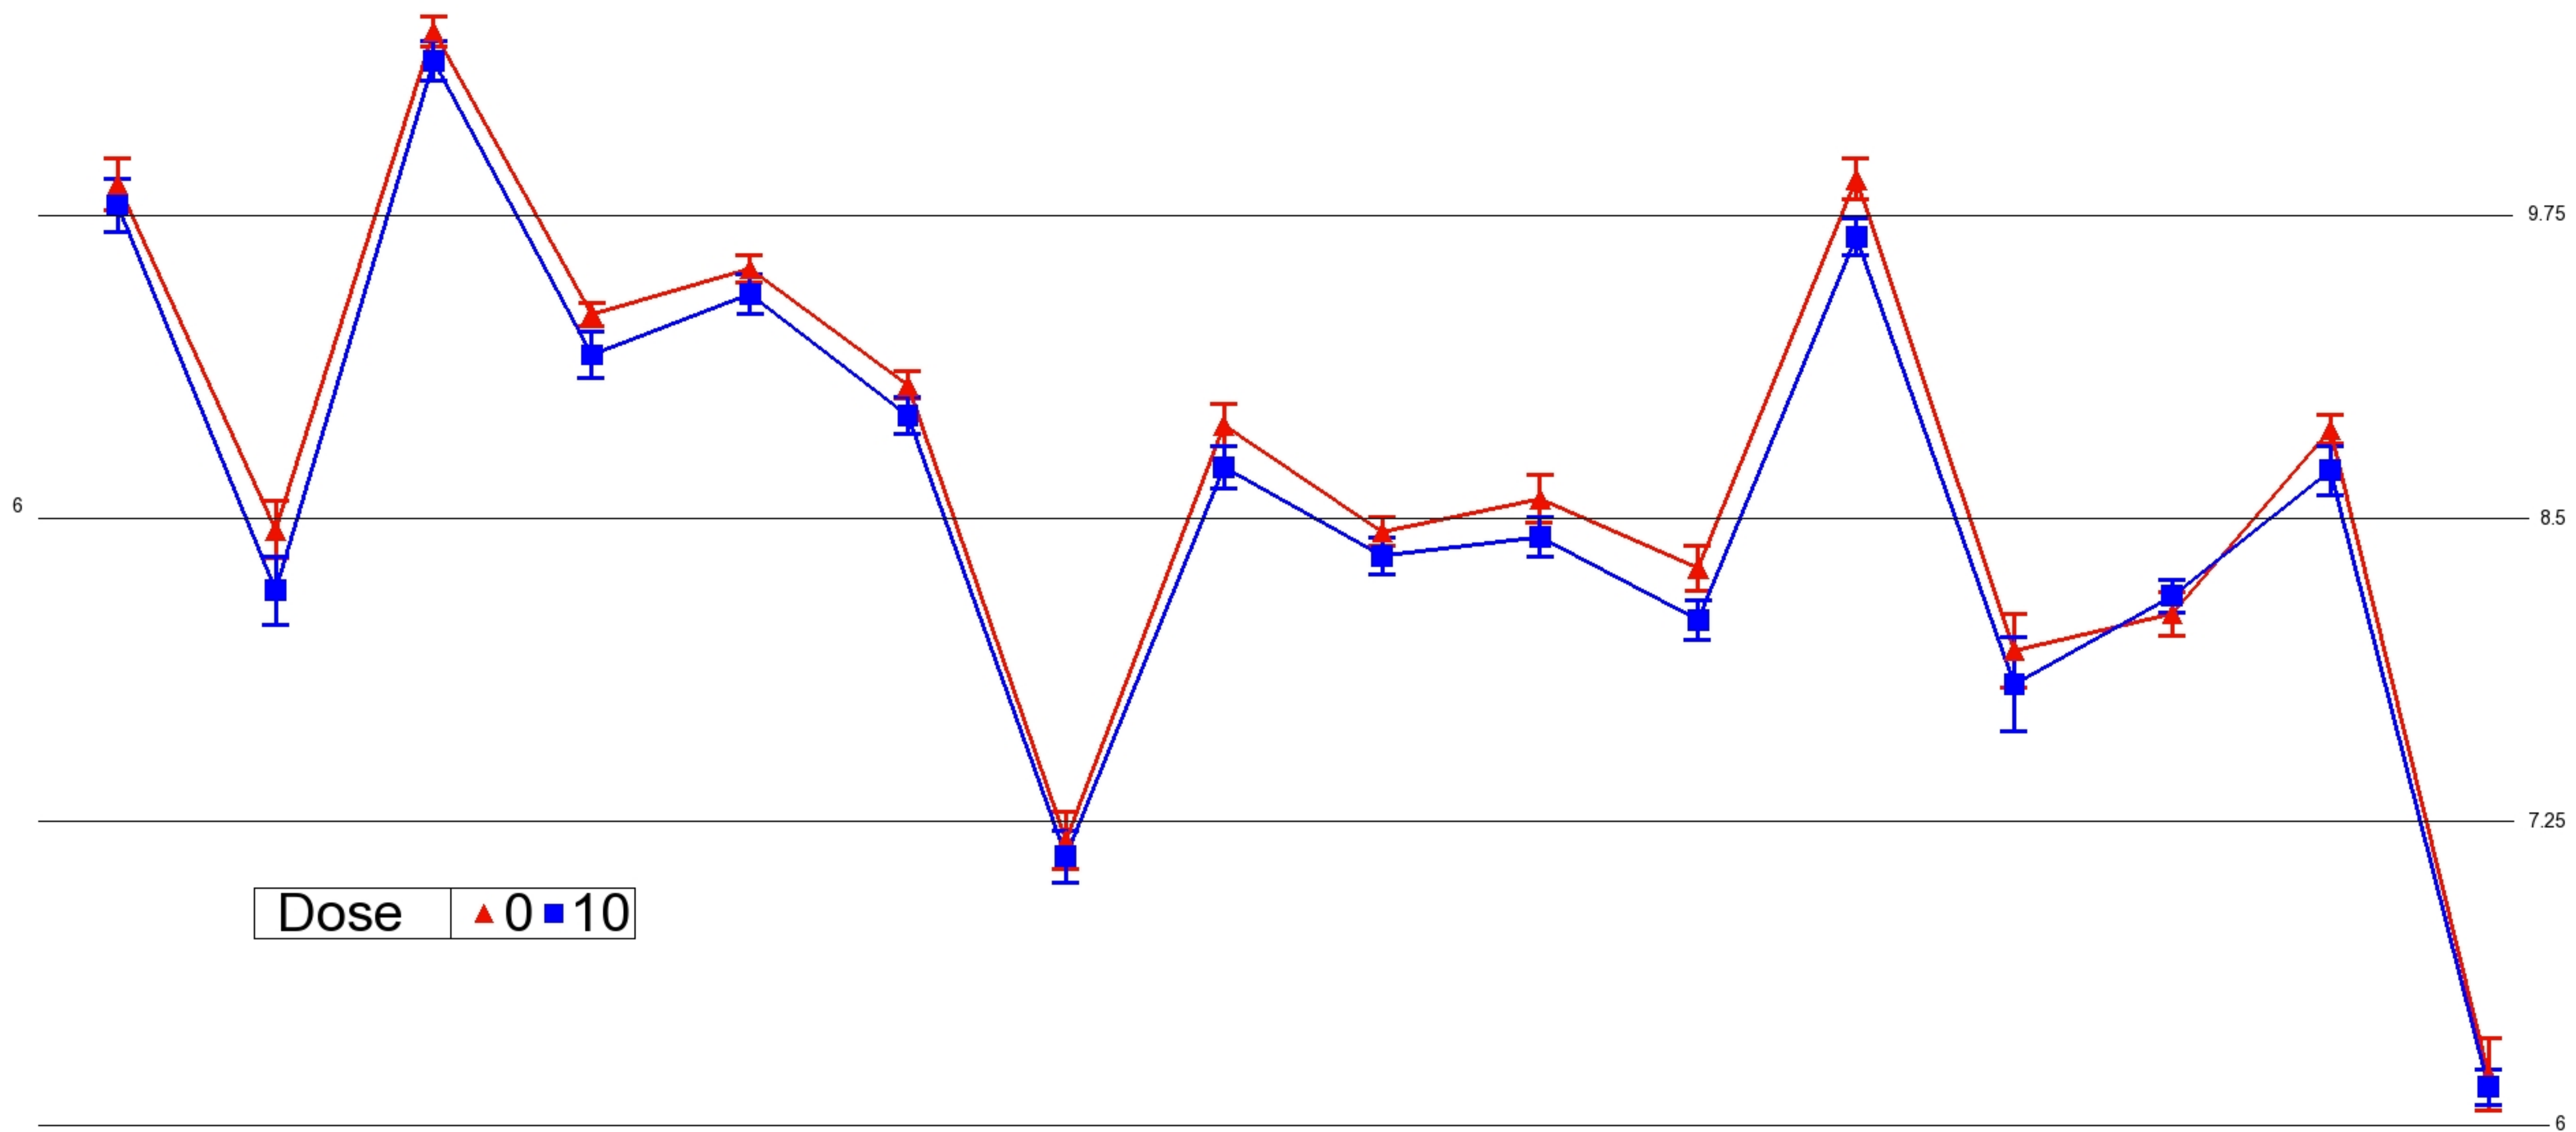

Dose    ▲ 0    ■ 10

2948565

2948566

2948567

2948568

2948569

2948570

2948571

2948574

2948575

2948577

2948578

2948579

2948581

2948582

2948583

2948584

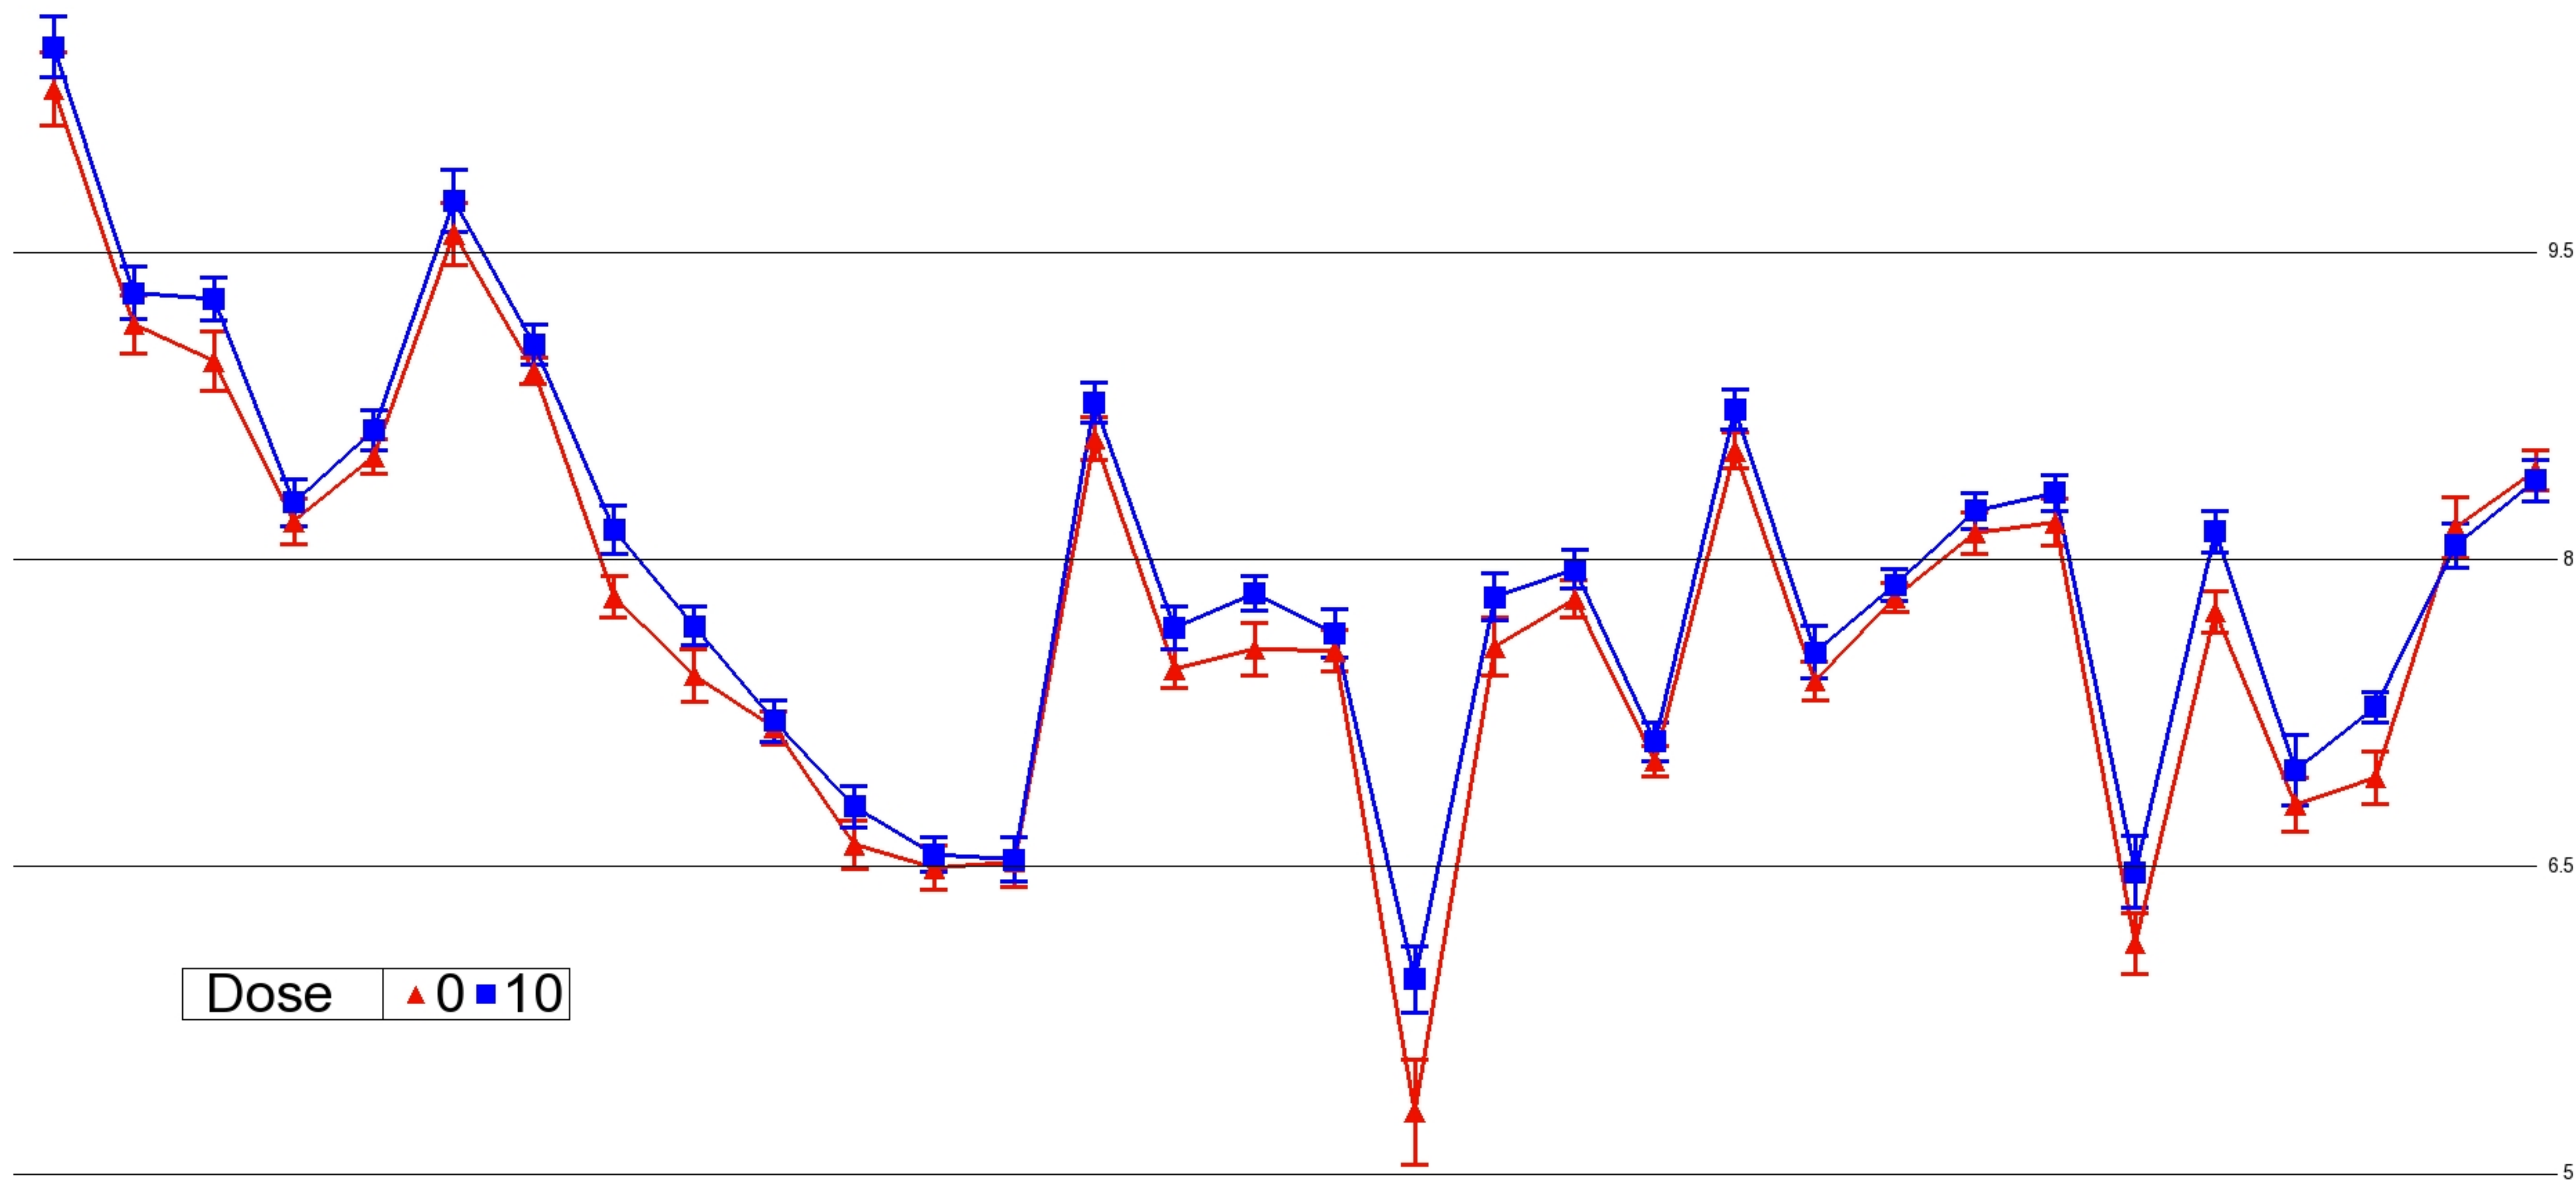

Dose    ▲ 0    ■ 10

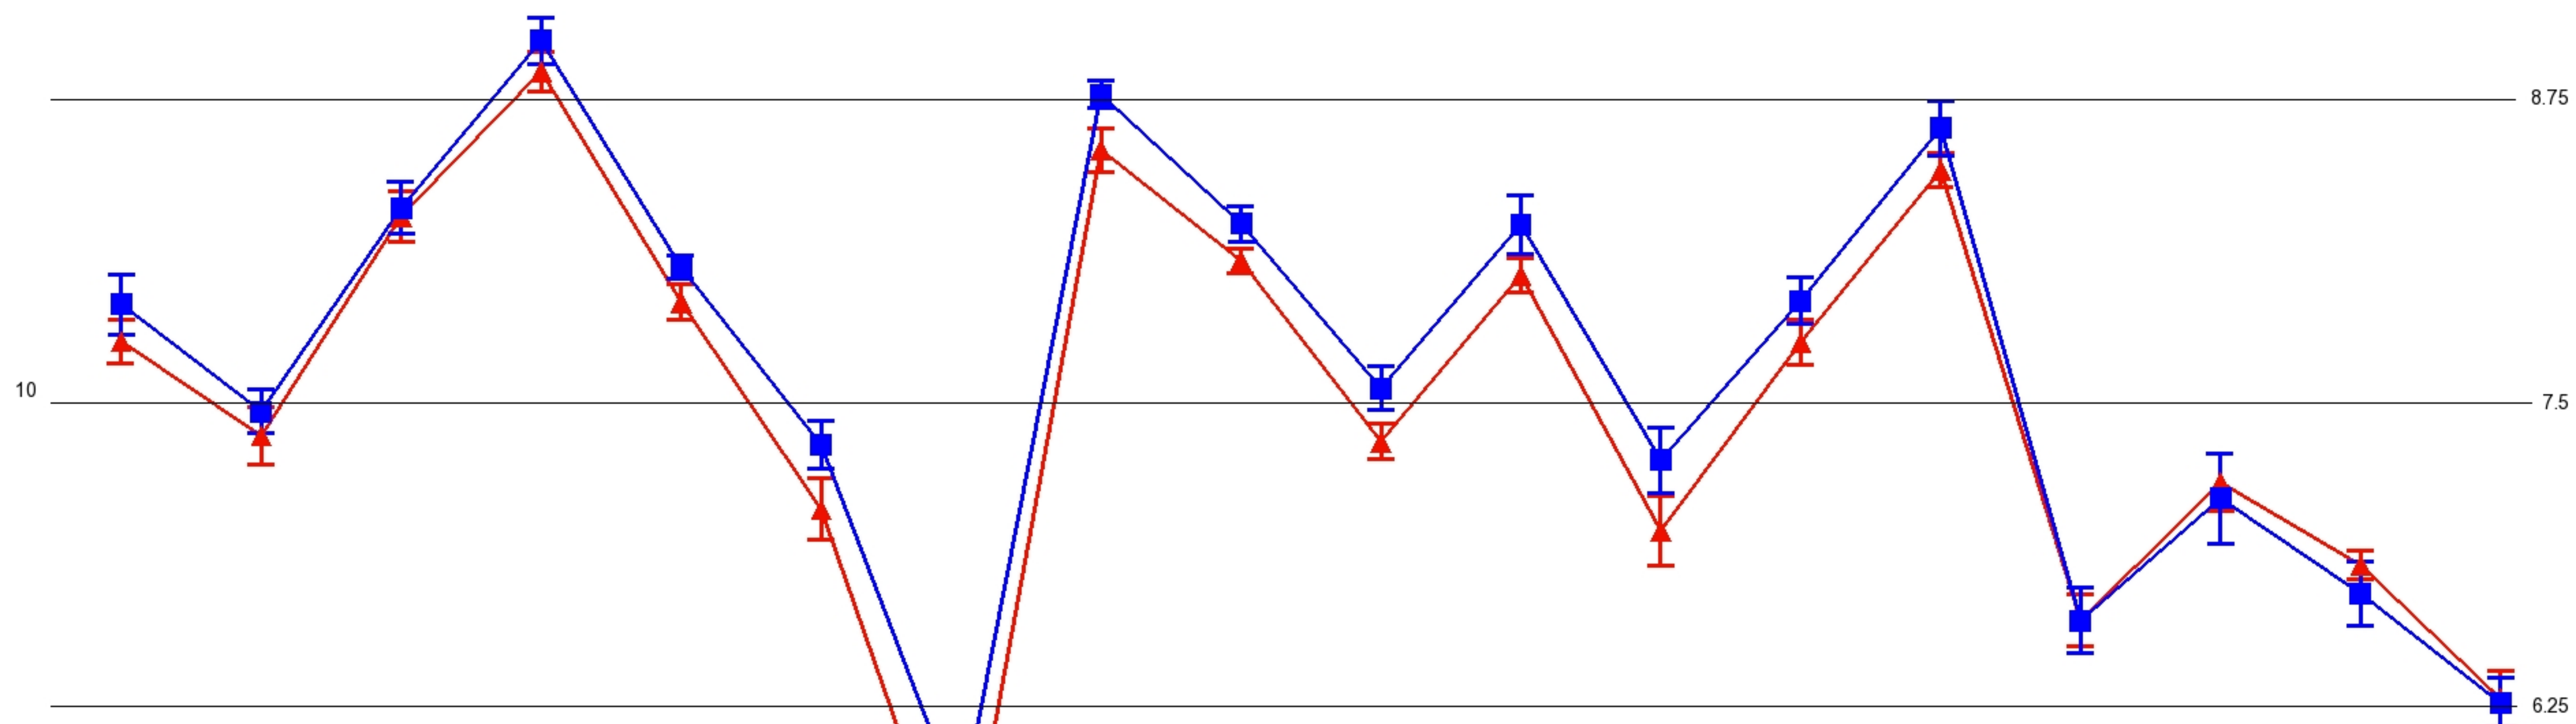

Dose

▲ 0

■ 10
