# Supplementary material for: DNA Repair Genes: Alternative Transcription and Gene Expression at the Exon Level in Response to the DNA Damaging Agent, Ionizing Radiation
Source: PubMed Central journal article supplement (PMC3532210; doi:10.1371/journal.pone.0053358), 2012-12-28
Supplement: pone.0053358.s002.pdf [file pone.0053358.s002.pdf]

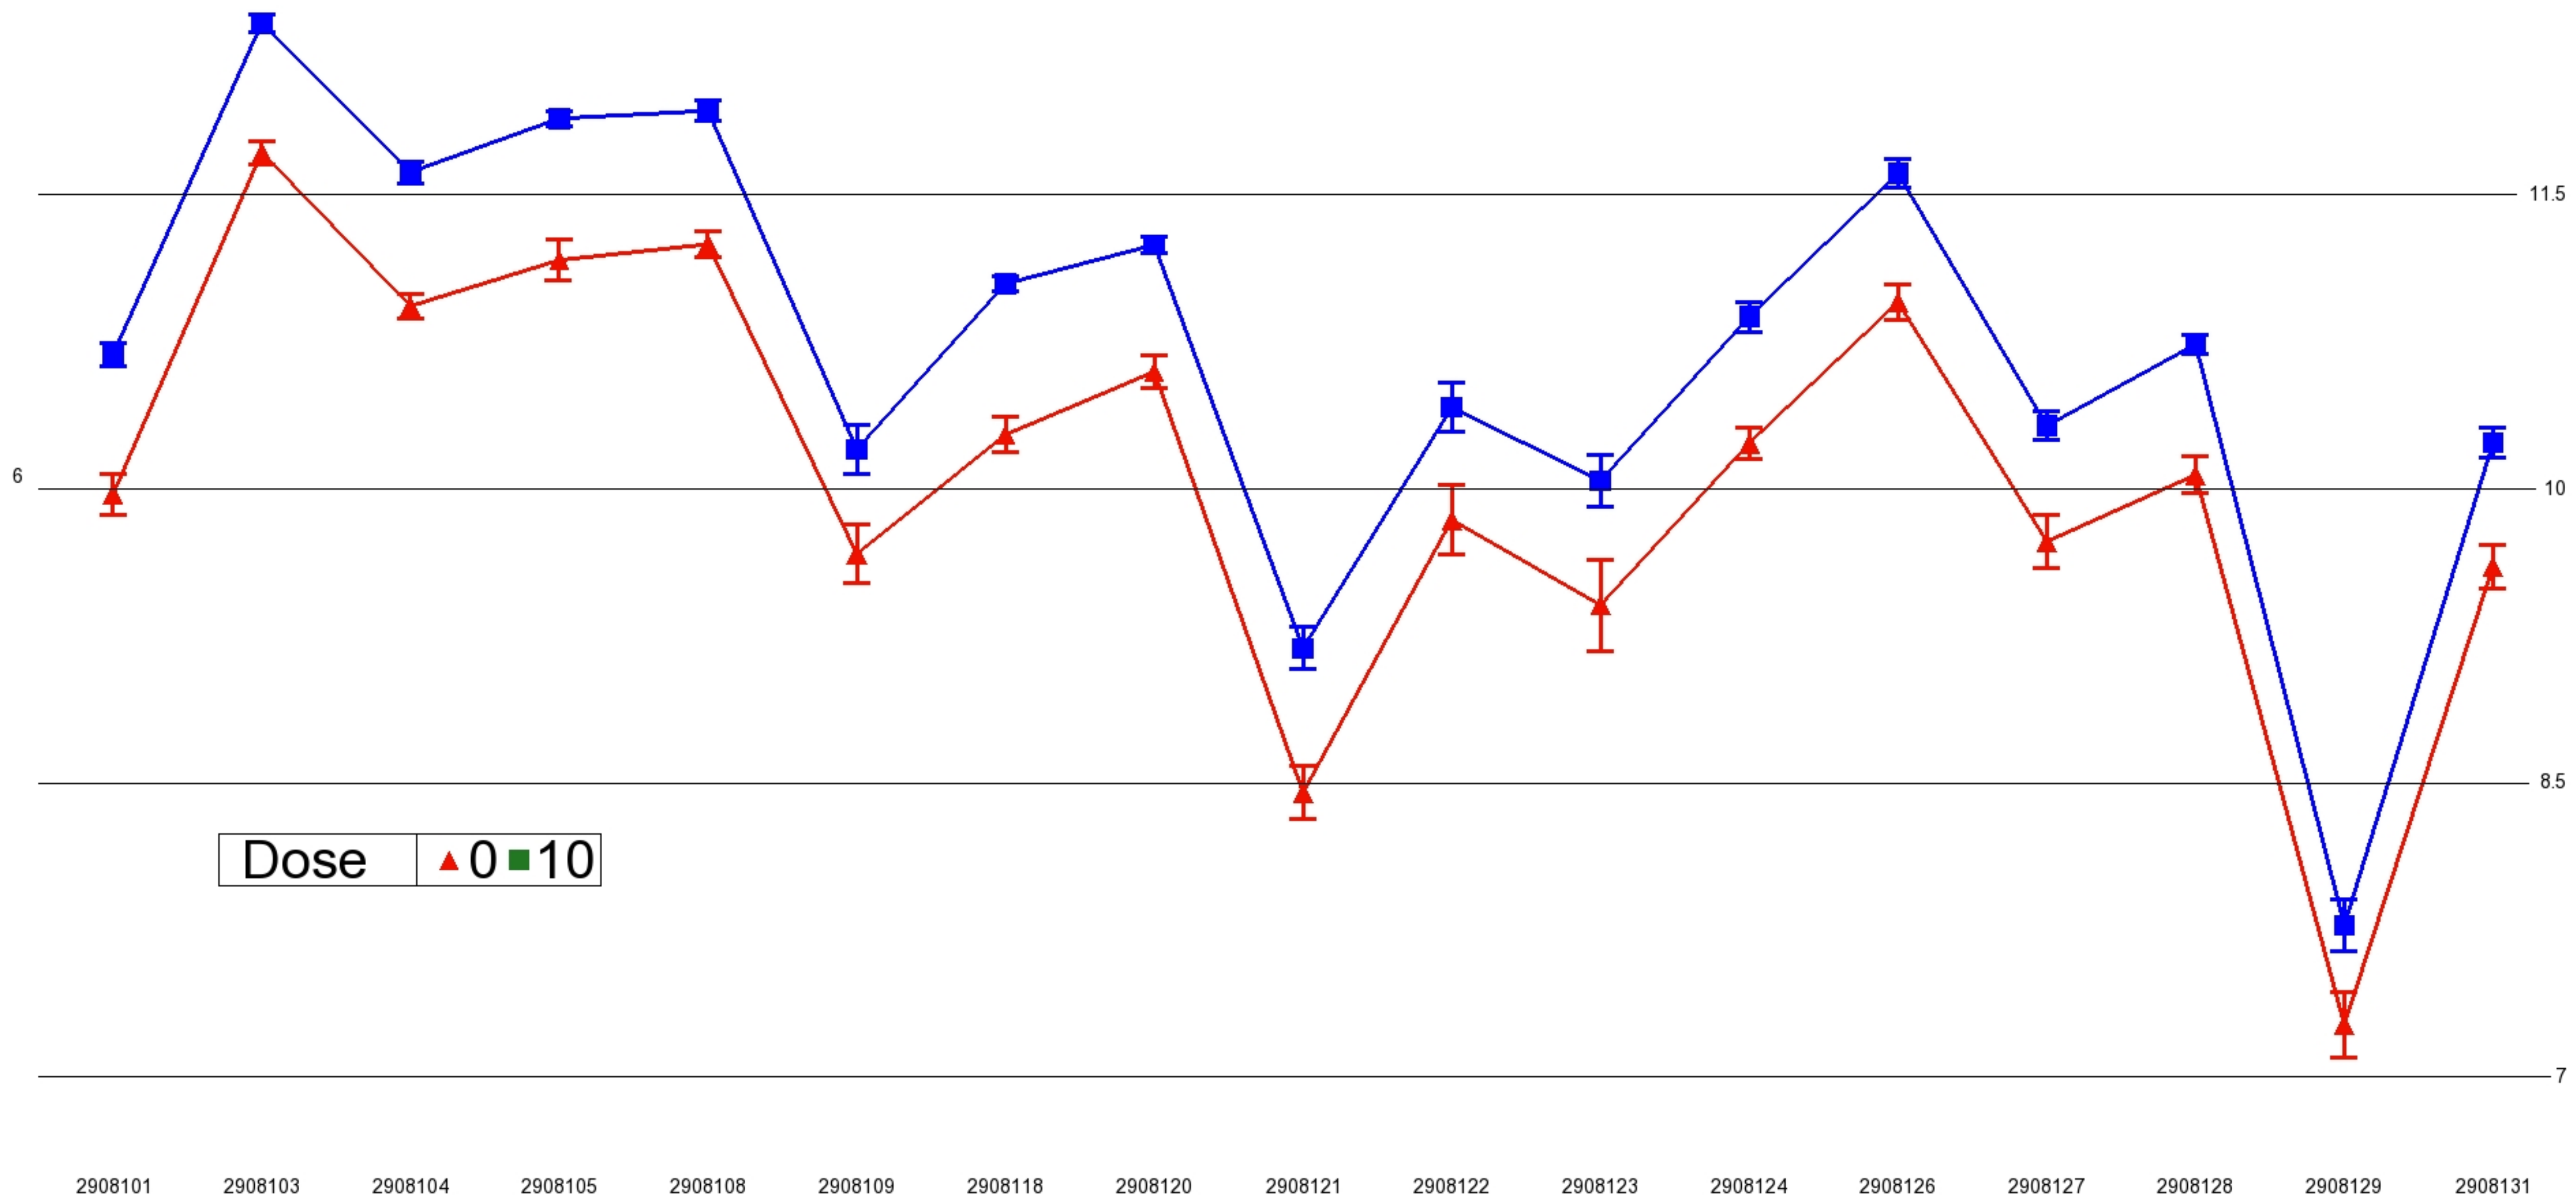

Dose    ▲ 0    ■ 10

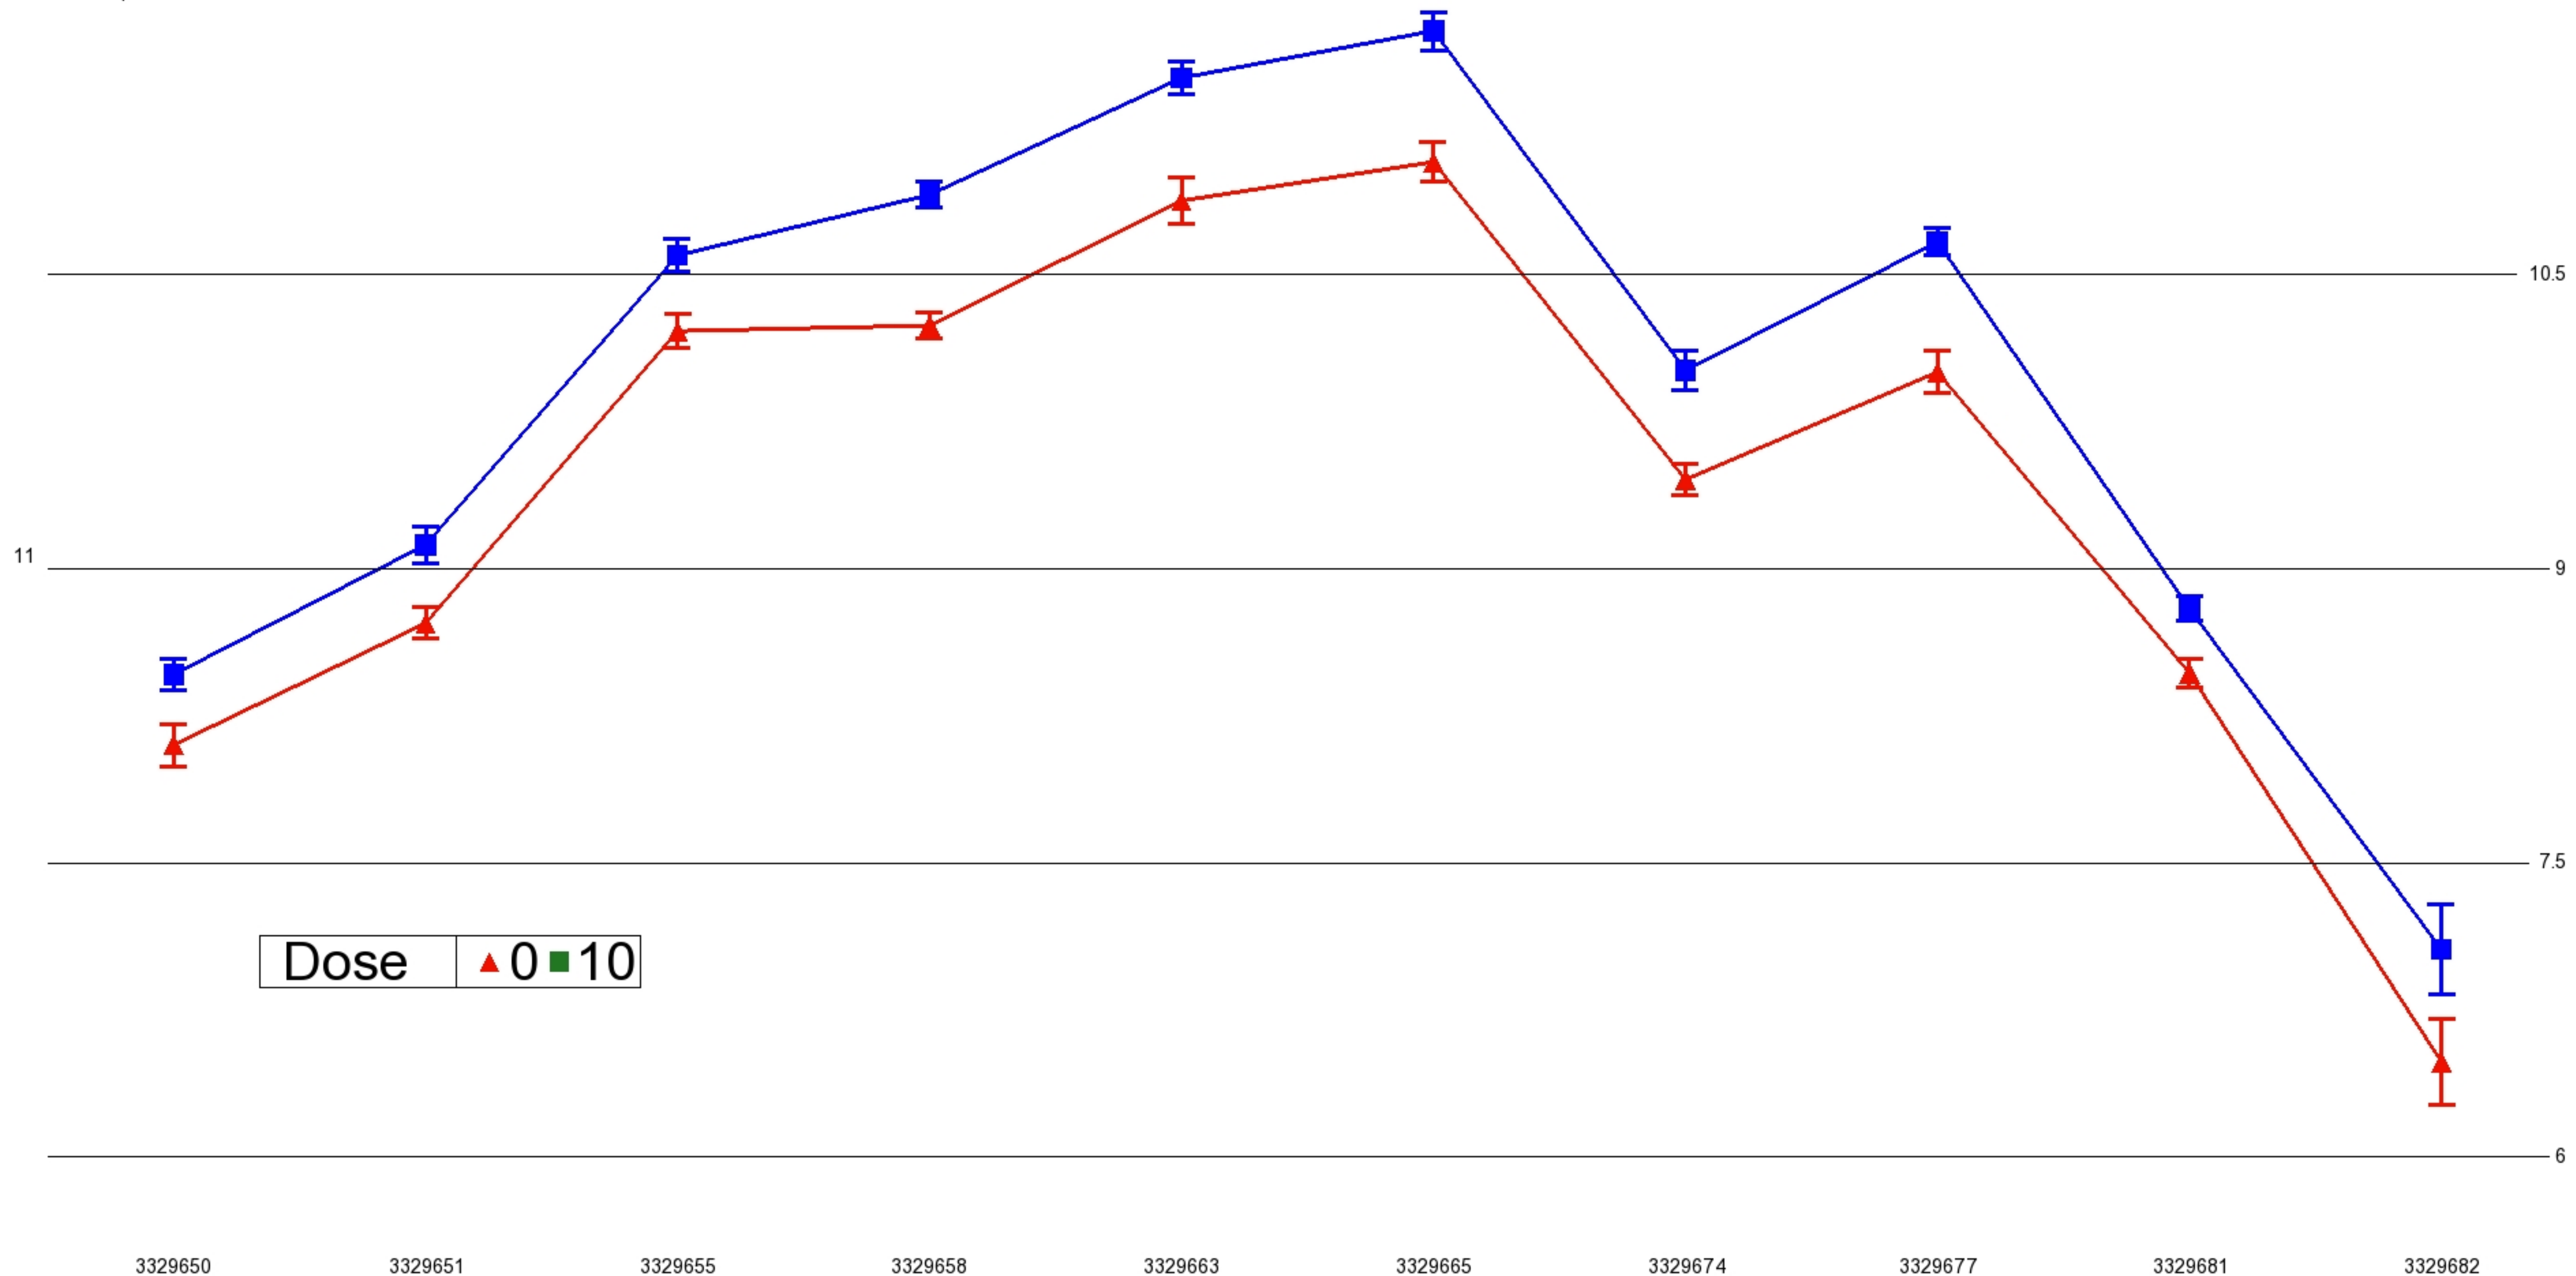

Dose

▲ 0

■ 10

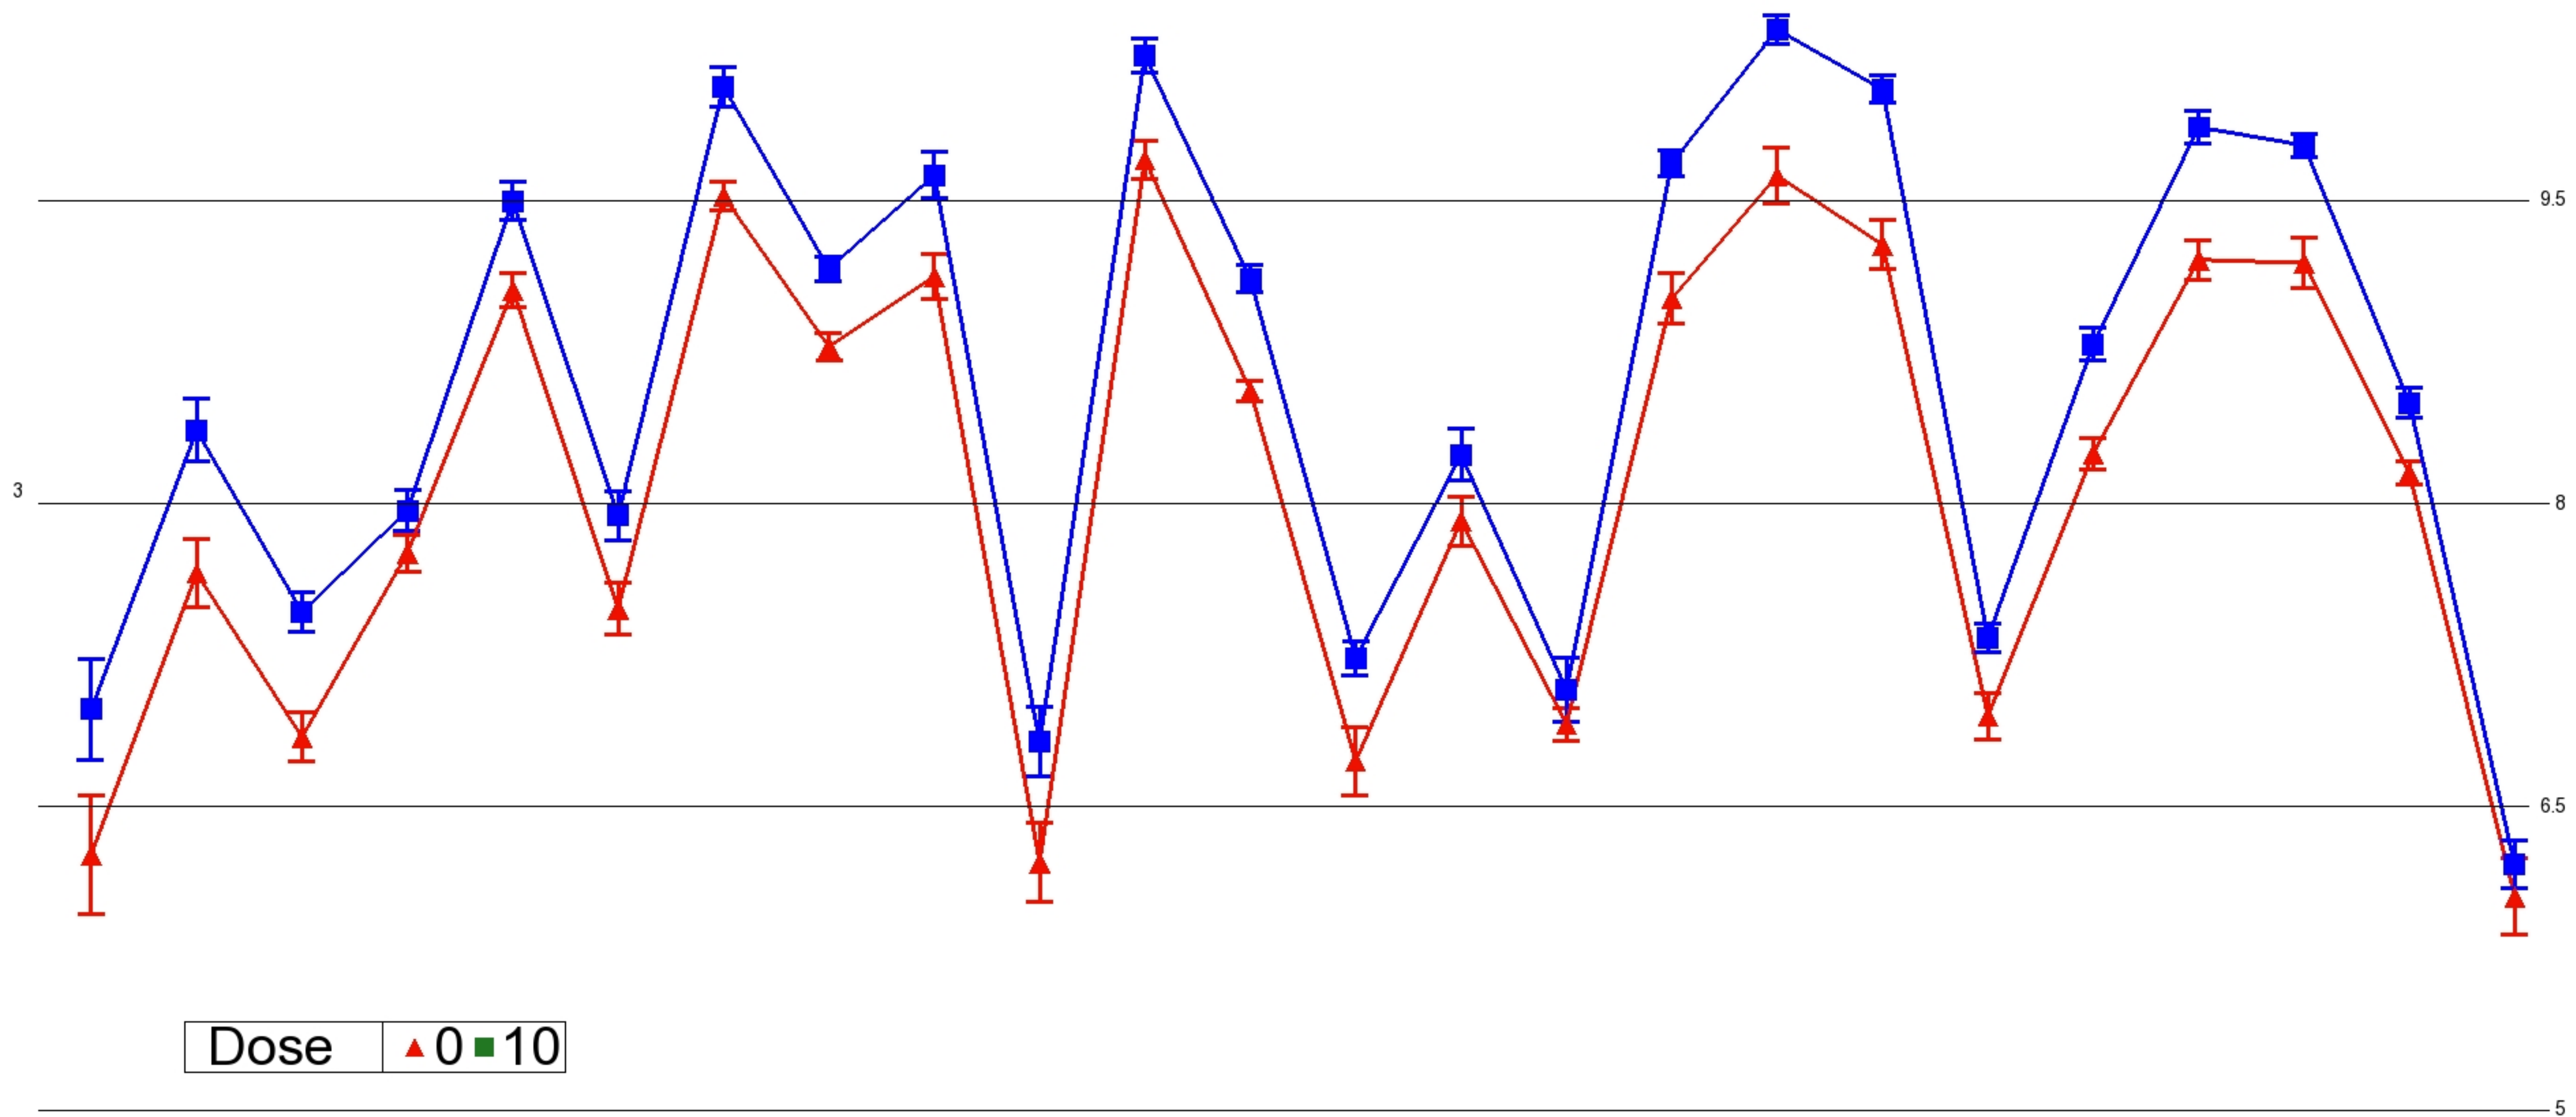

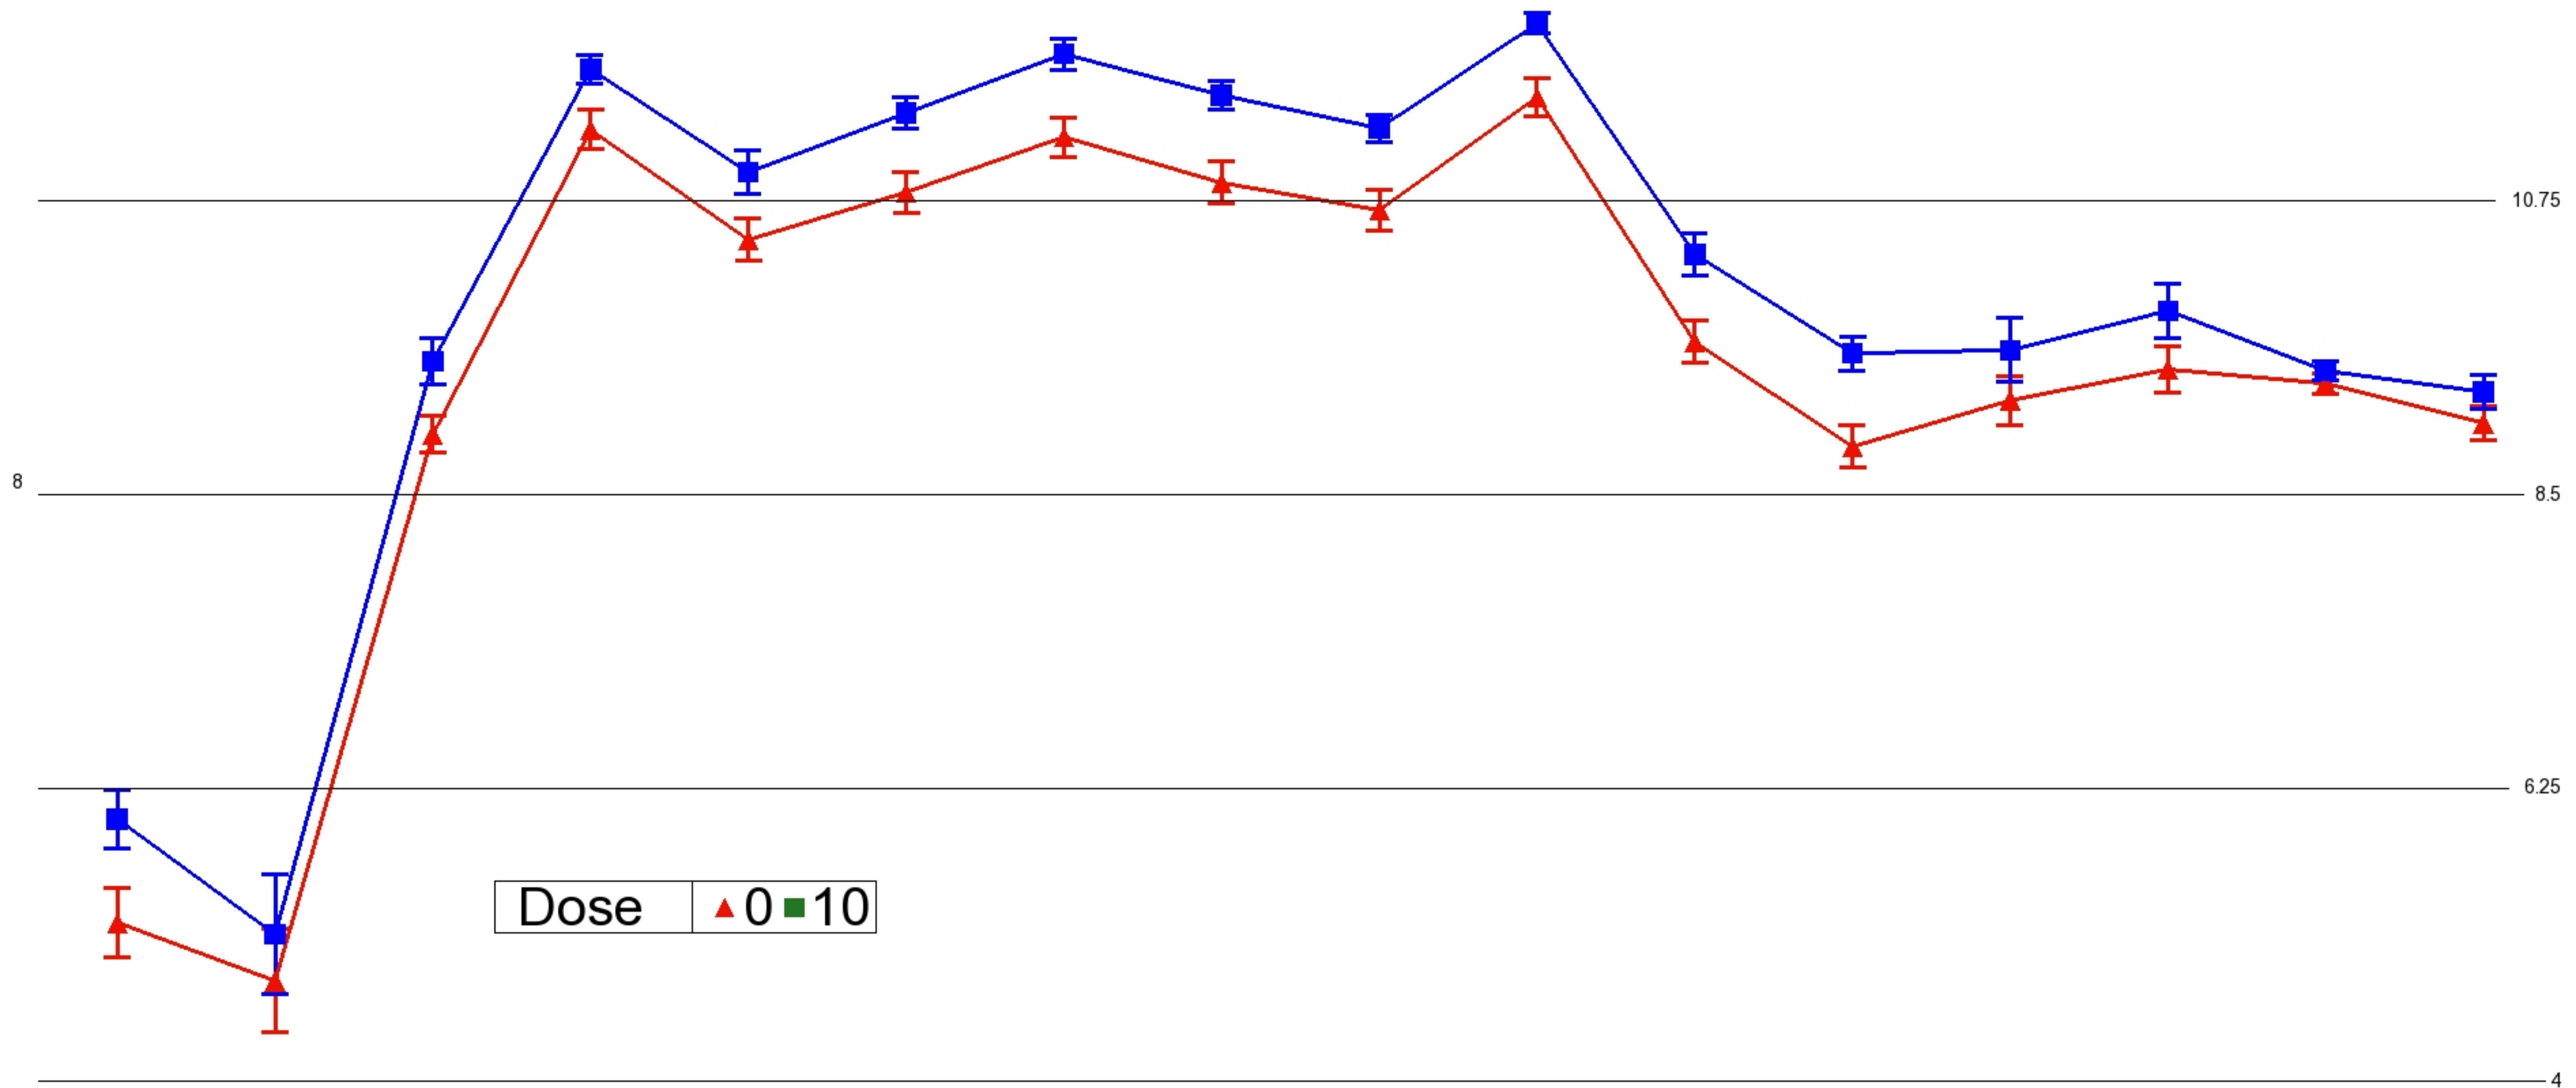

Dose ▲ 0 ■ 10

Exon Expression

DNA cross-link repair 1C ( DCLRE1C )

13

Dose ▲ 0 ■ 10

10

9

7

5

3278980 3278991 3278992 3278994 3278995 3278997 3279000 3279003 3279004 3279005 3279006 3279009 3279015 3279016 3279018 3279025 3279026

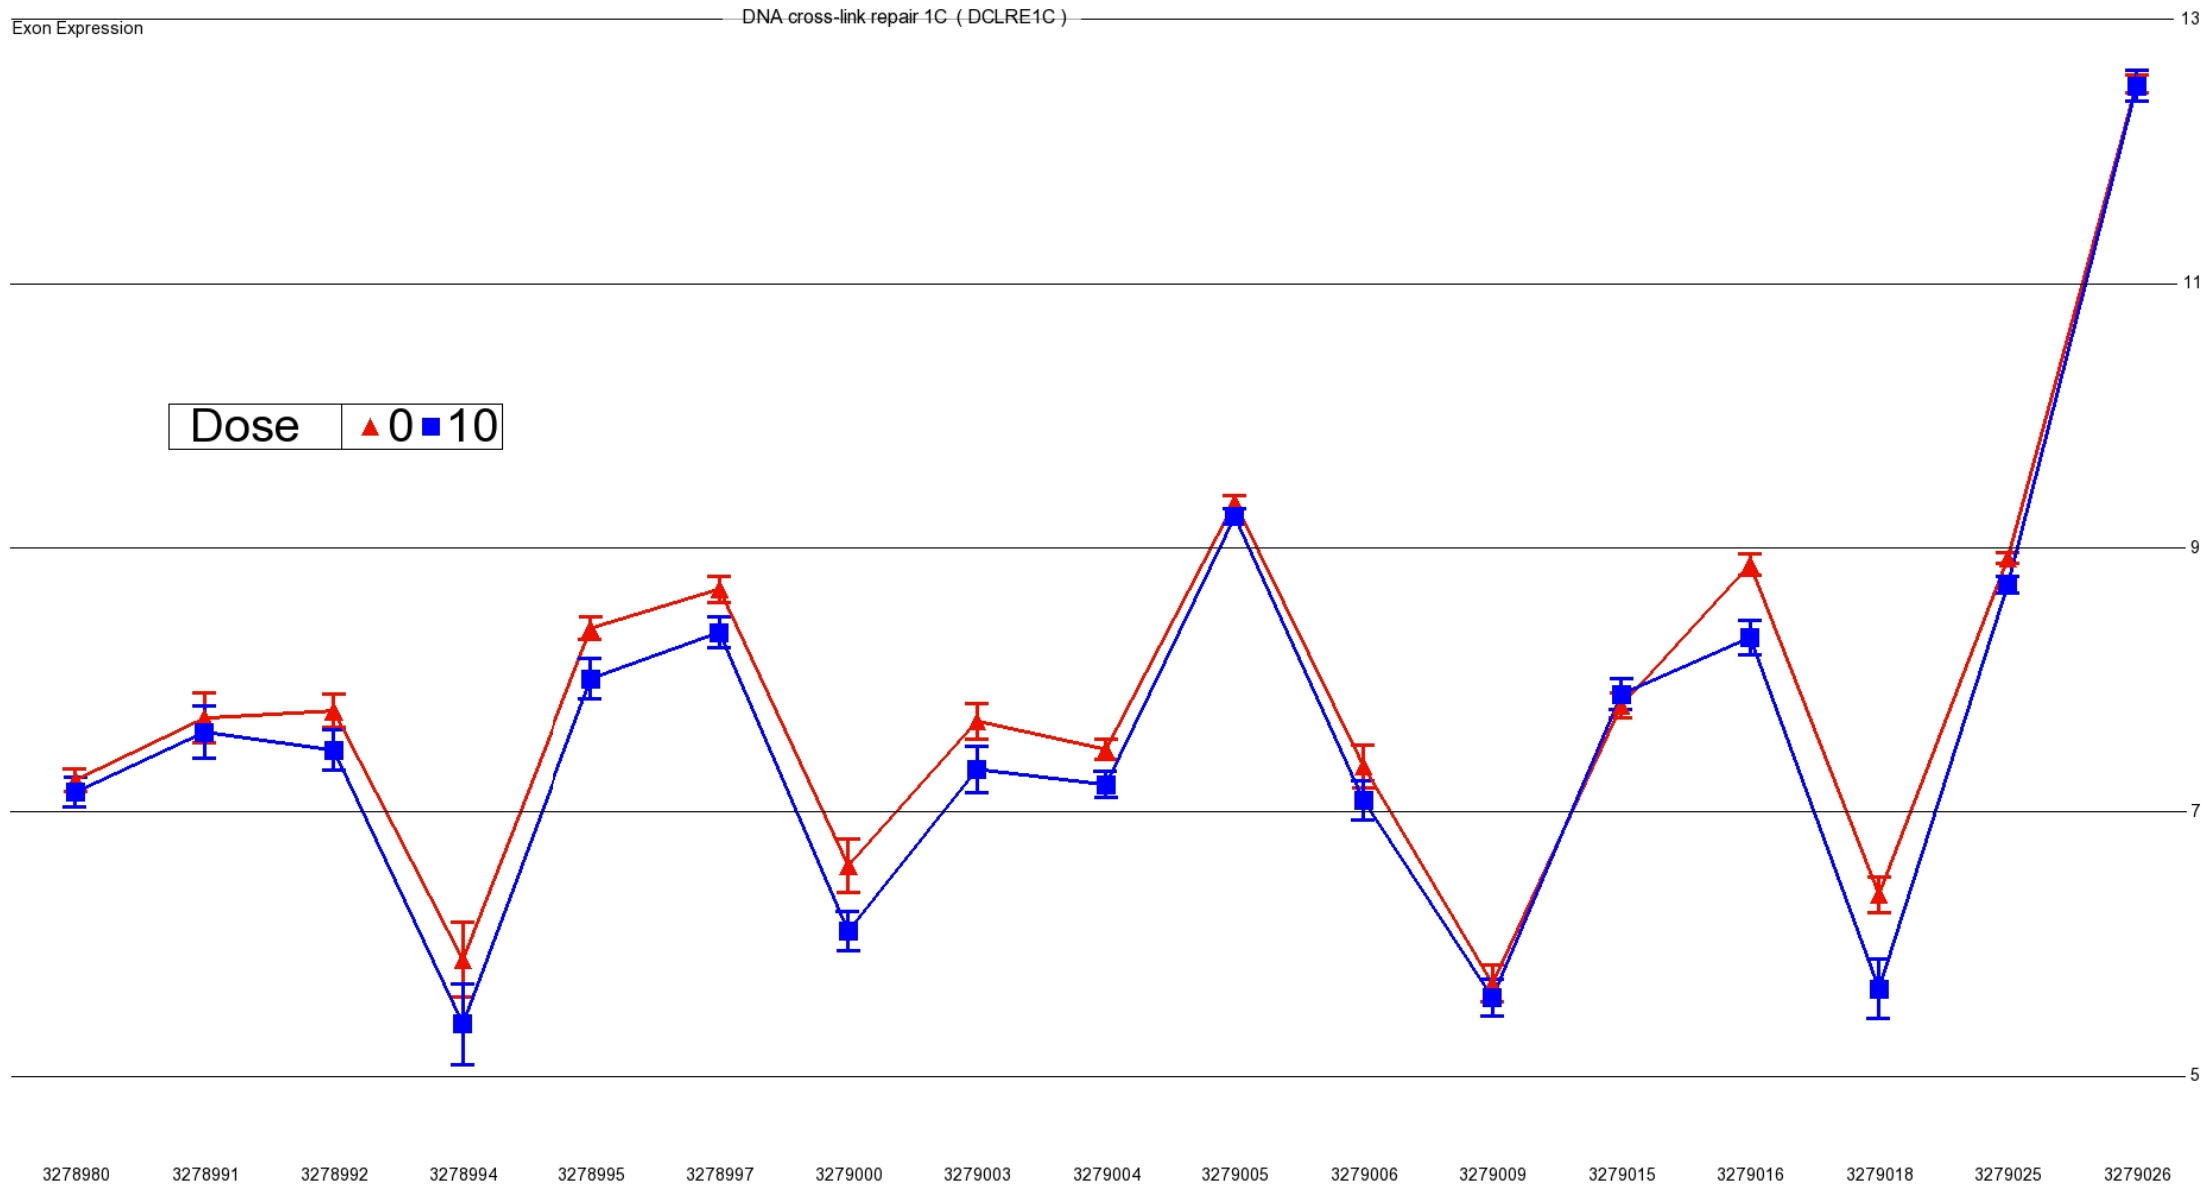

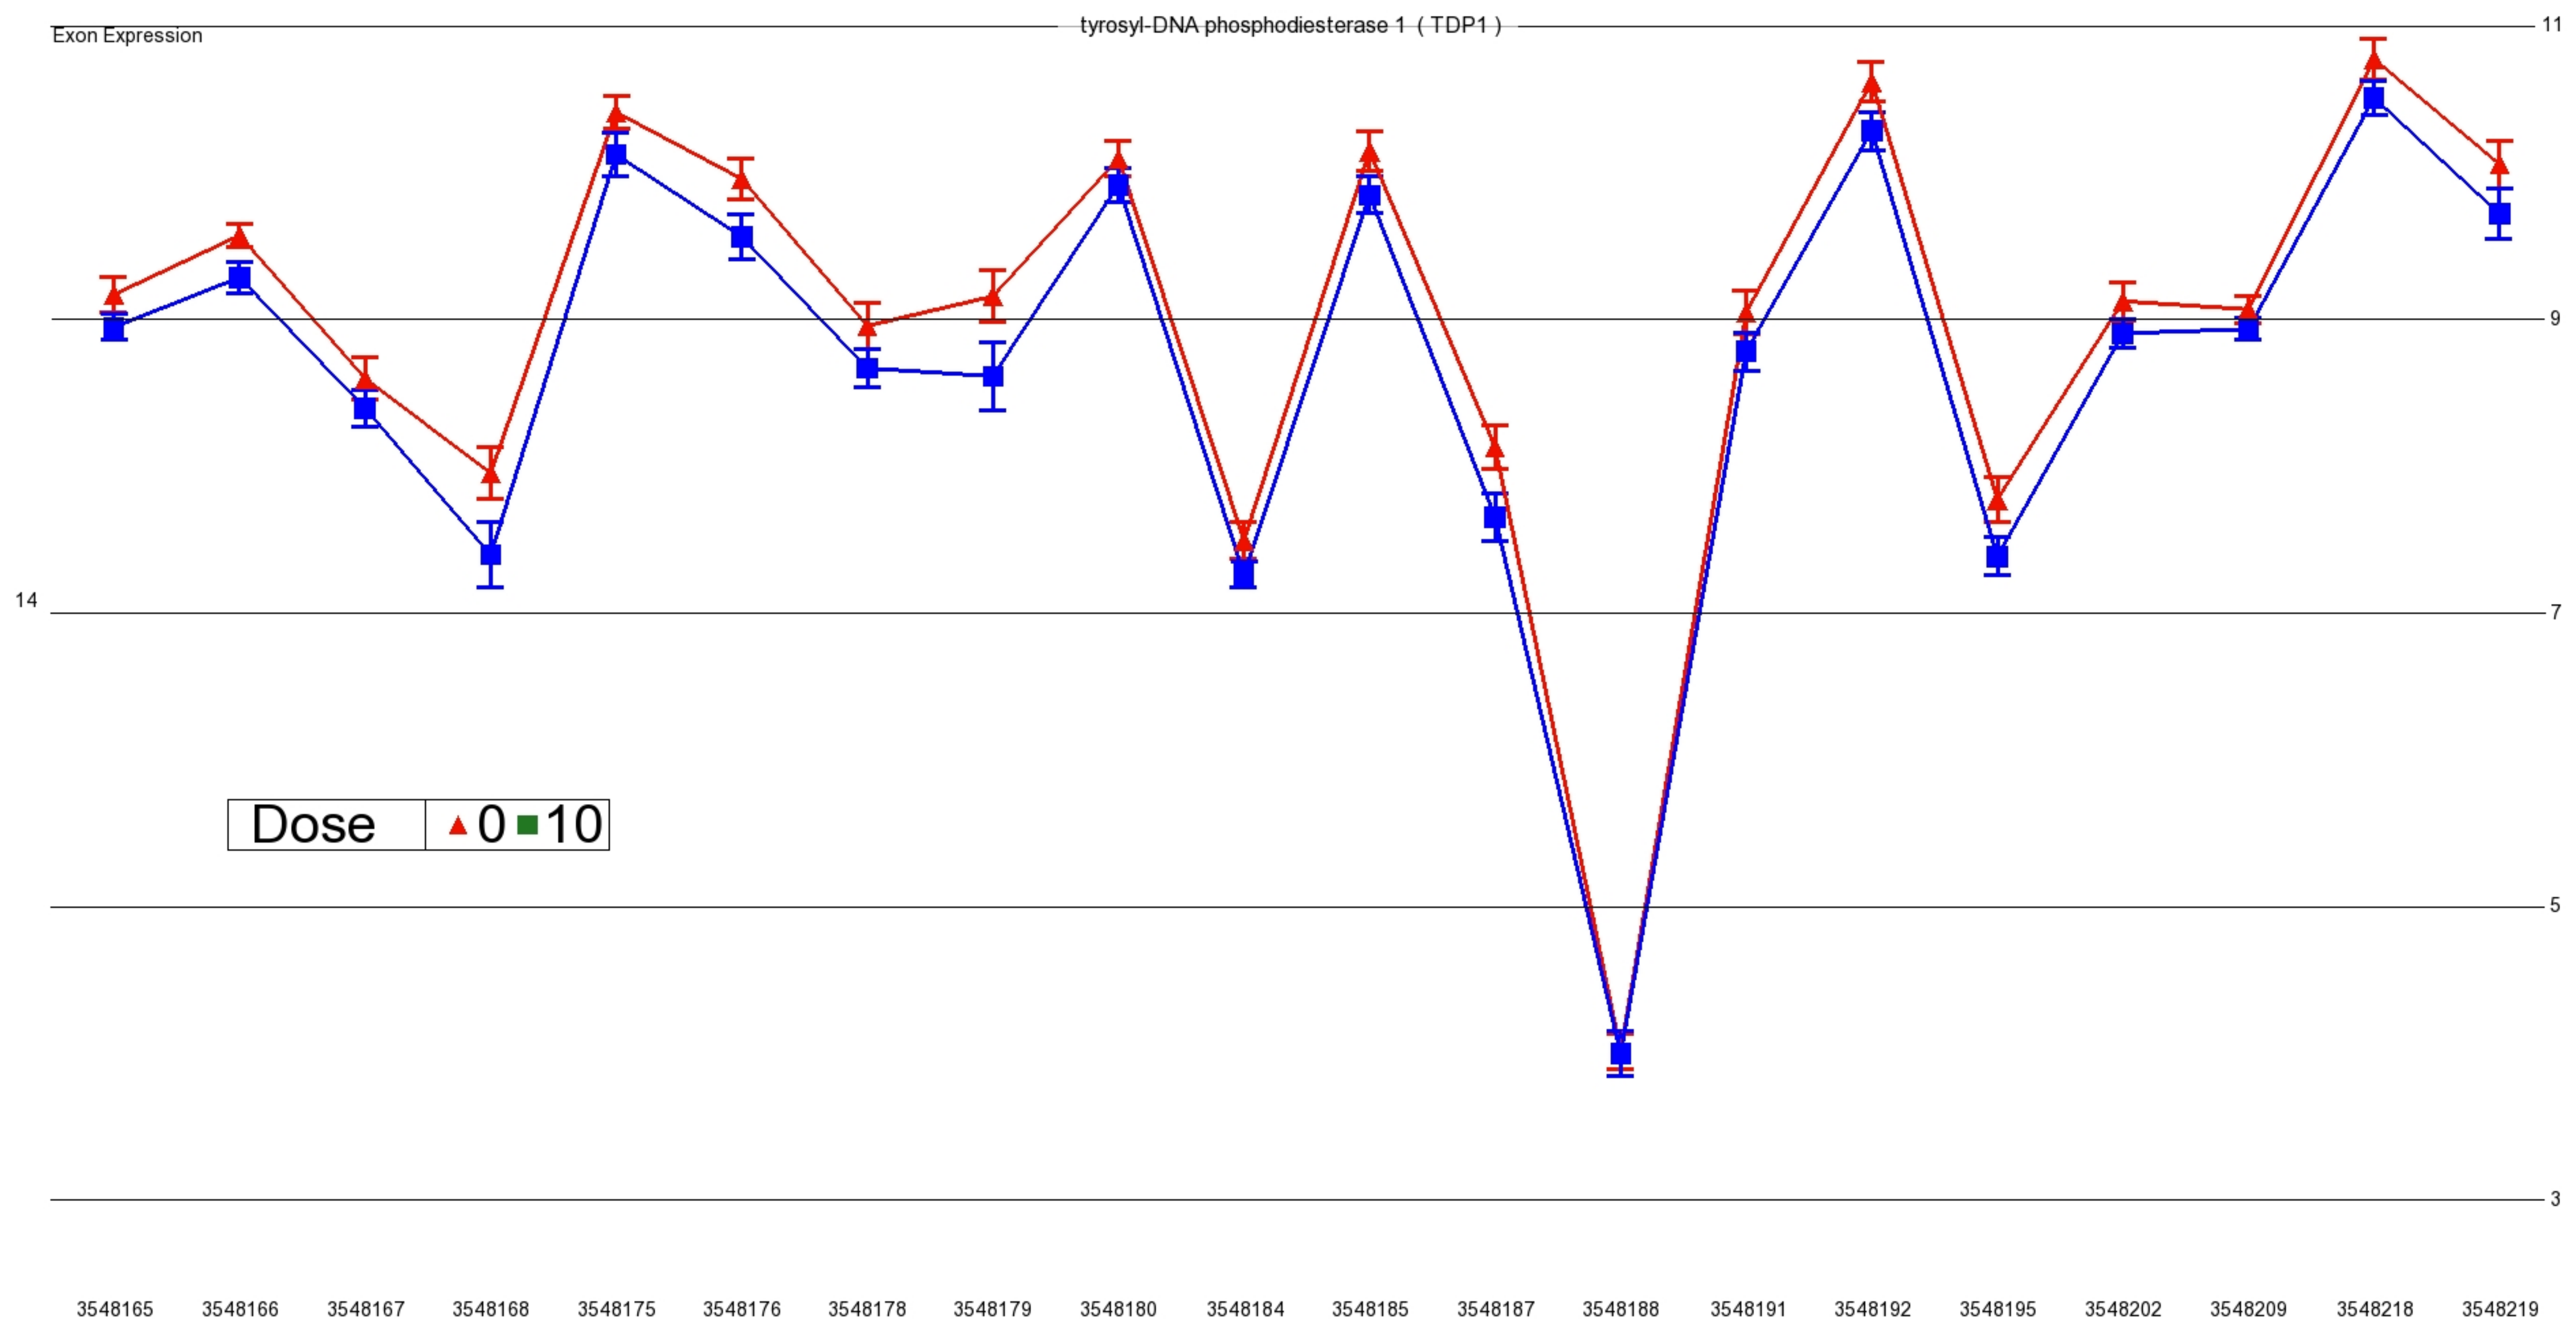

10

6

4.5

3

3307683

3307684

Dose

3307686

▲ 0 ■ 10

3307687

3307688

3307691

3307692

3307693

3307694

3307695

3307696

3307697

3307698

3307699

3307700

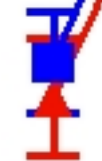

■

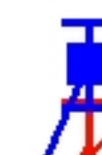

■

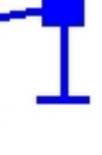

■

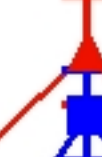

■

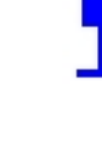

■

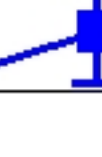

■

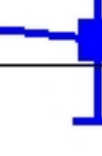

■

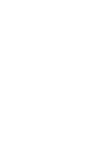

■



■

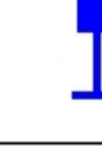

■



■



■

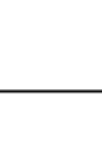

■



■

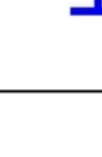

■

▲

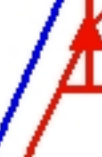

▲



▲



▲

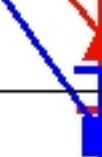

▲

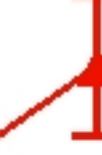

▲

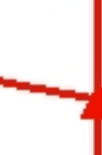

▲

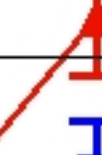

▲

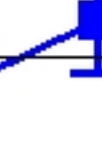

▲

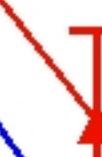

▲

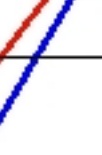

▲

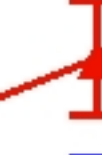

▲

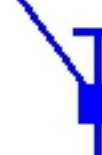

▲

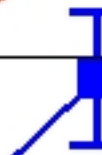

▲

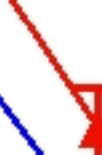

▲

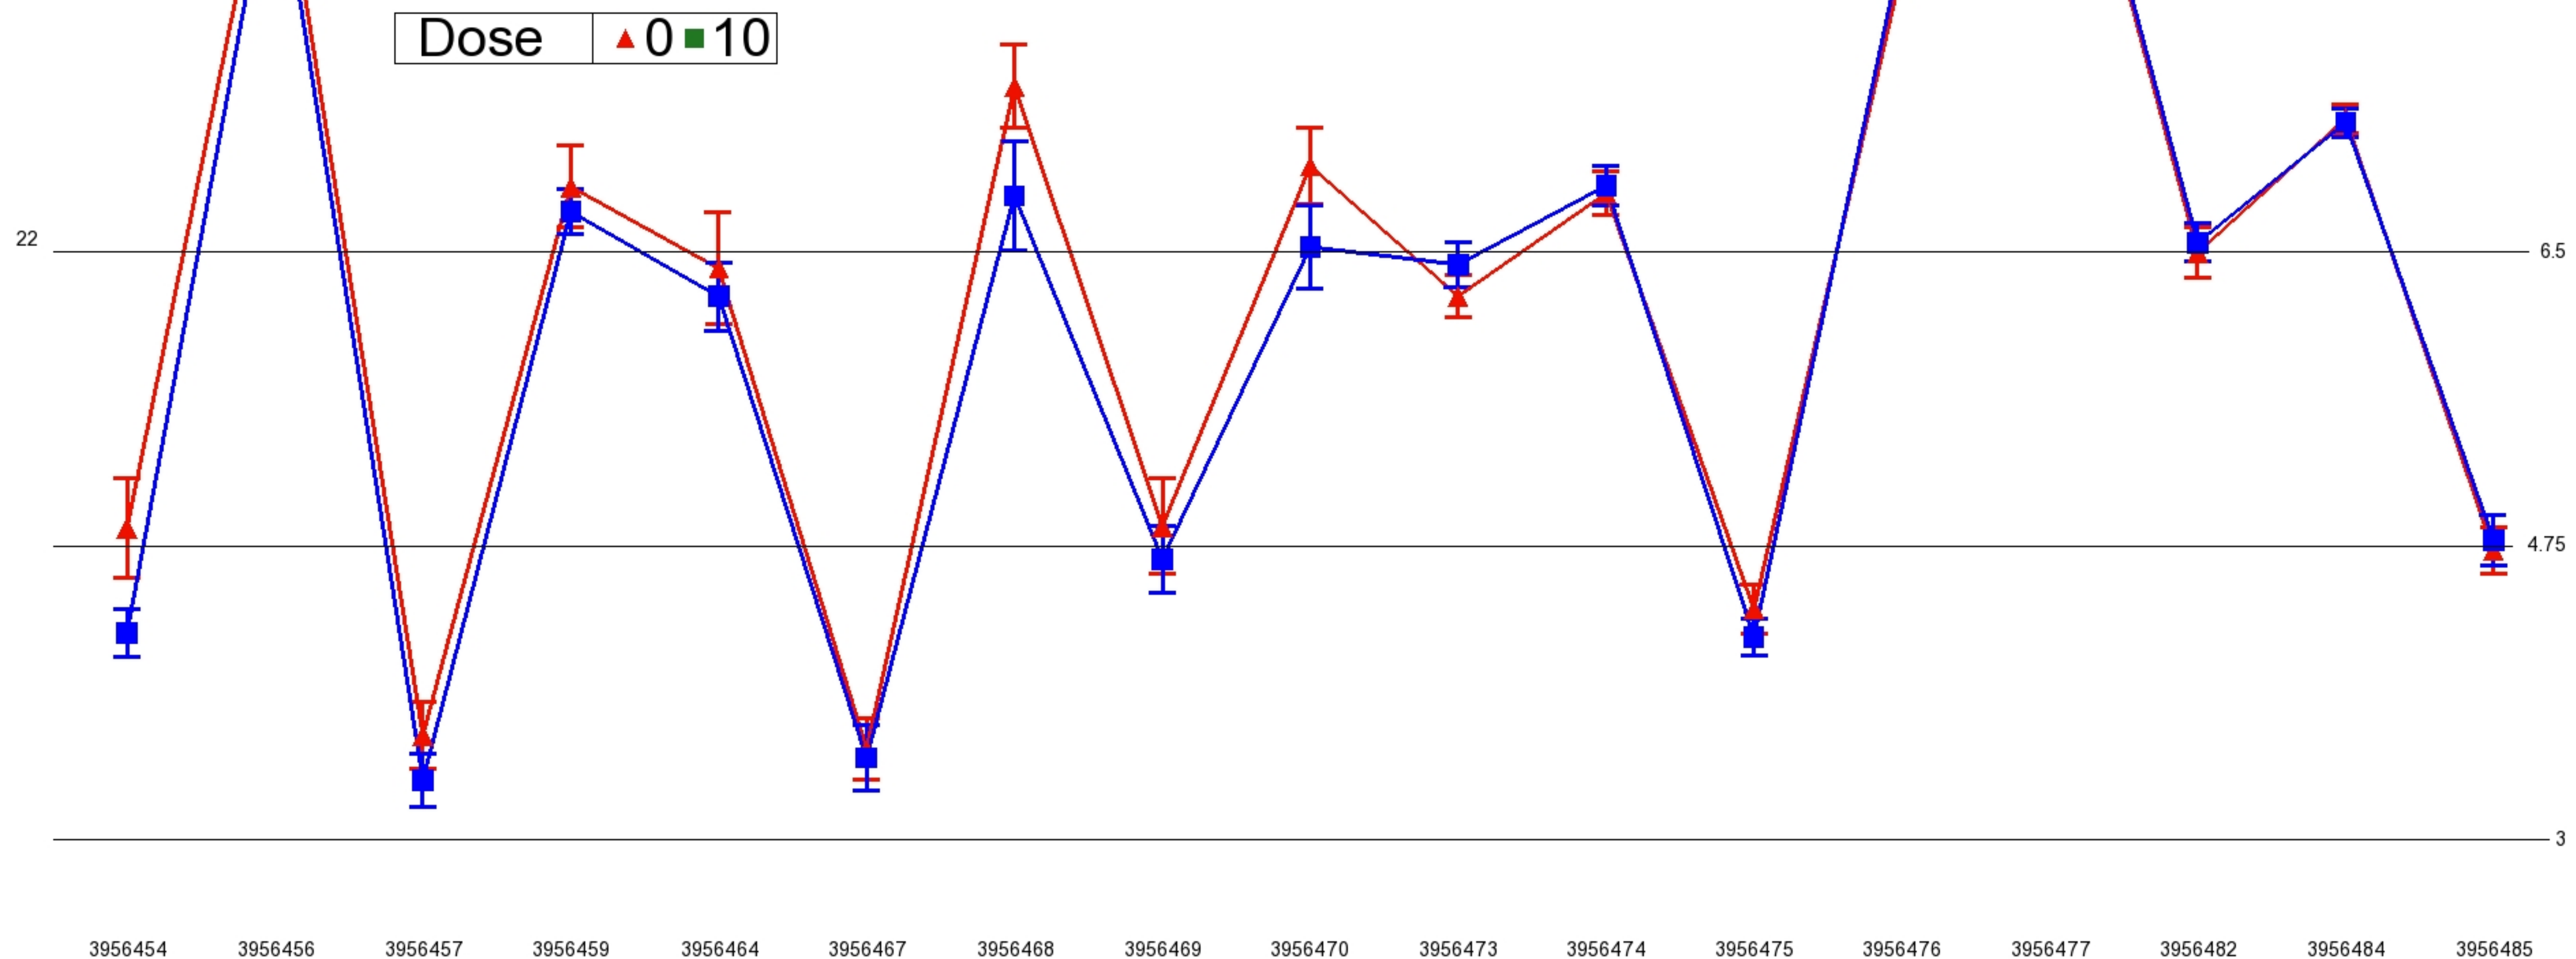



12

9

8

7

3470692

3470696

3470697

3470698

3470701

Dose ▲ 0 ■ 10

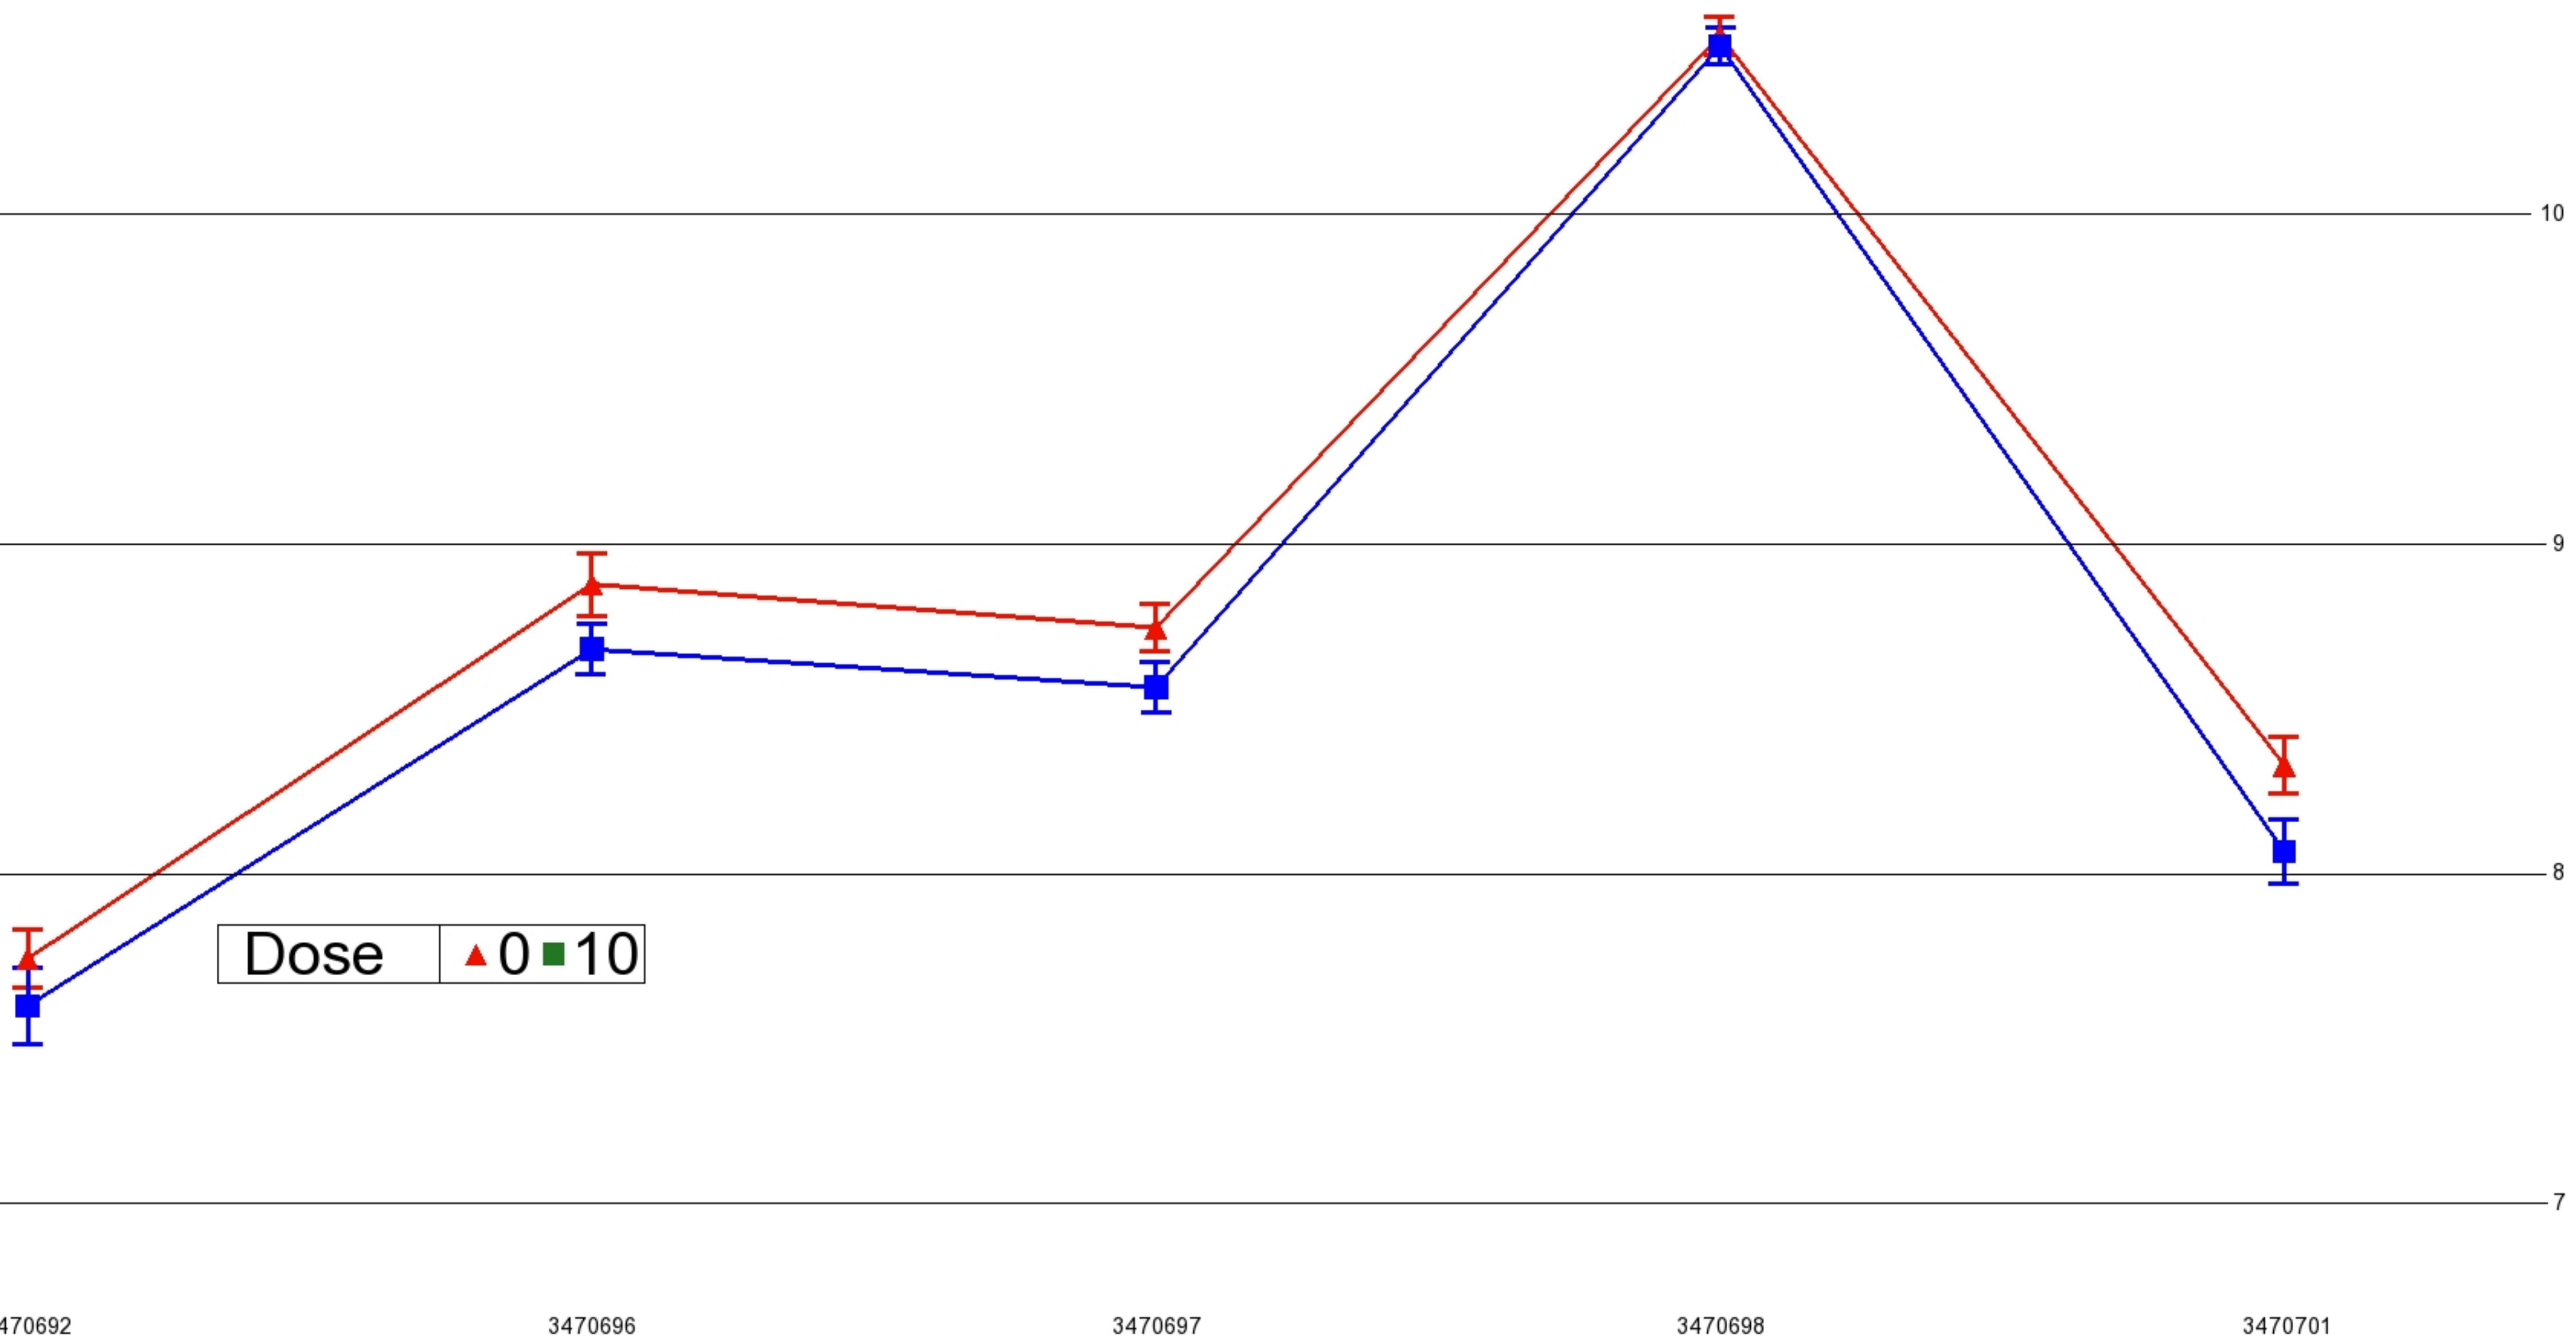

Exon Expression

proliferating cell nuclear antigen ( PCNA )

13

11.25

9.5

7.75

6

Dose ▲ 0 ■ 10

3896204

3896211

3896213

3896214

3896216

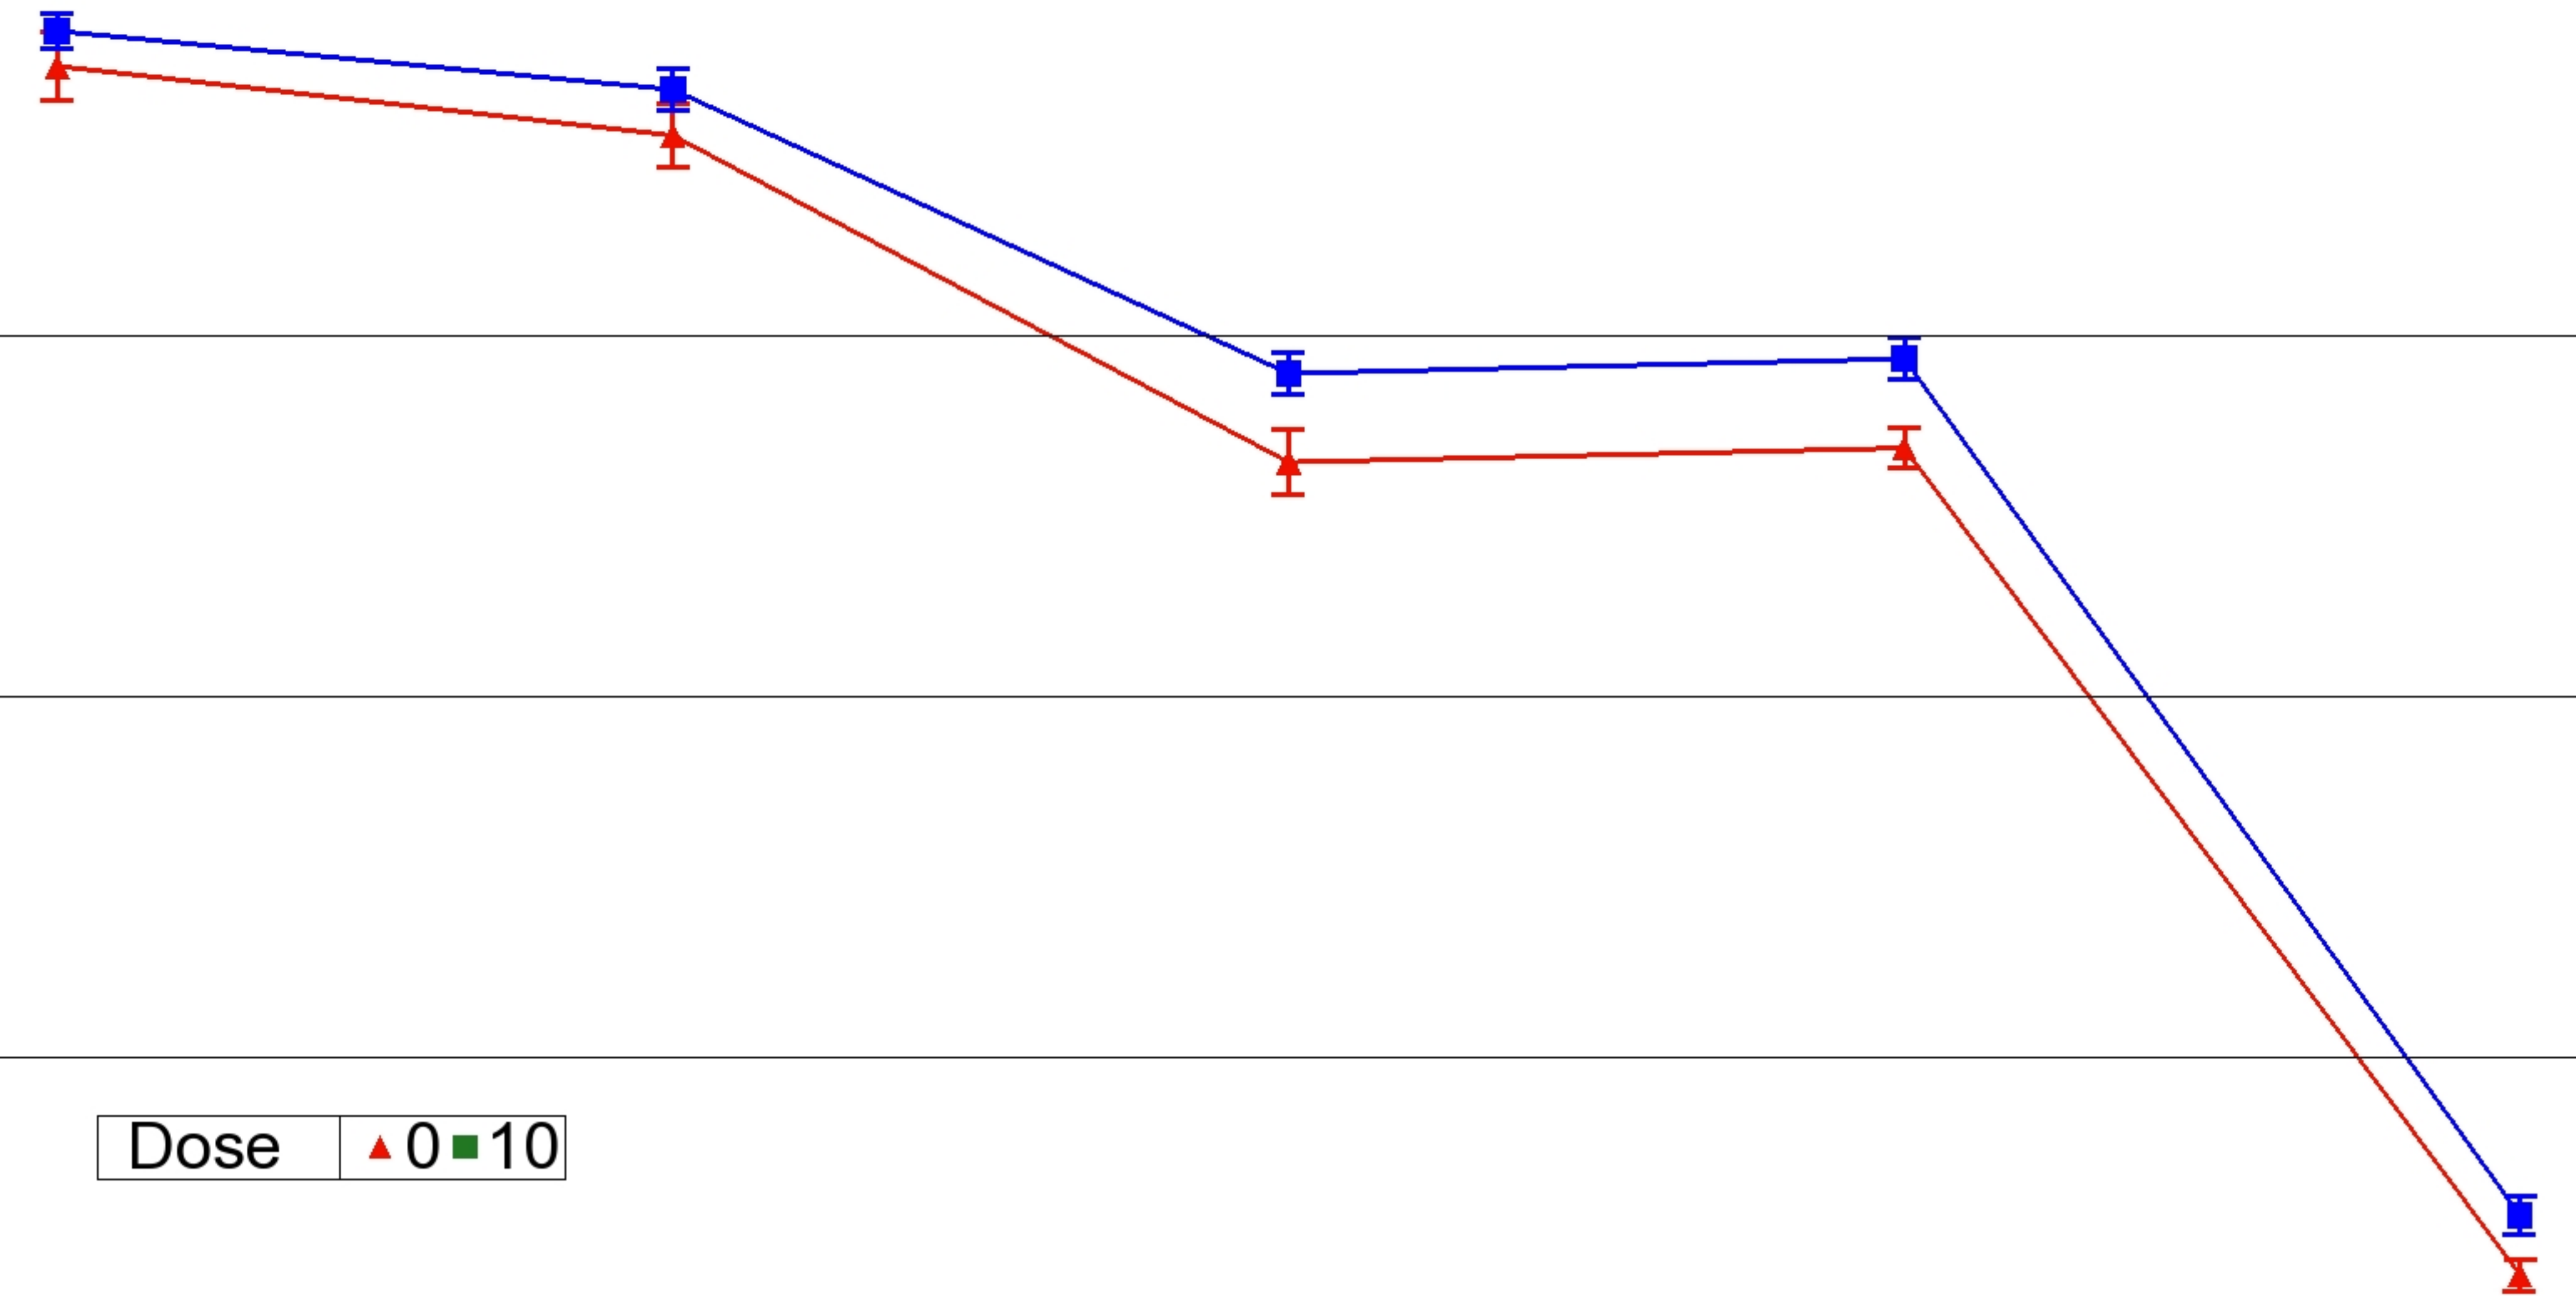

15

Dose ▲ 0 ■ 10

7.25

8.5

9.75

6

3593154 3593155 3593157 3593158 3593161 3593168 3593170 3593171 3593172 3593173

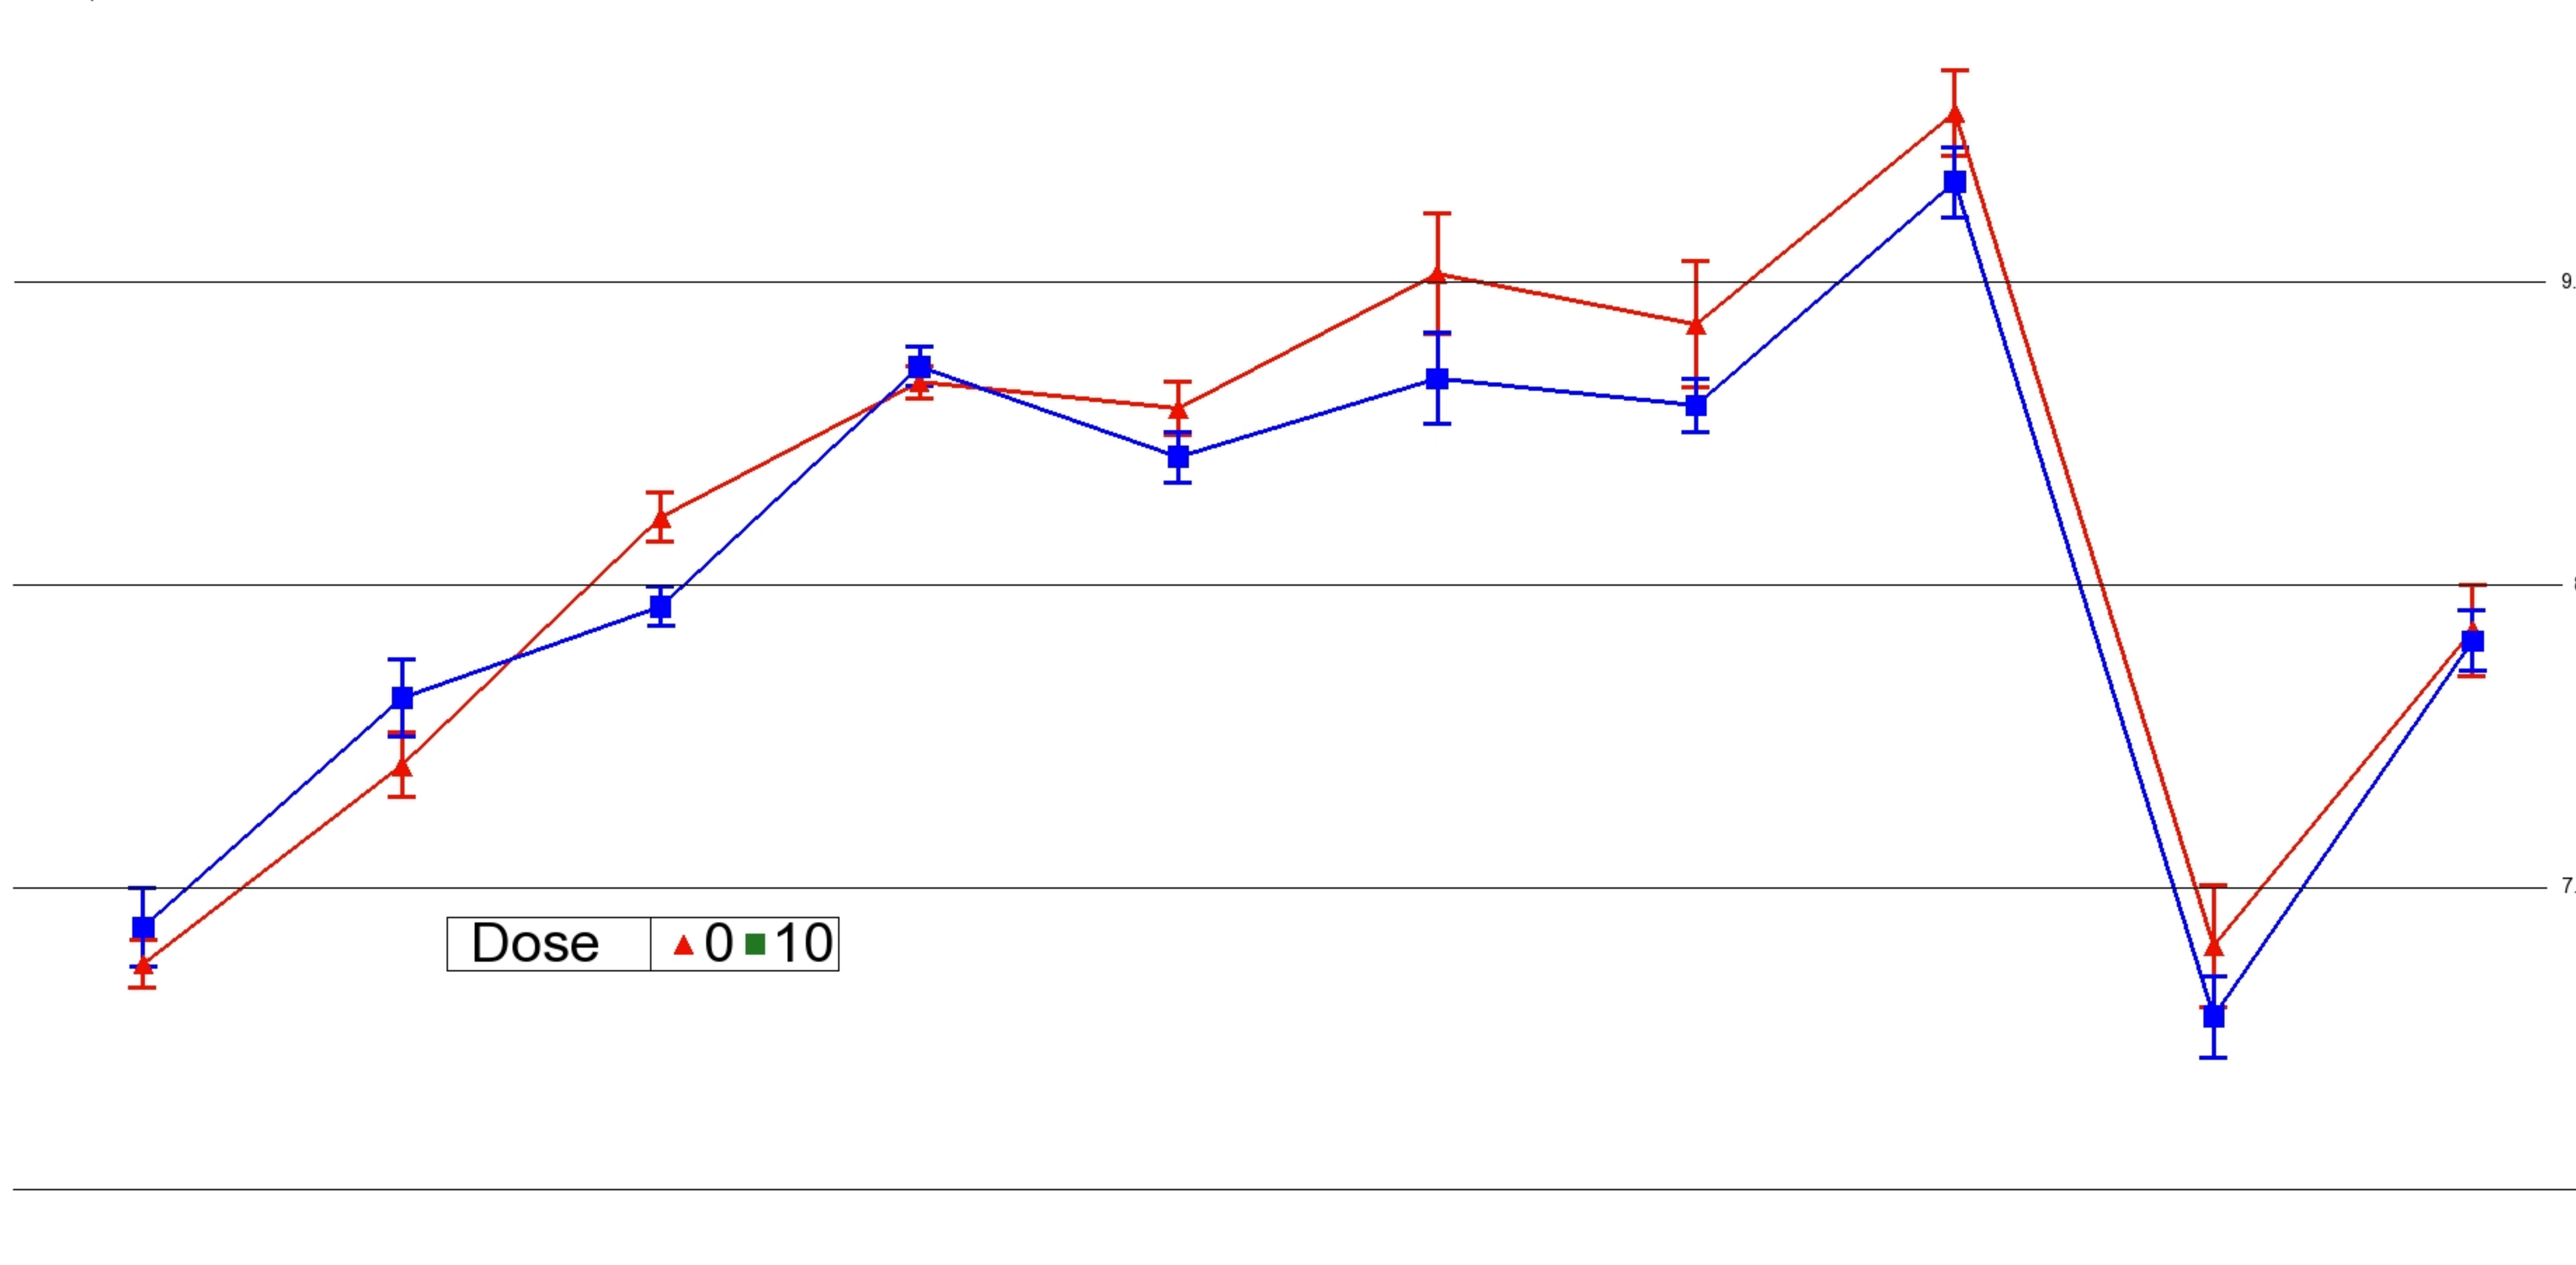

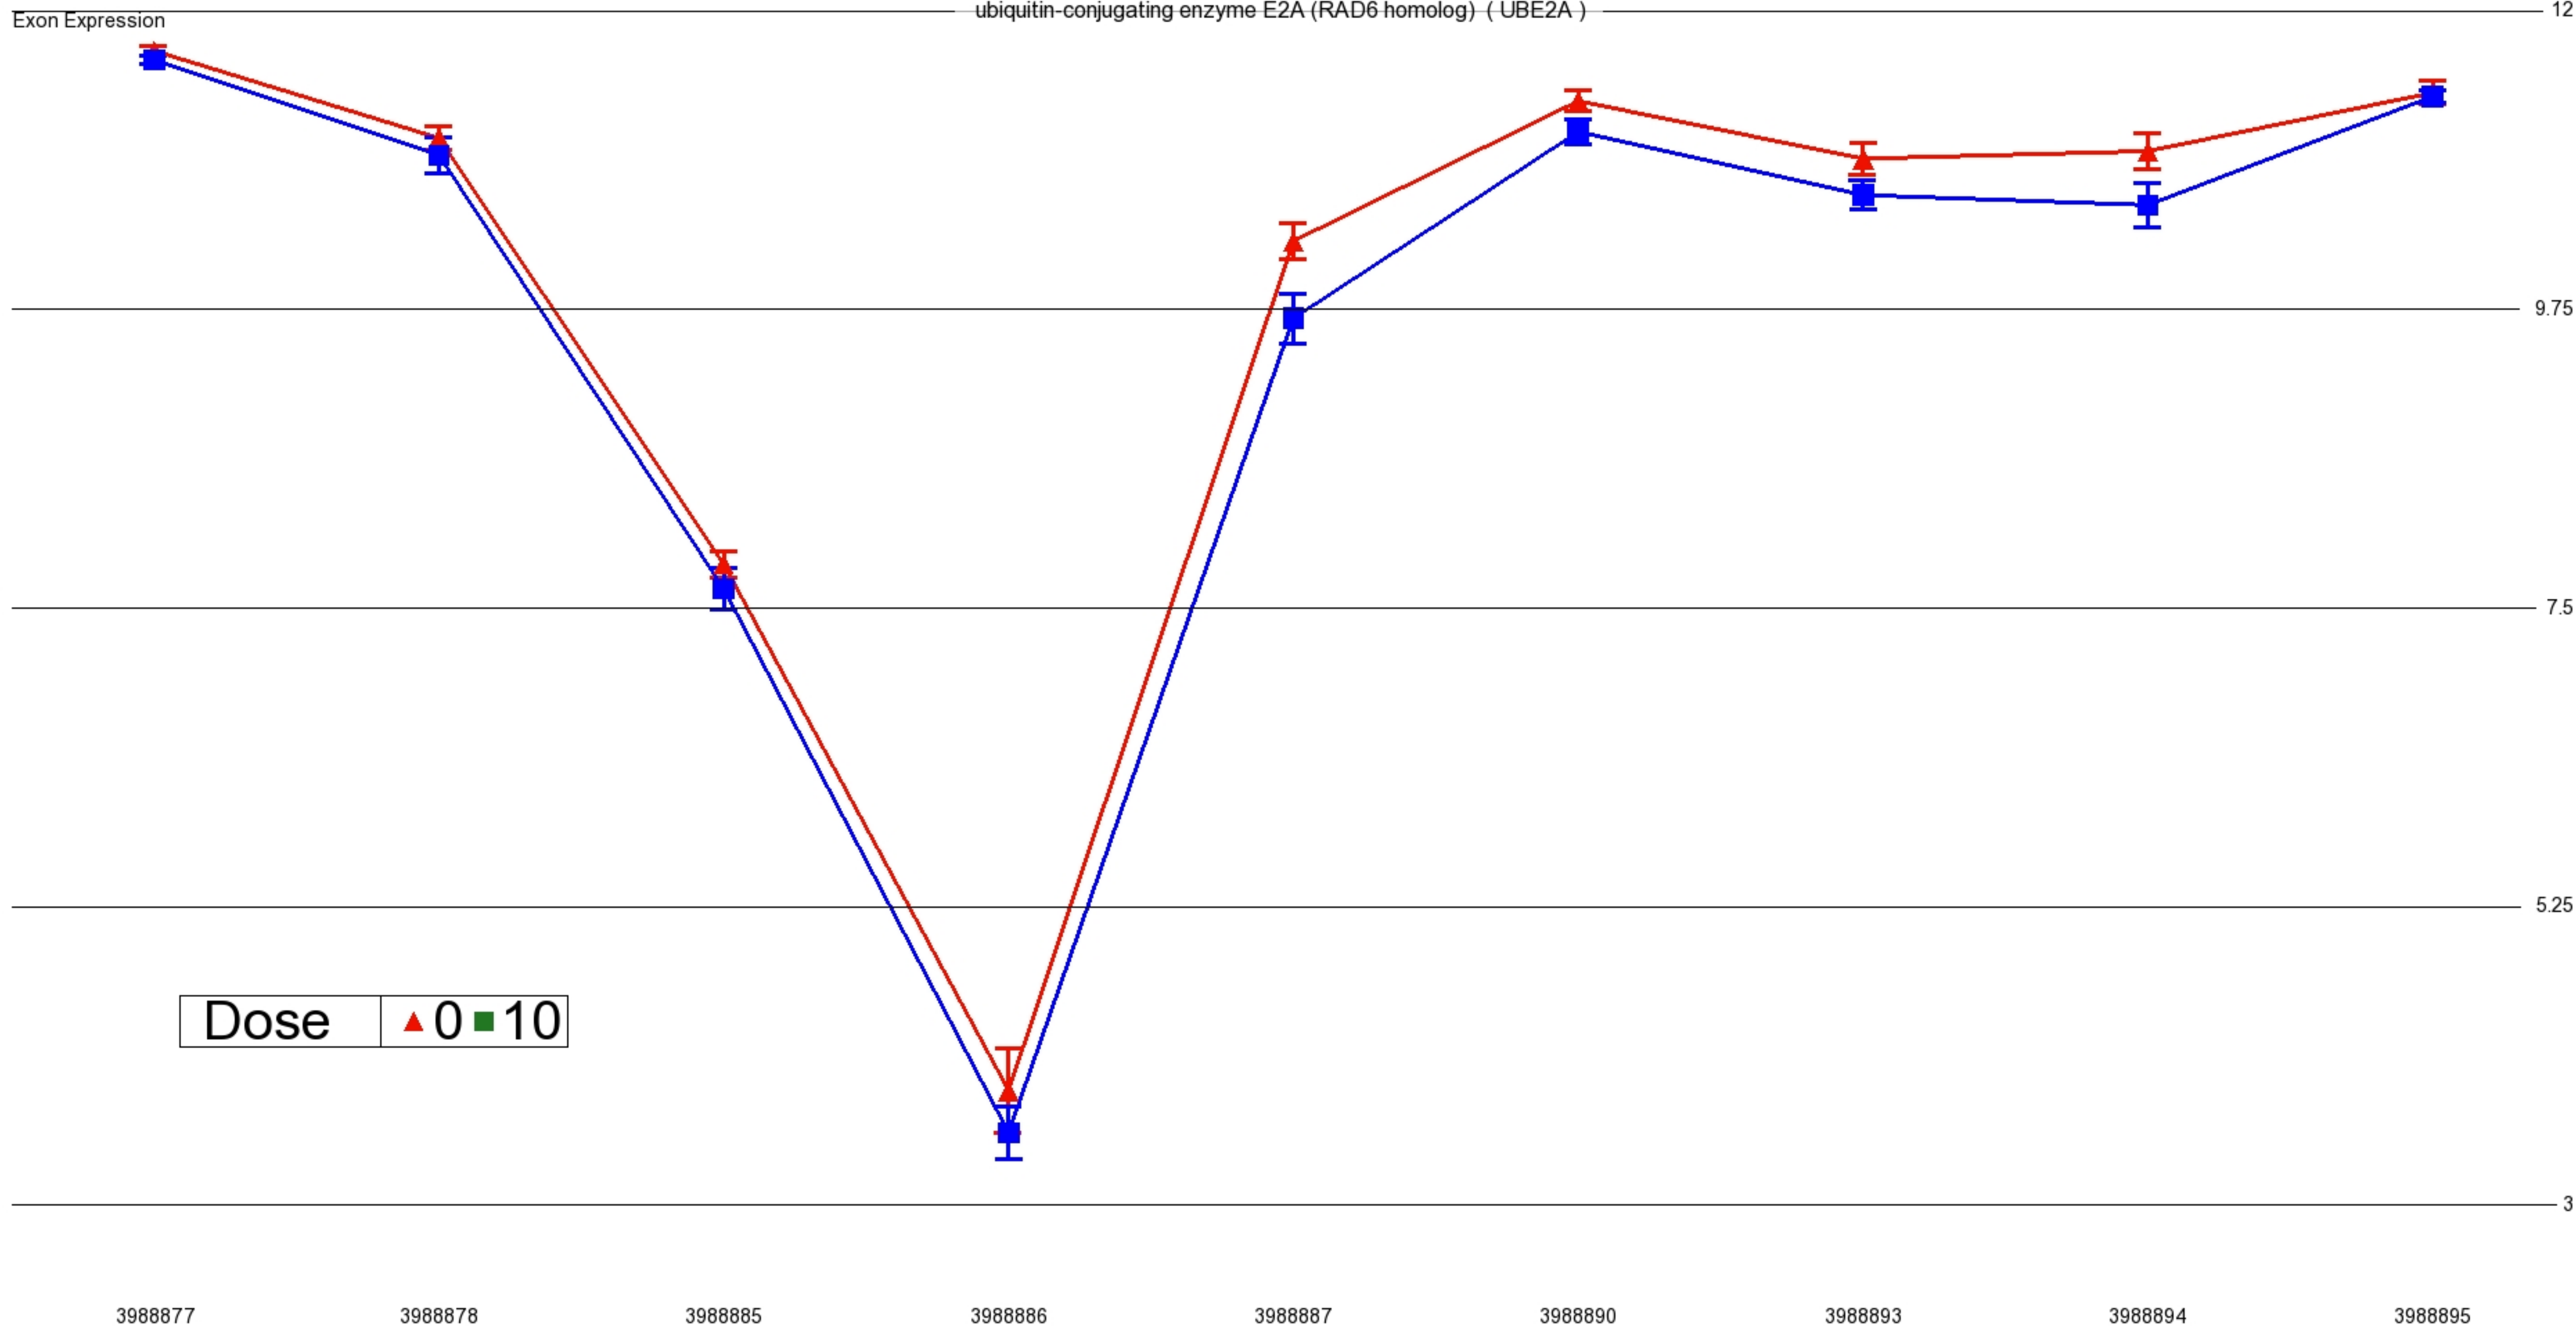

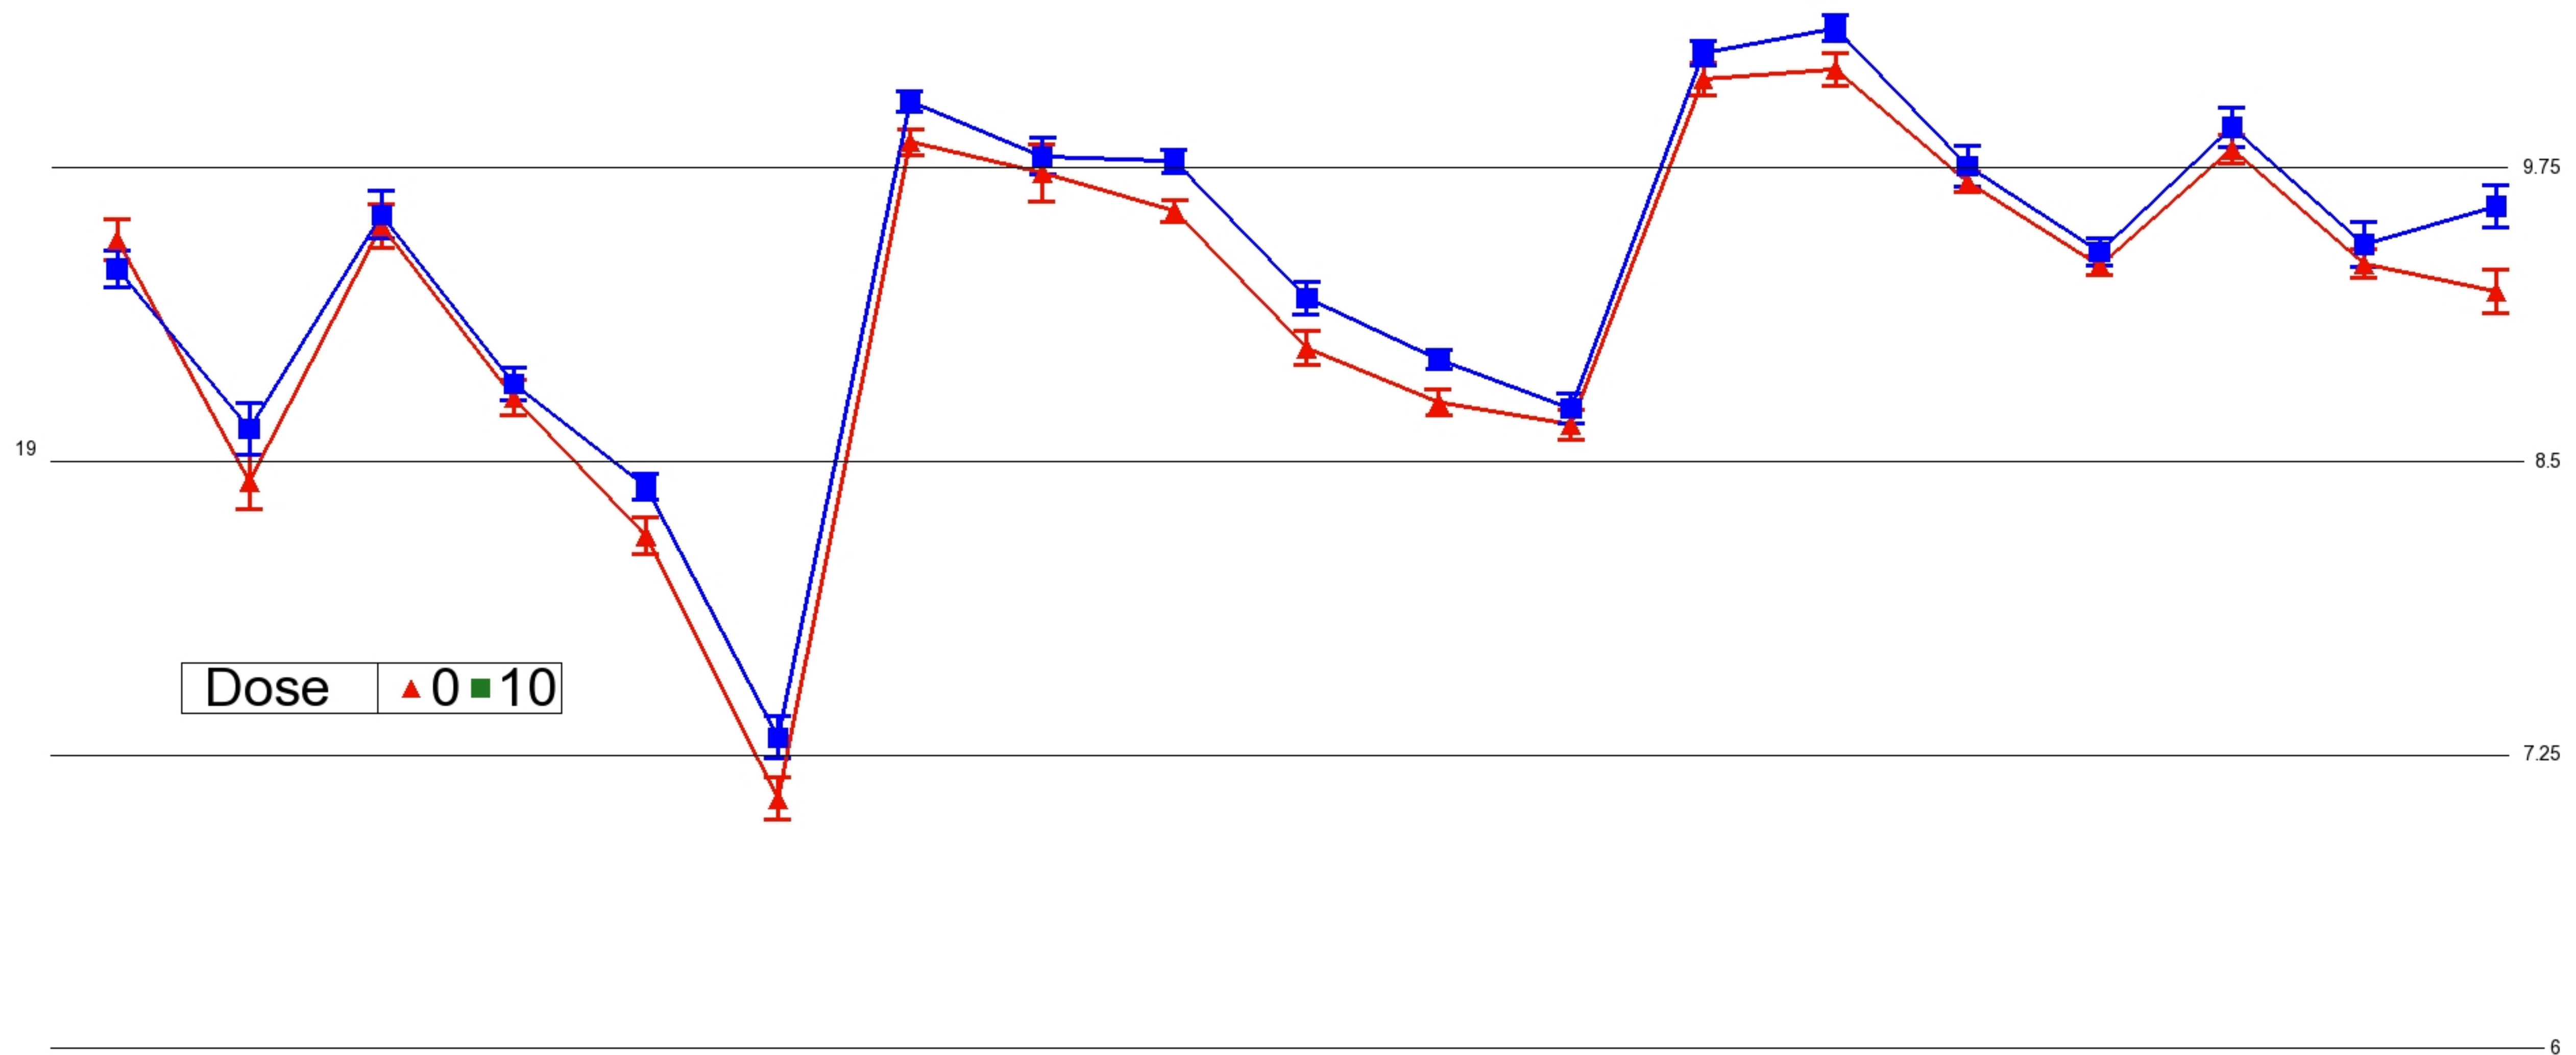

Dose ▲ 0 ■ 10

14

Dose ▲ 0 ■ 10

7

5

3

3538704

3538705

3538728

3538730

3538731

3538733

3538735

3538742

3538762

3538763

3538764

3538765

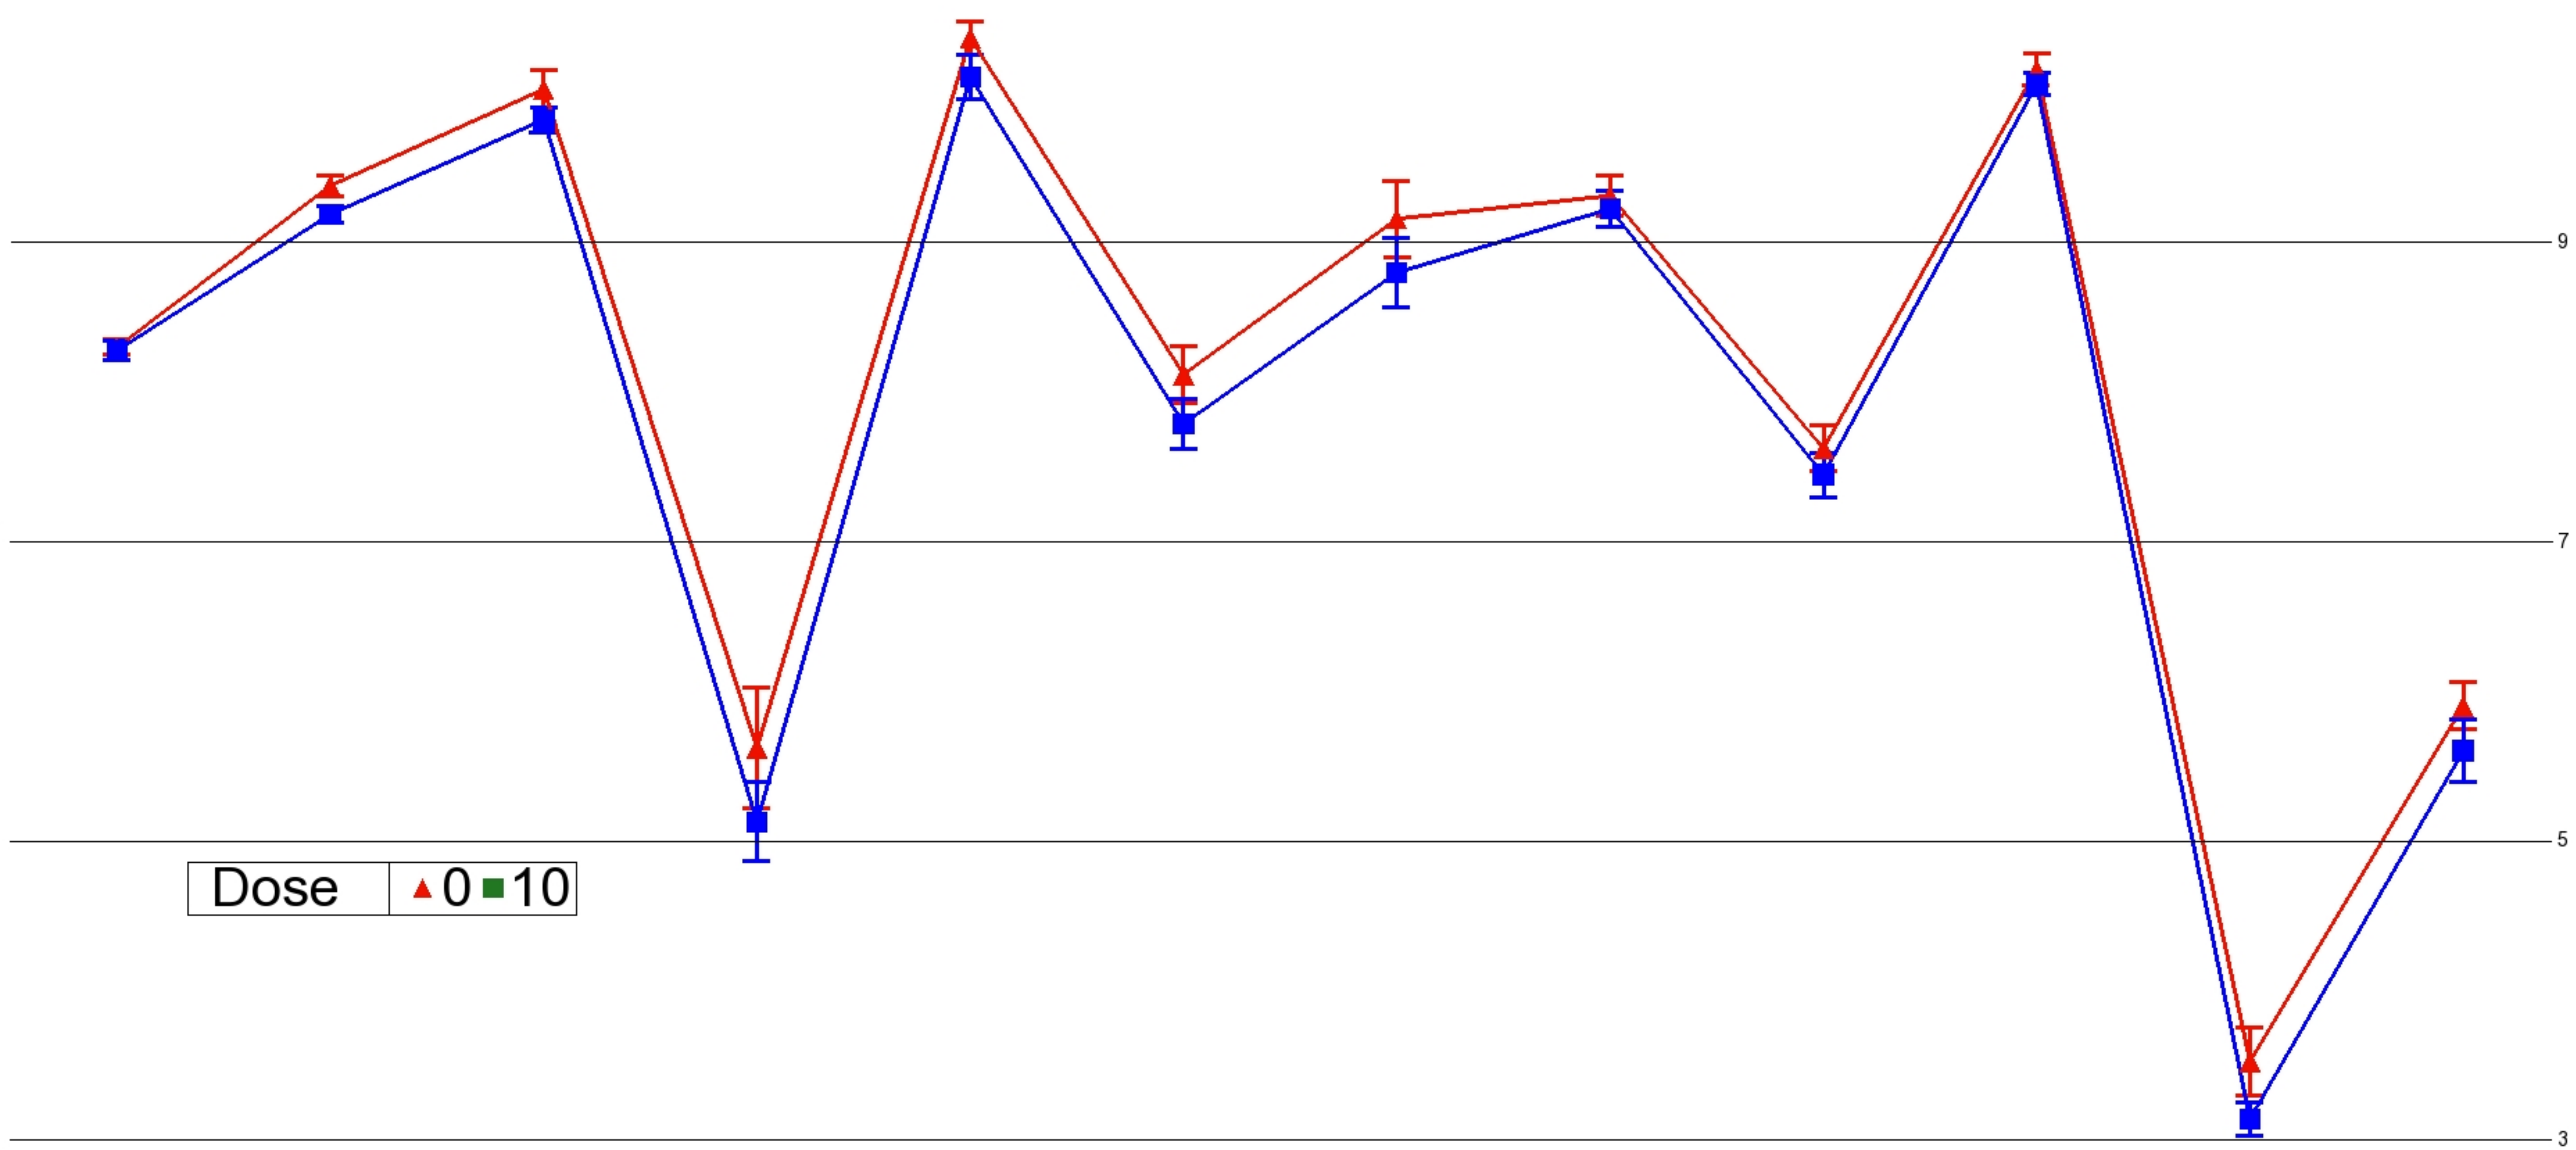

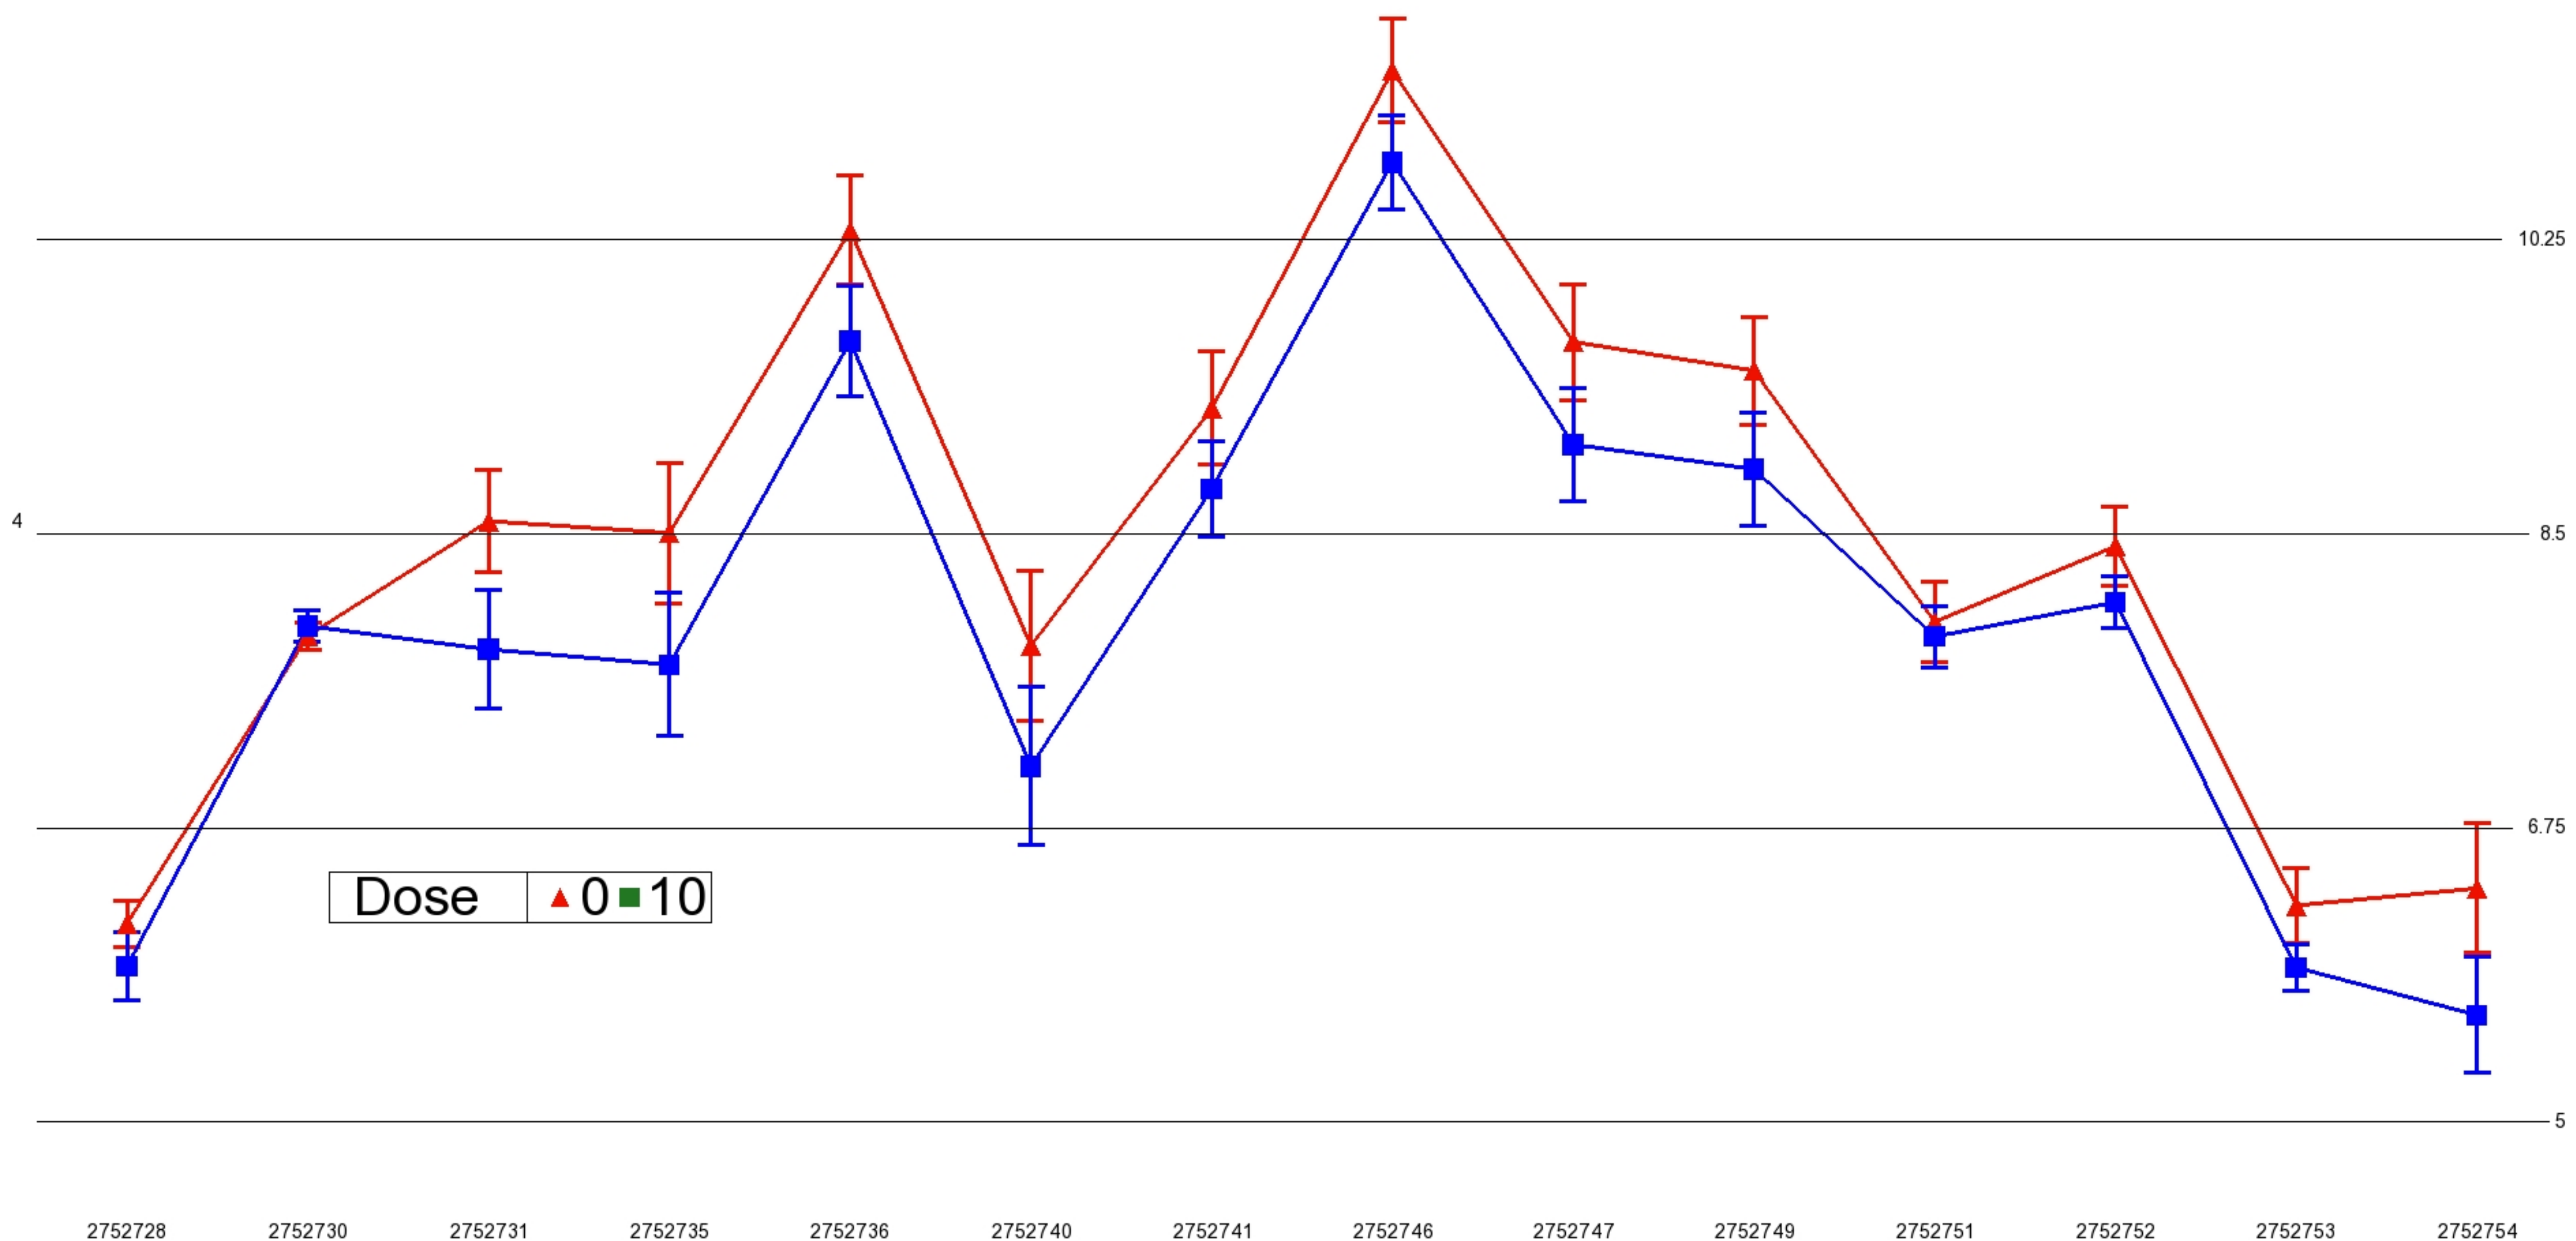

Dose ▲ 0 ■ 10

3527495 3527496 3527497 3527500 3527505 3527506 3527507 3527508 3527509

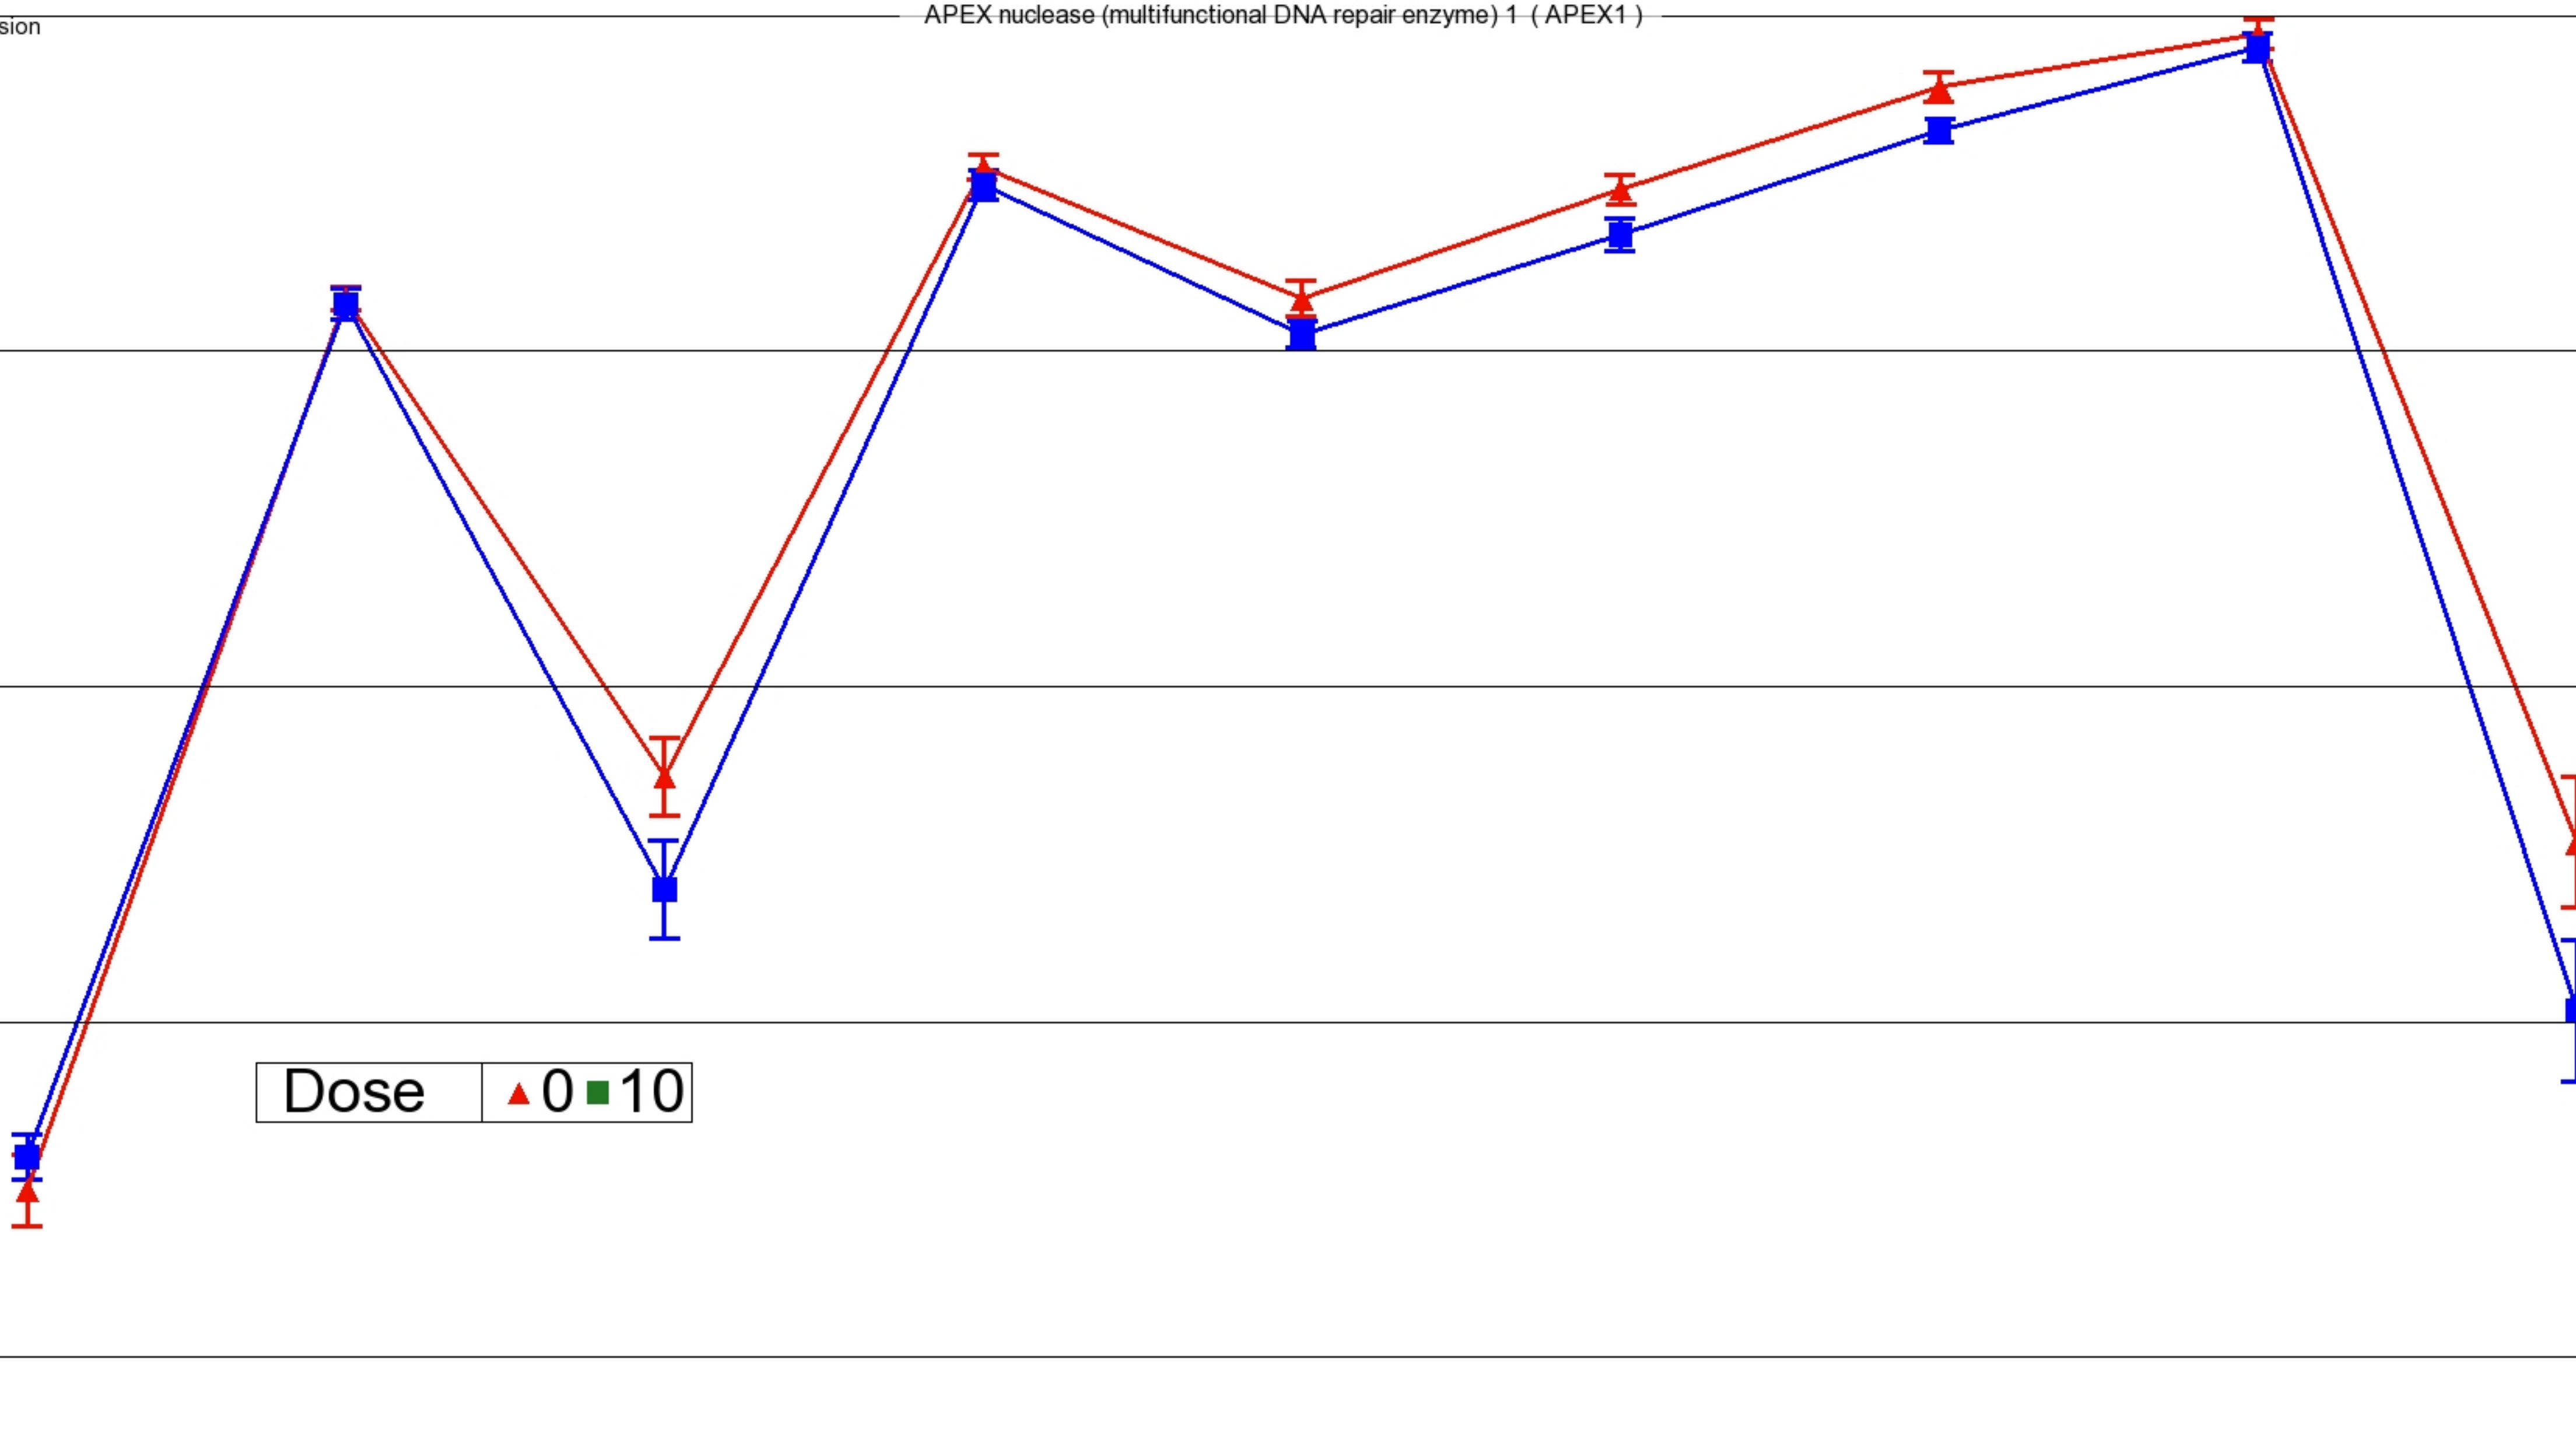



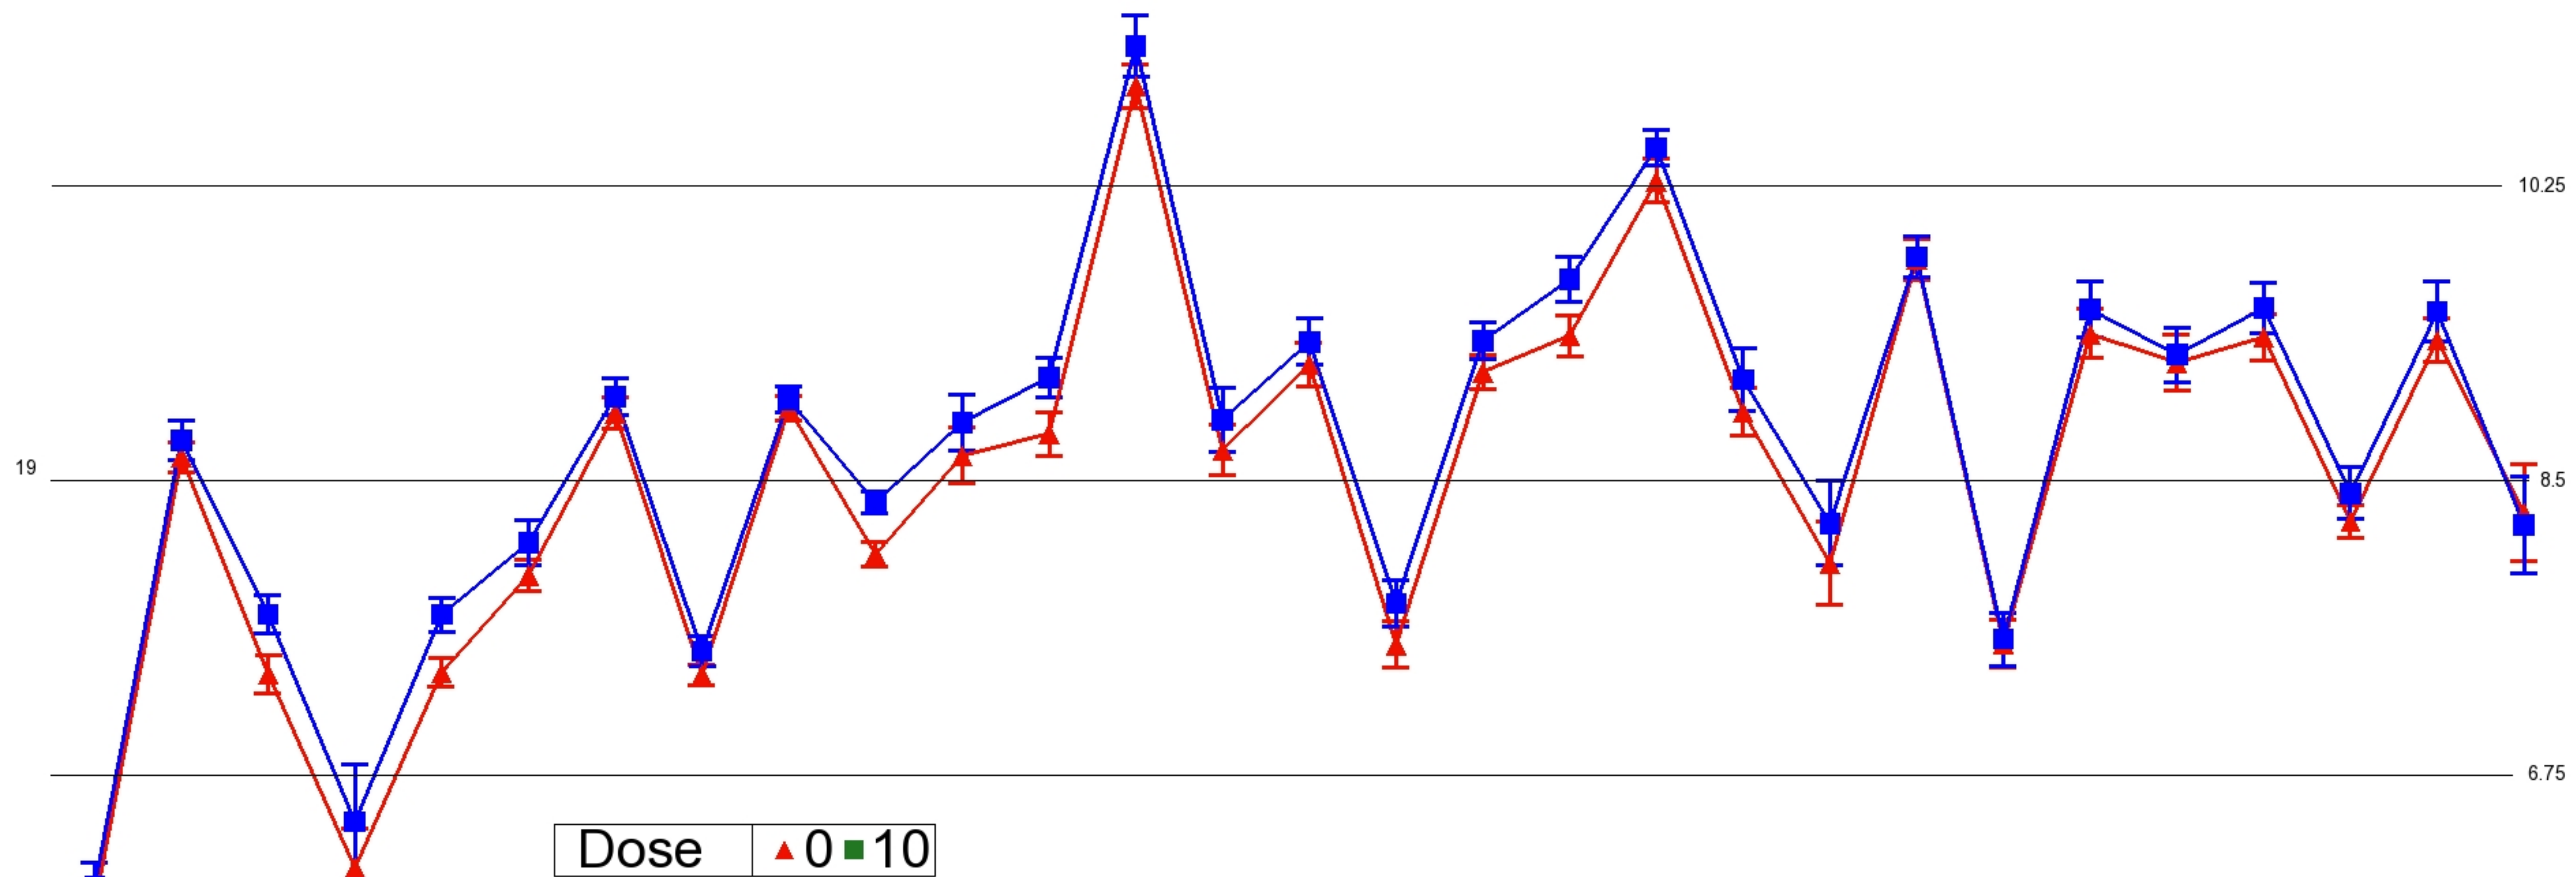

19

6.75

5

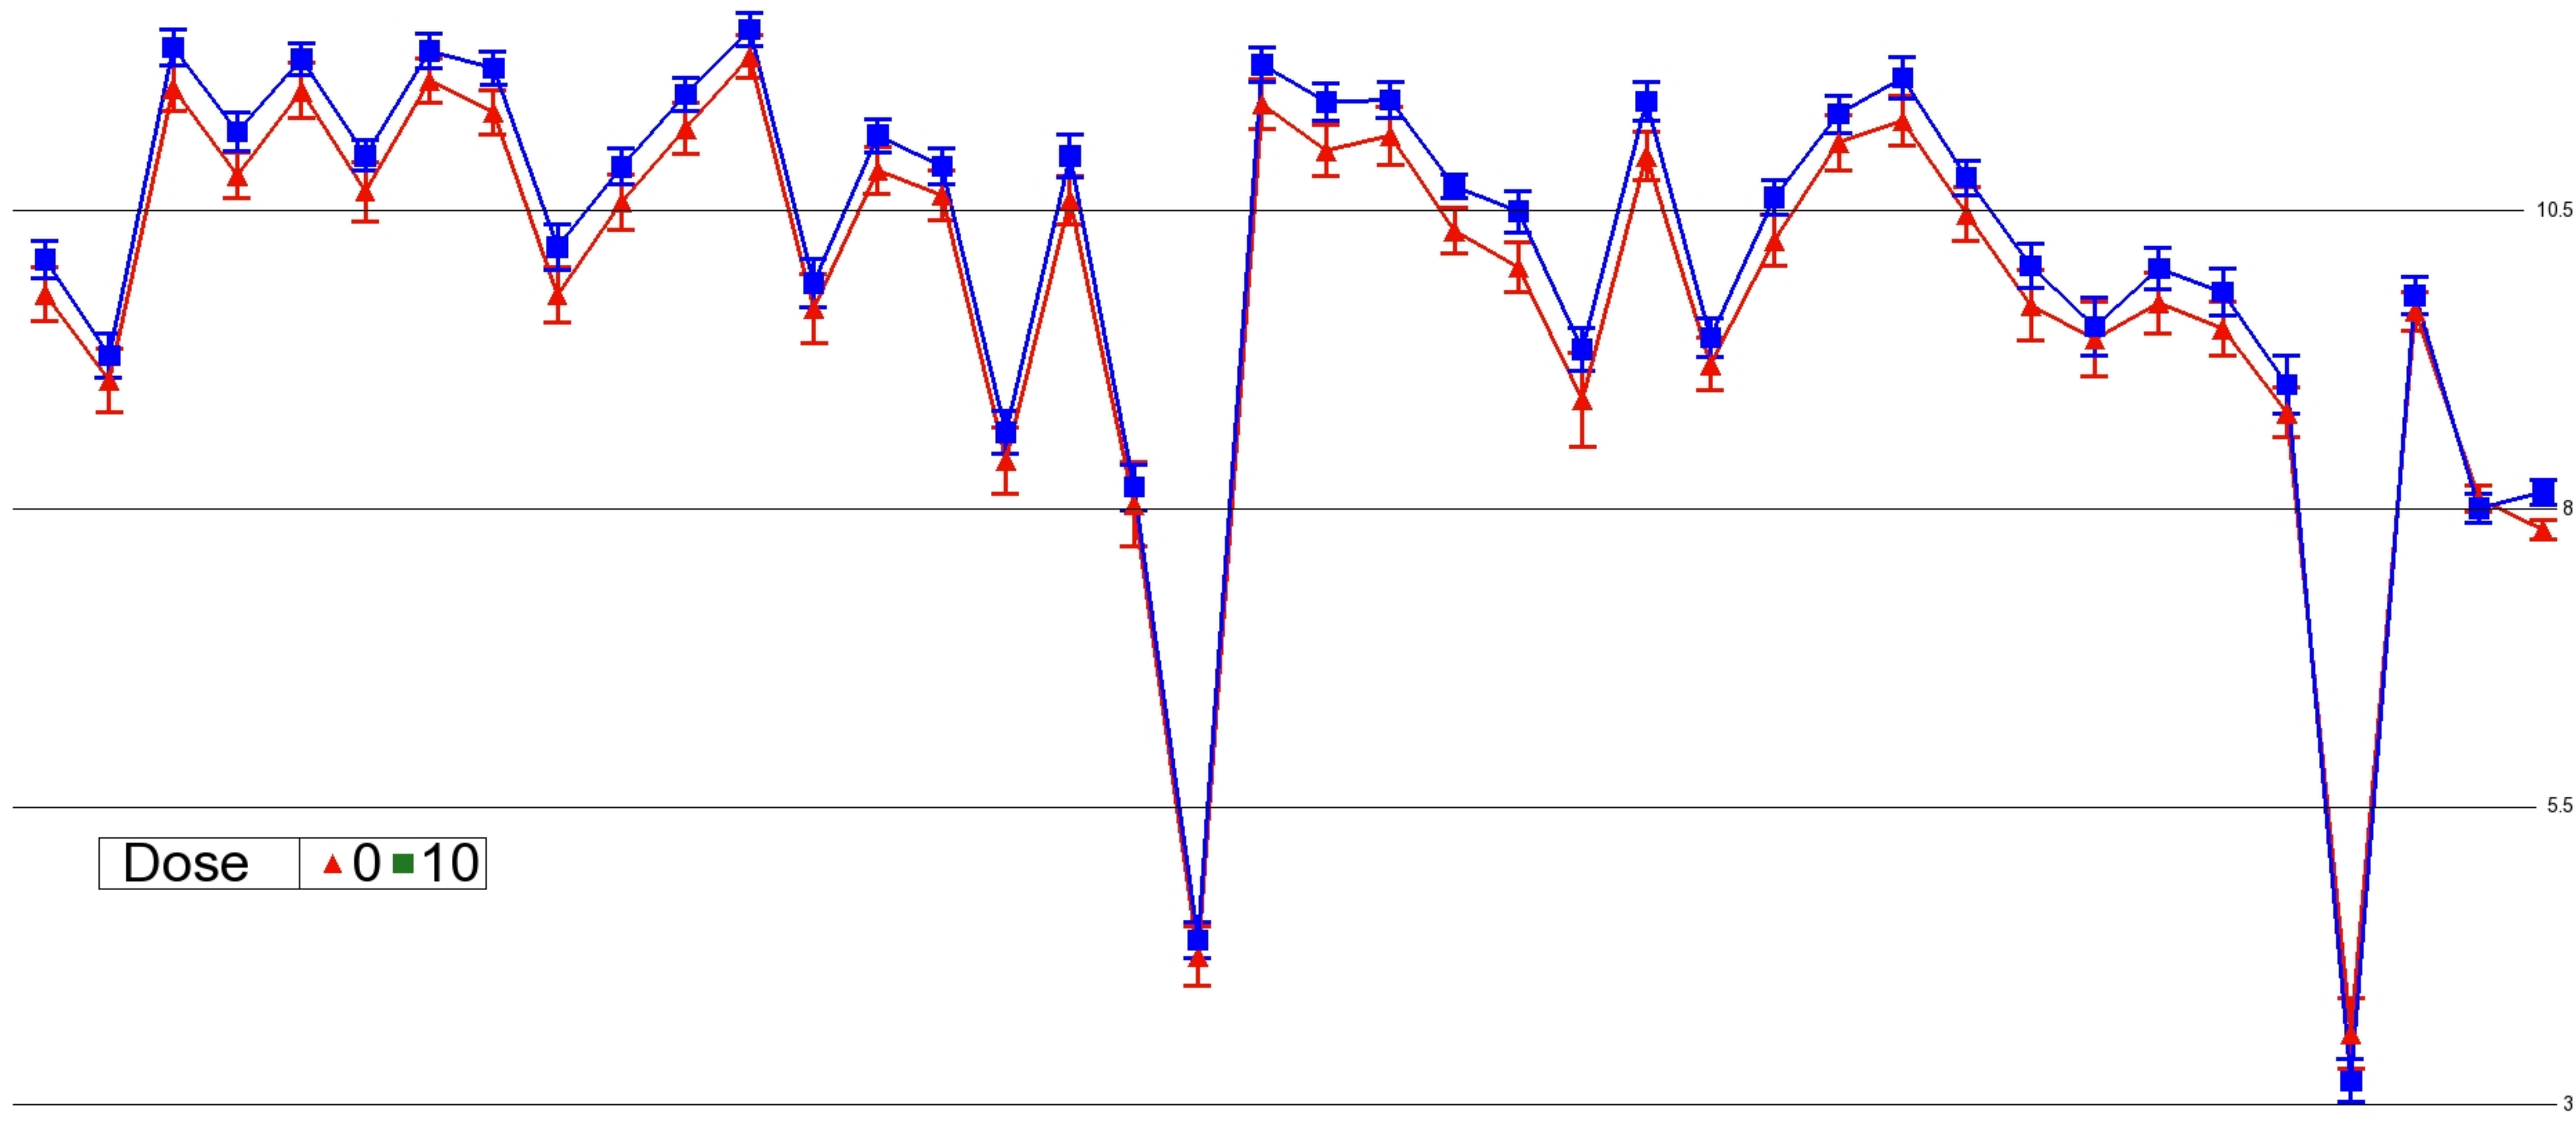

Dose ▲ 0 ■ 10
